# Supplementary material
Source: PubMed Central journal article supplement (PMC4591186)
Supplement: NIHMS712760-supplement-3.pdf [file NIHMS712760-supplement-3.pdf]

**Orbital Pseudotumor Can Be a Localized Form of Granulomatosis with  
Polyangiitis As Revealed by Gene Expression Profiling**

**Supplemental Table 1:** page Supplement 2

**Supplemental Table 2:** page Supplement 8

**Supplemental Table 3:** page Supplement 44

**Supplemental Table 4:** page Supplement 46

**Supplemental Table 5:** page Supplement 52

**Supplemental Table 1.** Probe sets indicating increased expression of genes in anterior orbit tissues from subjects with GPA compared to uninfamed control tissues.

| Probe Set   | Gene Symbol                                                                                                                                   | Set 1           |             | Set 2           |             |
|-------------|-----------------------------------------------------------------------------------------------------------------------------------------------|-----------------|-------------|-----------------|-------------|
|             |                                                                                                                                               | Fold Difference | FDR P-value | Fold Difference | FDR P-value |
| 211430_s_at | IGHG1 /// IGHG2 /// IGHM /// IGHV4-31                                                                                                         | 34.60           | 2.24E-05    | 155.27          | 3.34E-04    |
| 224795_x_at | IGK /// IGKC                                                                                                                                  | 13.93           | 8.12E-04    | 81.13           | 2.89E-04    |
| 221671_x_at | IGK /// IGKC                                                                                                                                  | 12.66           | 4.51E-04    | 68.79           | 2.47E-04    |
| 221651_x_at | IGK /// IGKC                                                                                                                                  | 12.74           | 4.56E-04    | 60.21           | 4.35E-04    |
| 214677_x_at | IGLC1                                                                                                                                         | 9.35            | 9.63E-03    | 58.44           | 1.11E-03    |
| 209875_s_at | SPP1                                                                                                                                          | 56.68           | 7.04E-04    | 54.74           | 2.51E-03    |
| 209138_x_at | IGLC1                                                                                                                                         | 10.58           | 4.35E-03    | 53.30           | 9.09E-04    |
| 215176_x_at | IGK /// IGKC                                                                                                                                  | 13.68           | 7.08E-03    | 51.86           | 3.96E-03    |
| 214768_x_at | IGKV2-28 /// IGHV2-28 /// IGHV2D-28 /// IGHV2D-28<br>IGH /// IGHA1 /// IGHA2 /// IGHD /// IGHG1 /// IGHG3 /// IGHG4 /// IGHM /// IGHV3-23 /// | 7.45            | 9.93E-03    | 50.04           | 8.01E-04    |
| 211637_x_at | IGHV4-31                                                                                                                                      | 19.52           | 7.81E-04    | 45.18           | 2.43E-04    |
| 211644_x_at | IGK /// IGKC                                                                                                                                  | 15.46           | 2.22E-04    | 41.83           | 1.29E-03    |
| 216491_x_at | IGHM                                                                                                                                          | 15.85           | 1.30E-03    | 41.14           | 3.77E-04    |
| 214669_x_at | IGKC                                                                                                                                          | 13.28           | 3.77E-04    | 41.10           | 7.07E-04    |
| 211645_x_at | IGKV1-17 /// IGKV1-17                                                                                                                         | 9.29            | 1.49E-02    | 38.12           | 4.71E-03    |
| 215121_x_at | CYAT1 /// IGLC1 /// IGLV1-44                                                                                                                  | 8.73            | 4.10E-03    | 37.02           | 2.01E-03    |
| 215379_x_at | IGLV1-44                                                                                                                                      | 8.33            | 3.30E-03    | 36.77           | 1.38E-03    |
| 216576_x_at | IGK /// IGKC                                                                                                                                  | 13.44           | 3.05E-03    | 35.00           | 3.47E-03    |
| 216207_x_at | IGKC                                                                                                                                          | 8.30            | 5.82E-03    | 32.06           | 4.47E-03    |
| 211634_x_at | IGHM<br>IGH /// IGHA1 /// IGHA2 /// IGHD /// IGHG1 ///                                                                                        | 10.20           | 6.24E-04    | 22.73           | 2.30E-03    |
| 211639_x_at | IGHG3 /// IGHG4 /// IGHM /// IGHV4-31                                                                                                         | 8.10            | 9.08E-03    | 22.72           | 1.70E-04    |
| 217022_s_at | IGH /// IGHA1 /// IGHA2                                                                                                                       | 7.13            | 2.76E-02    | 22.39           | 6.73E-03    |
| 214777_at   | IGKV4-1 /// IGKV4-1                                                                                                                           | 11.91           | 2.35E-03    | 21.00           | 1.81E-03    |
| 217378_x_at | AC016745.2 /// OTTHUMG00000153338<br>AC127391.1 /// AC128677.4 /// IGKV1OR-2 /// IGKV1OR10-1 /// IGKV1OR2-118 ///<br>OTTHUMG00000155081 ///   | 7.78            | 7.04E-03    | 20.71           | 3.92E-03    |
| 217480_x_at | OTTHUMG00000155090<br>IGHA1 /// IGHA2 /// IGHG1 /// IGHG3 /// IGHM<br>/// IGHV3-23 /// IGHV4-31                                               | 6.06            | 7.40E-03    | 19.70           | 2.66E-03    |
| 214916_x_at | ---                                                                                                                                           | 8.20            | 1.49E-03    | 19.59           | 2.63E-04    |
| 211633_x_at | ---                                                                                                                                           | 11.54           | 1.06E-03    | 17.48           | 3.25E-03    |
| 214836_x_at | IGK /// IGKC                                                                                                                                  | 10.13           | 1.01E-03    | 17.33           | 2.51E-03    |
| 211643_x_at | IGK /// IGKC<br>IGHA1 /// IGHG1 /// IGHM /// IGHV3-23 ///                                                                                     | 8.78            | 1.27E-03    | 17.18           | 9.98E-03    |
| 216510_x_at | IGHV4-31                                                                                                                                      | 7.64            | 3.50E-03    | 16.84           | 4.41E-03    |
| 214973_x_at | IGHD<br>IGH /// IGHA1 /// IGHD /// IGHG1 /// IGHG3 ///                                                                                        | 12.44           | 3.35E-04    | 15.87           | 6.54E-03    |
| 211650_x_at | IGHM /// IGHV3-23 /// IGHV4-31<br>IGHA1 /// IGHA2 /// IGHD /// IGHG1 /// IGHG3 ///                                                            | 6.71            | 4.03E-04    | 15.15           | 8.77E-04    |
| 211635_x_at | IGHG4 /// IGHM /// IGHV4-31                                                                                                                   | 4.36            | 2.30E-02    | 13.69           | 1.20E-03    |
| 211640_x_at | IGHG1 /// IGHM                                                                                                                                | 8.43            | 3.04E-03    | 13.65           | 2.28E-03    |
| 209374_s_at | IGHM                                                                                                                                          | 6.82            | 9.16E-03    | 10.87           | 4.90E-03    |
| 209396_s_at | CHI3L1                                                                                                                                        | 20.75           | 2.12E-04    | 10.78           | 2.16E-02    |

|              |                                                     |       |          |       |          |
|--------------|-----------------------------------------------------|-------|----------|-------|----------|
| 1555745_a_at | LYZ                                                 | 9.04  | 2.47E-03 | 10.53 | 1.83E-02 |
| 217235_x_at  | IGLL5                                               | 6.24  | 7.73E-03 | 8.23  | 1.51E-02 |
| 1568574_x_at | SPP1                                                | 5.85  | 7.91E-03 | 8.21  | 7.26E-03 |
| 1555756_a_at | CLEC7A                                              | 10.12 | 1.38E-02 | 8.19  | 3.73E-02 |
| 202834_at    | AGT                                                 | 12.04 | 1.18E-03 | 8.18  | 4.06E-02 |
| 237625_s_at  | ---                                                 | 7.11  | 2.96E-02 | 7.64  | 1.69E-02 |
| 209201_x_at  | CXCR4                                               | 7.65  | 7.39E-03 | 7.58  | 1.10E-02 |
| 211919_s_at  | CXCR4                                               | 8.67  | 1.13E-02 | 7.30  | 7.46E-03 |
| 209395_at    | CHI3L1                                              | 23.21 | 1.27E-03 | 7.21  | 7.15E-03 |
|              | IGHA1 /// IGHD /// IGHG1 /// IGHG3 /// IGHM ///     |       |          |       |          |
| 216557_x_at  | IGHV4-31                                            | 5.43  | 7.66E-03 | 7.07  | 1.50E-02 |
| 205267_at    | POU2AF1                                             | 10.59 | 1.47E-03 | 7.01  | 1.47E-02 |
| 216542_x_at  | IGHA1 /// IGHG1 /// IGHM                            | 5.21  | 1.58E-02 | 6.66  | 9.82E-03 |
| 212827_at    | IGHM                                                | 9.60  | 3.48E-02 | 6.49  | 2.56E-02 |
| 222838_at    | SLAMF7                                              | 5.30  | 4.72E-03 | 6.46  | 3.09E-02 |
| 1554406_a_at | CLEC7A                                              | 4.06  | 1.37E-02 | 6.34  | 2.23E-04 |
| 211429_s_at  | SERPINA1                                            | 11.48 | 1.75E-04 | 6.31  | 3.80E-02 |
| 1558199_at   | FN1                                                 | 4.89  | 2.41E-02 | 6.07  | 6.71E-03 |
| 220306_at    | FAM46C                                              | 4.28  | 3.16E-02 | 6.01  | 2.99E-02 |
| 234792_x_at  | IGHA1 /// IGHV4-31                                  | 6.28  | 1.79E-02 | 6.00  | 3.51E-02 |
| 204116_at    | IL2RG                                               | 8.62  | 9.70E-04 | 5.94  | 1.70E-02 |
| 216560_x_at  | IGLV3-10 /// IGLV3-10                               | 3.81  | 1.80E-02 | 5.85  | 1.81E-02 |
| 219386_s_at  | SLAMF8                                              | 11.25 | 8.00E-06 | 5.80  | 3.41E-02 |
| 217028_at    | CXCR4                                               | 9.47  | 1.15E-02 | 5.70  | 4.22E-02 |
| 219890_at    | CLEC5A                                              | 7.85  | 1.70E-06 | 5.68  | 6.26E-03 |
| 224342_x_at  | LOC96610                                            | 6.29  | 2.66E-03 | 5.59  | 4.79E-02 |
| 211881_x_at  | IGLJ3                                               | 3.10  | 4.14E-02 | 5.53  | 2.30E-02 |
| 213193_x_at  | TRBC1                                               | 4.96  | 3.31E-03 | 5.37  | 1.81E-02 |
|              | HIST1H3A /// HIST1H3B /// HIST1H3C ///              |       |          |       |          |
|              | HIST1H3D /// HIST1H3E /// HIST1H3F ///              |       |          |       |          |
|              | HIST1H3G /// HIST1H3H /// HIST1H3I ///              |       |          |       |          |
| 208506_at    | HIST1H3J                                            | 6.14  | 4.07E-03 | 5.16  | 1.16E-02 |
| 211908_x_at  | IGK                                                 | 3.52  | 1.58E-02 | 5.11  | 8.75E-04 |
| 1555349_a_at | ITGB2                                               | 6.57  | 2.61E-04 | 5.06  | 7.82E-03 |
| 215949_x_at  | IGHM                                                | 3.95  | 1.52E-02 | 5.03  | 5.48E-03 |
|              | IGH /// IGH A1 /// IGH A2 /// IGH G1 /// IGH G2 /// |       |          |       |          |
| 217281_x_at  | IGHG3 /// IGHM /// IGHV4-31                         | 6.77  | 6.04E-03 | 4.99  | 2.25E-02 |
| 203936_s_at  | MMP9                                                | 10.40 | 2.16E-05 | 4.75  | 1.54E-02 |
|              | IGHA1 /// IGH A2 /// IGHD /// IGHG1 /// IGHG3 ///   |       |          |       |          |
| 211641_x_at  | IGHM /// IGHV4-31                                   | 3.55  | 2.25E-02 | 4.45  | 1.42E-03 |
| 205798_at    | IL7R                                                | 6.15  | 1.21E-02 | 4.42  | 1.78E-02 |
| 226658_at    | PDPN                                                | 3.28  | 1.54E-02 | 4.13  | 2.46E-02 |
| 211991_s_at  | HLA-DPA1                                            | 3.21  | 2.22E-02 | 4.08  | 5.08E-03 |
| 210072_at    | CCL19                                               | 8.99  | 1.37E-04 | 4.07  | 4.51E-02 |
|              | HIST1H3A /// HIST1H3B /// HIST1H3C ///              |       |          |       |          |
|              | HIST1H3D /// HIST1H3E /// HIST1H3F ///              |       |          |       |          |
|              | HIST1H3G /// HIST1H3H /// HIST1H3I ///              |       |          |       |          |
| 208576_s_at  | HIST1H3J                                            | 9.15  | 3.00E-03 | 4.00  | 1.42E-02 |
| 216541_x_at  | IGHG1 /// IGHM                                      | 5.72  | 3.58E-03 | 3.85  | 1.82E-02 |
| 216950_s_at  | FCGR1A /// FCGR1B /// FCGR1C                        | 4.12  | 1.35E-02 | 3.83  | 1.84E-02 |
| 205997_at    | ADAM28                                              | 6.21  | 4.19E-03 | 3.80  | 4.67E-02 |
| 215946_x_at  | IGLL3P                                              | 3.68  | 4.55E-02 | 3.78  | 2.39E-02 |
| 1552497_a_at | SLAMF6                                              | 3.30  | 4.60E-03 | 3.75  | 1.87E-03 |

|              |                  |      |          |      |          |
|--------------|------------------|------|----------|------|----------|
| 212657_s_at  | IL1RN            | 4.06 | 8.97E-03 | 3.69 | 4.68E-03 |
| 1553863_at   | WDFY4            | 2.98 | 5.10E-03 | 3.68 | 3.86E-05 |
| 229041_s_at  | ITGB2-AS1        | 4.05 | 1.73E-03 | 3.68 | 3.71E-02 |
| 219971_at    | IL21R            | 2.88 | 4.59E-02 | 3.65 | 1.61E-03 |
| 1552960_at   | LRRC15           | 3.66 | 2.53E-02 | 3.64 | 1.51E-02 |
| 209696_at    | FBP1             | 3.32 | 2.01E-02 | 3.57 | 2.58E-02 |
| 211796_s_at  | TRBC1            | 4.89 | 2.23E-02 | 3.50 | 1.24E-02 |
| 223562_at    | PARVG            | 3.56 | 2.96E-03 | 3.49 | 2.40E-02 |
| 205213_at    | ACAP1            | 4.85 | 6.72E-03 | 3.48 | 1.37E-03 |
| 202856_s_at  | SLC16A3          | 2.76 | 8.22E-03 | 3.46 | 1.55E-03 |
| 204852_s_at  | PTPN7            | 3.90 | 2.36E-04 | 3.44 | 3.27E-03 |
| 207794_at    | CCR2             | 4.38 | 1.22E-02 | 3.40 | 1.82E-02 |
| 1552806_a_at | SIGLEC10         | 5.43 | 8.53E-05 | 3.35 | 4.11E-02 |
| 222858_s_at  | DAPP1            | 4.07 | 1.40E-03 | 3.32 | 3.07E-02 |
| 210423_s_at  | SLC11A1          | 3.48 | 3.64E-03 | 3.32 | 1.89E-02 |
| 216243_s_at  | IL1RN            | 3.45 | 4.57E-02 | 3.29 | 5.42E-03 |
| 224310_s_at  | BCL11B           | 3.65 | 4.56E-02 | 3.25 | 8.32E-04 |
| 228658_at    | MIAT             | 3.25 | 2.39E-02 | 3.21 | 8.95E-03 |
| 229721_x_at  | DERL3            | 3.87 | 8.11E-03 | 3.21 | 2.40E-02 |
| 233510_s_at  | PARVG            | 5.44 | 5.90E-04 | 3.20 | 5.80E-03 |
| 201422_at    | IFI30 /// PIK3R2 | 2.87 | 2.95E-02 | 3.13 | 4.20E-02 |
| 202857_at    | CNPY2            | 2.96 | 7.32E-03 | 3.13 | 2.13E-03 |
| 221602_s_at  | FAIM3            | 5.07 | 1.84E-02 | 3.10 | 1.69E-02 |
| 204430_s_at  | SLC2A5           | 2.37 | 4.83E-02 | 3.00 | 1.81E-02 |
| 204429_s_at  | SLC2A5           | 3.53 | 6.21E-03 | 2.98 | 7.75E-03 |
| 205713_s_at  | COMP             | 4.31 | 2.49E-02 | 2.94 | 7.18E-03 |
| 214366_s_at  | ALOX5            | 2.90 | 1.57E-02 | 2.91 | 3.03E-02 |
| 239740_at    | ETV6             | 2.67 | 2.76E-02 | 2.89 | 4.35E-02 |
| 220918_at    | RUNX1-IT1        | 3.57 | 5.54E-03 | 2.88 | 4.31E-04 |
| 203554_x_at  | PTTG1            | 2.57 | 3.07E-02 | 2.87 | 8.93E-03 |
| 205237_at    | FCN1             | 4.51 | 1.08E-03 | 2.86 | 3.76E-03 |
| 219559_at    | SLC17A9          | 2.42 | 3.46E-02 | 2.78 | 7.13E-04 |
| 219385_at    | SLAMF8           | 2.86 | 1.38E-02 | 2.77 | 3.45E-02 |
| 228674_s_at  | EML4             | 2.76 | 2.09E-02 | 2.76 | 6.30E-04 |
| 204269_at    | PIM2             | 3.13 | 2.11E-02 | 2.71 | 1.46E-02 |
| 204858_s_at  | TYMP             | 2.45 | 3.30E-02 | 2.71 | 1.43E-04 |
| 220832_at    | TLR8             | 3.38 | 2.25E-02 | 2.70 | 1.04E-02 |
| 208161_s_at  | ABCC3            | 2.57 | 1.92E-02 | 2.67 | 2.88E-03 |
| 211795_s_at  | FYB              | 3.55 | 2.30E-02 | 2.66 | 4.04E-02 |
| 224406_s_at  | FCRL5            | 3.37 | 4.13E-02 | 2.56 | 2.75E-03 |
| 230682_x_at  | ABCC3            | 2.07 | 4.70E-02 | 2.56 | 3.78E-04 |
| 204924_at    | TLR2             | 3.14 | 3.34E-02 | 2.55 | 2.61E-02 |
| 221698_s_at  | CLEC7A           | 4.22 | 1.02E-02 | 2.55 | 3.43E-02 |
| 229045_at    | SNX20            | 2.34 | 2.24E-02 | 2.55 | 3.72E-03 |
| 205298_s_at  | BTN2A2           | 2.16 | 4.26E-02 | 2.49 | 6.70E-04 |
| 1555626_a_at | SLAMF1           | 2.89 | 1.82E-02 | 2.45 | 2.13E-02 |
| 211884_s_at  | CIITA            | 4.54 | 2.23E-03 | 2.43 | 7.01E-03 |
| 232922_s_at  | SLC17A9          | 2.73 | 4.48E-03 | 2.41 | 1.43E-03 |
| 214398_s_at  | IKBKE            | 2.71 | 2.16E-03 | 2.40 | 7.24E-04 |
| 209641_s_at  | ABCC3            | 2.76 | 1.64E-02 | 2.40 | 1.04E-03 |
| 213475_s_at  | ITGAL            | 3.23 | 2.04E-02 | 2.39 | 2.71E-02 |
| 208268_at    | ADAM28           | 3.34 | 2.37E-02 | 2.38 | 4.08E-02 |
| 212020_s_at  | MKI67            | 2.85 | 3.13E-02 | 2.37 | 6.26E-04 |

|              |                                        |      |          |      |          |
|--------------|----------------------------------------|------|----------|------|----------|
| 204057_at    | IRF8                                   | 2.52 | 1.93E-02 | 2.36 | 6.05E-03 |
| 215923_s_at  | PSD4                                   | 3.74 | 7.04E-03 | 2.35 | 2.88E-02 |
| 207187_at    | JAK3                                   | 2.43 | 6.17E-03 | 2.35 | 3.05E-03 |
|              | HIST1H3A /// HIST1H3B /// HIST1H3C /// |      |          |      |          |
|              | HIST1H3D /// HIST1H3E /// HIST1H3F /// |      |          |      |          |
|              | HIST1H3G /// HIST1H3H /// HIST1H3I /// |      |          |      |          |
| 208496_x_at  | HIST1H3J                               | 2.84 | 2.37E-02 | 2.34 | 2.07E-02 |
| 210663_s_at  | KYNU                                   | 2.27 | 4.98E-02 | 2.33 | 4.55E-02 |
| 202954_at    | UBE2C                                  | 2.50 | 3.93E-02 | 2.33 | 1.87E-03 |
| 239287_at    | AC079767.4 /// OTTHUMG00000154786      | 2.10 | 1.00E-02 | 2.33 | 2.52E-02 |
| 1555213_a_at | CLEC7A                                 | 4.04 | 1.84E-05 | 2.31 | 2.12E-03 |
| 221581_s_at  | LAT2                                   | 2.97 | 2.84E-03 | 2.30 | 4.79E-03 |
| 243158_at    | ---                                    | 2.96 | 1.82E-03 | 2.28 | 2.51E-03 |
| 222866_s_at  | FLVCR2                                 | 2.67 | 4.49E-03 | 2.27 | 3.16E-02 |
| 205179_s_at  | ADAM8                                  | 2.44 | 3.64E-02 | 2.25 | 1.04E-02 |
| 207521_s_at  | ATP2A3                                 | 2.79 | 4.90E-02 | 2.25 | 4.26E-02 |
| 1570165_at   | ---                                    | 2.80 | 2.03E-03 | 2.22 | 1.69E-02 |
| 204401_at    | KCNN4                                  | 2.54 | 1.46E-02 | 2.21 | 8.35E-03 |
| 210184_at    | ITGAX                                  | 2.86 | 1.32E-03 | 2.21 | 3.00E-02 |
| 228094_at    | AMICA1                                 | 2.30 | 2.08E-02 | 2.21 | 7.28E-04 |
| 219256_s_at  | SH3TC1                                 | 2.86 | 5.57E-03 | 2.20 | 1.55E-03 |
| 206934_at    | SIRPB1                                 | 3.31 | 1.34E-03 | 2.20 | 6.97E-03 |
| 1552772_at   | CLEC4D                                 | 2.00 | 4.57E-02 | 2.19 | 3.48E-02 |
| 204254_s_at  | VDR                                    | 2.18 | 1.42E-02 | 2.19 | 1.42E-02 |
| 1556797_at   | RNF144A-AS1                            | 2.54 | 8.29E-03 | 2.18 | 1.24E-02 |
| 236988_x_at  | ITGB2                                  | 2.81 | 1.16E-03 | 2.18 | 1.72E-03 |
| 216166_at    | ---                                    | 2.88 | 2.81E-02 | 2.18 | 3.26E-02 |
| 226906_s_at  | ARHGAP9                                | 3.25 | 3.49E-03 | 2.18 | 4.23E-04 |
| 222782_s_at  | GMIP                                   | 2.55 | 3.53E-03 | 2.17 | 2.22E-03 |
| 207339_s_at  | LTB                                    | 2.45 | 3.98E-02 | 2.16 | 6.81E-03 |
| 1556959_at   | ANHX                                   | 2.24 | 2.48E-02 | 2.16 | 1.83E-04 |
| 204445_s_at  | ALOX5                                  | 3.02 | 9.34E-04 | 2.15 | 9.67E-03 |
| 204158_s_at  | TCIRG1                                 | 2.68 | 5.88E-03 | 2.15 | 2.54E-02 |
| 244352_at    | CD84                                   | 2.26 | 1.87E-02 | 2.15 | 1.87E-03 |
| 216240_at    | MIR1204 /// PVT1                       | 2.20 | 1.42E-02 | 2.15 | 6.23E-03 |
| 210804_x_at  | SLC8A1                                 | 2.57 | 1.22E-02 | 2.14 | 6.27E-03 |
| 201291_s_at  | TOP2A                                  | 4.58 | 3.49E-03 | 2.13 | 4.76E-02 |
| 214860_at    | SLC9A7                                 | 2.67 | 4.97E-02 | 2.13 | 4.89E-02 |
| 209670_at    | TRAC                                   | 2.85 | 3.82E-02 | 2.09 | 4.30E-02 |
| 210133_at    | CCL11                                  | 2.59 | 6.76E-03 | 2.09 | 2.41E-02 |
| 238976_at    | ---                                    | 2.19 | 1.47E-02 | 2.09 | 7.46E-03 |
| 1563590_at   | ---                                    | 2.20 | 2.15E-02 | 2.08 | 8.69E-03 |
| 219316_s_at  | FLVCR2                                 | 2.07 | 3.60E-02 | 2.06 | 2.48E-02 |
| 211210_x_at  | SH2D1A                                 | 2.06 | 3.78E-02 | 2.06 | 1.90E-03 |
| 233855_at    | SCIMP                                  | 2.07 | 1.30E-02 | 2.06 | 1.14E-03 |
| 224249_at    | ---                                    | 2.33 | 4.18E-02 | 2.06 | 2.90E-02 |
| 220365_at    | ALLC                                   | 2.05 | 3.17E-02 | 2.05 | 2.65E-02 |
| 234973_at    | SLC38A5                                | 2.21 | 4.77E-02 | 2.05 | 9.34E-03 |
| 219282_s_at  | TRPV2                                  | 2.37 | 2.79E-03 | 2.05 | 9.30E-04 |
| 235629_at    | ---                                    | 2.13 | 4.82E-02 | 2.03 | 9.29E-03 |
| 208364_at    | INPP4A                                 | 2.30 | 3.40E-02 | 2.01 | 1.20E-03 |
| 204265_s_at  | GPSM3                                  | 2.55 | 1.10E-02 | 2.00 | 1.02E-03 |
| 1552671_a_at | SLC9A7                                 | 2.46 | 4.48E-03 | 1.99 | 1.64E-03 |

|              |                                      |      |          |      |          |
|--------------|--------------------------------------|------|----------|------|----------|
| 218600_at    | LIMD2                                | 2.66 | 5.21E-03 | 1.99 | 1.56E-02 |
| 211188_at    | CD84                                 | 2.83 | 1.32E-02 | 1.98 | 2.70E-02 |
| 236673_at    | TIFAB                                | 2.32 | 2.88E-02 | 1.97 | 4.12E-02 |
| 229635_at    | LOC100505702                         | 2.90 | 3.18E-02 | 1.96 | 2.92E-02 |
| 1567687_at   | CECR9                                | 1.95 | 4.78E-02 | 1.95 | 3.55E-02 |
| 202580_x_at  | FOXMI                                | 2.03 | 8.97E-03 | 1.94 | 9.31E-04 |
| 213888_s_at  | TRAF3IP3                             | 2.30 | 4.75E-02 | 1.93 | 4.22E-02 |
| 239769_at    | ---                                  | 2.70 | 1.61E-02 | 1.93 | 4.91E-02 |
| 241234_at    | LOC100506797                         | 1.86 | 2.67E-02 | 1.93 | 4.27E-02 |
| 201631_s_at  | IER3                                 | 2.56 | 2.55E-02 | 1.90 | 1.48E-02 |
| 203379_at    | RPS6KA1                              | 2.69 | 2.08E-02 | 1.89 | 3.58E-02 |
| 210052_s_at  | TPX2                                 | 2.32 | 2.87E-02 | 1.89 | 1.71E-02 |
| 1566043_at   | ---                                  | 2.24 | 1.77E-02 | 1.89 | 2.97E-02 |
| 223987_at    | CHRD2                                | 1.97 | 2.11E-02 | 1.88 | 9.79E-03 |
| 218811_at    | ORAI2                                | 2.19 | 2.34E-02 | 1.88 | 5.67E-03 |
| 227487_s_at  | SERPINE2                             | 2.25 | 4.71E-02 | 1.88 | 2.58E-02 |
| 227828_s_at  | EVA1A                                | 2.43 | 3.17E-03 | 1.87 | 2.30E-02 |
| 217424_at    | ---                                  | 2.20 | 2.81E-02 | 1.87 | 2.31E-02 |
| 229479_at    | ---                                  | 1.97 | 4.57E-02 | 1.87 | 3.33E-02 |
| 206485_at    | CD5                                  | 2.39 | 2.39E-02 | 1.86 | 1.83E-02 |
| 1568846_at   | ---                                  | 1.89 | 4.83E-02 | 1.85 | 4.86E-03 |
| 218913_s_at  | GMIP                                 | 2.54 | 3.15E-02 | 1.85 | 4.54E-02 |
| 1555447_at   | GPR114                               | 2.23 | 2.50E-02 | 1.85 | 1.09E-02 |
| 204561_x_at  | APOC2 /// APOC4 /// APOC4-APOC2      | 2.77 | 7.85E-03 | 1.85 | 4.24E-02 |
| 1555282_a_at | PPARGC1B                             | 1.86 | 4.94E-02 | 1.84 | 8.58E-03 |
| 1565660_at   | FUT6                                 | 2.11 | 1.57E-02 | 1.82 | 1.92E-02 |
| 203805_s_at  | FANCA                                | 2.39 | 1.25E-02 | 1.82 | 2.99E-03 |
| 236943_at    | ---                                  | 1.84 | 4.12E-02 | 1.82 | 6.82E-04 |
| 1565754_x_at | FGD2                                 | 2.23 | 1.85E-02 | 1.82 | 1.65E-02 |
| 216316_x_at  | OTTHUMG00000161327 /// RP11-548H18.2 | 1.89 | 1.25E-02 | 1.81 | 3.49E-02 |
| 210784_x_at  | LILRA6 /// LILRB3                    | 2.25 | 1.26E-02 | 1.81 | 2.90E-02 |
| 218376_s_at  | MICAL1                               | 2.08 | 4.87E-02 | 1.81 | 1.17E-02 |
| 1552787_at   | HELB                                 | 2.28 | 2.03E-02 | 1.81 | 2.23E-02 |
| 202997_s_at  | LOXL2                                | 1.96 | 3.67E-02 | 1.80 | 1.64E-03 |
| 211178_s_at  | PSTPIP1                              | 2.17 | 1.27E-02 | 1.80 | 4.00E-02 |
| 206890_at    | IL12RB1                              | 1.99 | 4.32E-02 | 1.80 | 3.03E-02 |
| 232607_at    | ---                                  | 1.90 | 8.79E-03 | 1.79 | 4.61E-03 |
| 1561194_at   | ---                                  | 2.39 | 1.04E-02 | 1.79 | 1.68E-02 |
| 1554258_a_at | DNAJC5B                              | 2.08 | 1.05E-02 | 1.79 | 4.94E-02 |
| 241780_at    | ---                                  | 2.61 | 1.48E-02 | 1.78 | 2.49E-02 |
| 1569003_at   | VMP1                                 | 1.88 | 4.90E-02 | 1.78 | 2.39E-02 |
| 223876_at    | SPATA16                              | 2.11 | 9.95E-03 | 1.78 | 9.03E-03 |
| 216015_s_at  | NLRP3                                | 2.39 | 1.44E-02 | 1.78 | 7.65E-03 |
| 217689_at    | PTPN1                                | 2.14 | 2.02E-02 | 1.77 | 2.54E-02 |
| 1555678_at   | ST3GAL3                              | 2.16 | 1.74E-02 | 1.77 | 3.65E-02 |
| 223583_at    | TNFAIP8L2                            | 2.70 | 1.38E-04 | 1.77 | 3.08E-02 |
| 1556471_at   | SCML4                                | 2.26 | 2.03E-02 | 1.77 | 2.52E-02 |
| 211791_s_at  | KCNAB2                               | 2.25 | 3.21E-02 | 1.76 | 5.54E-03 |
| 1555096_at   | STPG2                                | 2.10 | 3.48E-02 | 1.76 | 2.18E-02 |
| 206881_s_at  | LILRA3                               | 2.26 | 1.58E-02 | 1.75 | 1.92E-03 |
| 230850_at    | ---                                  | 2.38 | 6.57E-03 | 1.74 | 7.48E-03 |
| 221414_s_at  | DEFB126                              | 2.23 | 6.61E-03 | 1.74 | 2.19E-02 |
| 232498_at    | LOC377711 /// MROH1                  | 2.33 | 7.66E-03 | 1.73 | 1.89E-02 |

|              |                                     |      |          |      |          |
|--------------|-------------------------------------|------|----------|------|----------|
| 205643_s_at  | PPP2R2B                             | 1.82 | 2.50E-02 | 1.73 | 2.10E-02 |
| 211133_x_at  | LILRA6 /// LILRB3                   | 2.44 | 1.58E-03 | 1.73 | 2.37E-02 |
| 210457_x_at  | HMGA1                               | 2.00 | 4.83E-02 | 1.72 | 5.76E-03 |
|              | TRAJ20 /// TRAJ20 /// TRAV36DV7 /// |      |          |      |          |
| 217056_at    | TRAV36DV7                           | 1.72 | 3.50E-02 | 1.72 | 3.08E-03 |
| 210225_x_at  | LILRA6 /// LILRB3                   | 2.15 | 1.45E-02 | 1.72 | 4.51E-02 |
| 207111_at    | EMR1                                | 2.12 | 2.73E-02 | 1.72 | 2.72E-02 |
| 209367_at    | STXBP2                              | 2.19 | 4.20E-02 | 1.72 | 3.78E-02 |
| 228685_at    | IL17RA                              | 1.99 | 3.33E-02 | 1.71 | 7.53E-03 |
| 215937_at    | PTGDR                               | 1.88 | 4.75E-02 | 1.71 | 1.48E-02 |
| 41660_at     | CELSR1                              | 2.07 | 2.63E-02 | 1.71 | 2.15E-02 |
| 234412_at    | ---                                 | 2.40 | 2.07E-02 | 1.70 | 2.37E-02 |
| 233358_at    | ---                                 | 2.00 | 2.76E-02 | 1.70 | 1.98E-03 |
| 235437_at    | ---                                 | 2.42 | 1.41E-02 | 1.70 | 1.65E-02 |
| 216337_at    | ---                                 | 2.20 | 4.10E-02 | 1.69 | 1.60E-02 |
| 1562562_at   | ANKUB1                              | 2.76 | 2.50E-02 | 1.69 | 2.52E-02 |
| 221807_s_at  | TRABD                               | 2.06 | 2.19E-02 | 1.68 | 4.08E-03 |
| 215926_x_at  | SNAPC4                              | 1.91 | 2.46E-02 | 1.68 | 5.75E-03 |
| 212443_at    | NBEAL2                              | 1.93 | 2.78E-02 | 1.67 | 1.06E-02 |
| 221334_s_at  | FOXP3                               | 2.15 | 1.13E-02 | 1.66 | 1.69E-02 |
| 1553647_at   | CDYL2                               | 1.76 | 3.17E-02 | 1.66 | 1.39E-02 |
| 223545_at    | FANCD2                              | 2.04 | 2.26E-02 | 1.66 | 2.98E-02 |
| 232830_at    | RNF32                               | 1.92 | 1.86E-02 | 1.65 | 2.40E-02 |
| 1561718_at   | ---                                 | 1.81 | 4.69E-02 | 1.65 | 8.25E-03 |
| 219332_at    | MICALL2                             | 1.89 | 4.55E-02 | 1.64 | 3.50E-03 |
| 208175_s_at  | DMP1                                | 1.98 | 8.51E-03 | 1.64 | 2.56E-02 |
| 211543_s_at  | GRK6                                | 1.81 | 4.93E-02 | 1.64 | 3.66E-03 |
| 237030_at    | ACPP                                | 1.71 | 4.85E-02 | 1.64 | 4.94E-02 |
| 236322_at    | ---                                 | 2.00 | 4.44E-02 | 1.64 | 3.19E-02 |
| 229971_at    | GPR114                              | 2.19 | 8.47E-03 | 1.62 | 4.50E-02 |
| 202850_at    | ABCD3                               | 2.16 | 3.87E-02 | 1.62 | 1.15E-02 |
| 215334_at    | EFR3B                               | 1.86 | 4.70E-02 | 1.61 | 2.87E-02 |
| 240052_at    | ITPR1                               | 2.02 | 4.52E-02 | 1.61 | 4.38E-02 |
| 216892_at    | IGHG1                               | 2.03 | 1.07E-02 | 1.61 | 2.01E-02 |
| 242993_at    | ---                                 | 1.98 | 8.89E-03 | 1.60 | 6.52E-03 |
| 1562306_at   | ---                                 | 1.74 | 2.58E-02 | 1.60 | 3.99E-02 |
| 220655_at    | TNIP3                               | 1.97 | 4.29E-02 | 1.60 | 1.54E-02 |
| 206298_at    | ARHGAP22                            | 1.98 | 3.68E-02 | 1.59 | 4.29E-02 |
| 227544_at    | TMEM229B                            | 2.01 | 4.11E-02 | 1.58 | 9.35E-03 |
| 237153_at    | ---                                 | 1.99 | 4.93E-02 | 1.58 | 4.68E-02 |
| 1558167_a_at | MGC16275                            | 1.89 | 4.41E-02 | 1.58 | 1.14E-02 |
| 221293_s_at  | DEF6                                | 2.06 | 4.67E-02 | 1.57 | 2.42E-02 |
| 207746_at    | POLQ                                | 1.99 | 9.43E-03 | 1.57 | 7.21E-03 |
| 219748_at    | TREML2                              | 1.78 | 4.36E-02 | 1.57 | 3.18E-02 |
| 232175_at    | ARF1                                | 2.29 | 2.55E-03 | 1.56 | 3.00E-02 |
| 242381_x_at  | ---                                 | 2.29 | 1.88E-03 | 1.55 | 4.08E-02 |
| 239701_at    | ---                                 | 2.19 | 1.04E-02 | 1.55 | 3.82E-02 |
| 1557669_at   | LOC100132005                        | 1.94 | 3.57E-02 | 1.54 | 3.25E-02 |
| 1552637_at   | PTPN11                              | 2.13 | 1.52E-02 | 1.52 | 4.78E-02 |
| 221924_at    | ZMIZ2                               | 1.94 | 3.59E-02 | 1.52 | 8.91E-03 |
| 240238_at    | ---                                 | 1.91 | 1.91E-02 | 1.51 | 1.93E-02 |

**Supplemental Table 2.** Probe sets indicating decreased expression of genes in anterior orbit tissues from subjects with GPA compared to uninflamed control tissues.

| Probe Set    | Gene Symbol             | Fold Difference | FDR P-value | Fold Difference | FDR P-value |
|--------------|-------------------------|-----------------|-------------|-----------------|-------------|
| 209613_s_at  | ADH1B                   | -68.60          | 2.24E-04    | -129.19         | 1.75E-06    |
| 205913_at    | PLIN1                   | -143.00         | 1.25E-04    | -121.91         | 1.11E-05    |
| 209612_s_at  | ADH1B                   | -105.20         | 5.19E-05    | -110.27         | 8.66E-06    |
| 226304_at    | HSPB6                   | -13.64          | 1.57E-03    | -80.10          | 9.01E-06    |
| 1565162_s_at | MGST1                   | -37.42          | 1.95E-04    | -69.65          | 8.09E-07    |
| 205478_at    | PPP1R1A                 | -54.07          | 5.49E-05    | -69.20          | 3.00E-06    |
| 214767_s_at  | HSPB6                   | -15.37          | 2.29E-03    | -69.19          | 9.95E-06    |
| 207175_at    | ADIPOQ                  | -91.04          | 2.35E-04    | -67.65          | 2.89E-05    |
| 224918_x_at  | MGST1                   | -15.45          | 7.38E-05    | -56.82          | 1.08E-05    |
| 201540_at    | FHL1                    | -25.32          | 6.97E-04    | -55.33          | 2.54E-05    |
| 231736_x_at  | MGST1                   | -19.60          | 9.21E-05    | -55.13          | 4.83E-06    |
| 219398_at    | CIDEC                   | -47.89          | 3.18E-05    | -52.73          | 1.65E-05    |
| 209283_at    | CRYAB                   | -10.13          | 2.11E-03    | -46.48          | 4.25E-05    |
| 203980_at    | FABP4                   | -43.92          | 4.28E-04    | -44.16          | 9.18E-05    |
| 209699_x_at  | AKR1C2 /// LOC101060798 | -33.58          | 5.20E-06    | -42.33          | 1.65E-05    |
| 204151_x_at  | AKR1C1                  | -17.12          | 3.04E-05    | -40.77          | 1.76E-05    |
| 212097_at    | CAV1                    | -14.11          | 7.32E-04    | -39.56          | 6.29E-05    |
| 225420_at    | GPAM                    | -48.61          | 8.73E-05    | -38.56          | 9.04E-05    |
| 211356_x_at  | LEPR                    | -24.20          | 4.22E-04    | -37.59          | 4.87E-06    |
| 203324_s_at  | CAV2                    | -12.07          | 5.31E-03    | -35.52          | 2.89E-06    |
| 222513_s_at  | SORBS1                  | -10.64          | 1.67E-03    | -34.00          | 8.86E-05    |
| 222124_at    | HIF3A                   | -18.41          | 5.96E-03    | -31.88          | 6.02E-05    |
| 221796_at    | NTRK2                   | -18.69          | 2.24E-04    | -30.75          | 1.31E-05    |
| 210299_s_at  | FHL1                    | -17.45          | 1.24E-03    | -29.40          | 9.02E-05    |
| 211355_x_at  | LEPR                    | -20.35          | 6.21E-04    | -28.82          | 1.27E-05    |
| 229476_s_at  | THRSP                   | -20.58          | 2.24E-04    | -28.73          | 4.43E-05    |
| 228766_at    | CD36                    | -27.10          | 3.70E-04    | -28.58          | 8.81E-05    |
| 203407_at    | PPL                     | -17.08          | 8.92E-06    | -27.81          | 1.11E-06    |
| 211354_s_at  | LEPR                    | -17.91          | 8.46E-04    | -27.27          | 7.88E-06    |
| 209555_s_at  | CD36                    | -34.54          | 1.22E-03    | -27.21          | 2.79E-04    |
| 219140_s_at  | RBP4                    | -23.29          | 6.10E-06    | -27.16          | 1.87E-05    |
| 216594_x_at  | AKR1C1                  | -16.78          | 8.65E-06    | -27.11          | 2.07E-05    |
| 202036_s_at  | SFRP1                   | -31.23          | 1.21E-05    | -27.05          | 2.42E-07    |
| 218087_s_at  | SORBS1                  | -11.54          | 1.36E-02    | -26.96          | 1.30E-05    |
| 228854_at    | ---                     | -8.76           | 2.75E-02    | -26.56          | 2.93E-05    |
| 212230_at    | PPAP2B                  | -13.57          | 1.30E-03    | -26.03          | 7.54E-06    |
| 221748_s_at  | TNS1                    | -9.92           | 2.77E-04    | -25.36          | 9.14E-04    |
| 201432_at    | CAT                     | -10.70          | 1.20E-03    | -25.30          | 2.14E-05    |



|              |                         |        |          |        |          |
|--------------|-------------------------|--------|----------|--------|----------|
| 213524_s_at  | GOS2                    | -13.65 | 4.73E-03 | -24.89 | 1.41E-04 |
| 211653_x_at  | AKR1C2 /// LOC101060798 | -31.90 | 6.16E-06 | -24.69 | 1.16E-04 |
| 205498_at    | GHR                     | -19.66 | 1.40E-04 | -24.45 | 7.97E-06 |
| 222835_at    | THSD4                   | -13.50 | 2.27E-03 | -24.22 | 6.56E-05 |
| 222484_s_at  | CXCL14                  | -5.60  | 4.36E-02 | -23.53 | 1.30E-03 |
| 204894_s_at  | AOC3                    | -30.59 | 2.46E-04 | -22.59 | 2.55E-05 |
| 225207_at    | PDK4                    | -13.50 | 1.04E-02 | -21.80 | 8.69E-05 |
| 214505_s_at  | FHL1                    | -8.35  | 1.62E-03 | -21.64 | 2.30E-03 |
| 202016_at    | MEST                    | -19.57 | 2.23E-04 | -21.60 | 9.30E-06 |
| 202037_s_at  | SFRP1                   | -21.29 | 1.77E-04 | -21.04 | 5.91E-08 |
| 228224_at    | PRELP                   | -6.57  | 1.93E-02 | -21.02 | 7.12E-06 |
| 209894_at    | LEPR                    | -16.24 | 5.24E-04 | -20.75 | 2.80E-06 |
| 1555740_a_at | MRAP                    | -19.05 | 3.34E-04 | -20.58 | 4.22E-05 |
| 203851_at    | IGFBP6                  | -9.38  | 1.10E-03 | -20.16 | 3.77E-06 |
| 212226_s_at  | PPAP2B                  | -8.97  | 4.23E-04 | -19.72 | 5.17E-04 |
| 209763_at    | CHRD1                   | -16.42 | 9.03E-04 | -19.39 | 6.03E-06 |
| 243585_at    | ATP13A5                 | -14.16 | 3.23E-04 | -19.16 | 6.14E-06 |
| 212071_s_at  | SPTBN1                  | -6.58  | 2.51E-03 | -19.02 | 4.42E-04 |
| 201525_at    | APOD                    | -4.64  | 7.20E-03 | -18.85 | 1.02E-03 |
| 204719_at    | ABCA8                   | -21.77 | 7.39E-04 | -18.77 | 8.67E-06 |
| 206488_s_at  | CD36                    | -27.27 | 7.16E-04 | -18.61 | 8.01E-04 |
| 225975_at    | PCDH18                  | -16.49 | 1.15E-04 | -18.31 | 3.06E-06 |
| 229477_at    | THRSP                   | -22.67 | 5.94E-05 | -18.25 | 3.47E-04 |
| 210963_s_at  | GYG2                    | -20.66 | 4.64E-04 | -18.21 | 6.38E-05 |
| 211959_at    | IGFBP5                  | -9.01  | 9.98E-03 | -18.21 | 1.56E-04 |
| 206243_at    | TIMP4                   | -9.02  | 4.52E-03 | -18.13 | 5.55E-05 |
| 221795_at    | NTRK2                   | -9.57  | 5.88E-03 | -18.08 | 6.62E-06 |
| 212741_at    | MAOA                    | -16.69 | 1.37E-04 | -18.01 | 2.38E-06 |
| 203323_at    | CAV2                    | -14.34 | 1.64E-04 | -17.94 | 5.28E-06 |
| 219789_at    | NPR3                    | -15.40 | 4.13E-04 | -17.67 | 7.73E-07 |
| 227646_at    | EBF1                    | -9.45  | 2.29E-03 | -17.15 | 1.28E-05 |
| 203571_s_at  | ADIRF                   | -7.67  | 2.98E-04 | -16.93 | 3.89E-05 |
| 235978_at    | FABP4                   | -23.77 | 9.51E-05 | -16.39 | 2.18E-04 |
| 200696_s_at  | GSN                     | -4.78  | 3.27E-04 | -16.37 | 5.03E-05 |
| 201427_s_at  | SEPP1                   | -9.47  | 9.21E-03 | -16.37 | 2.19E-03 |
| 228409_at    | PLIN4                   | -14.73 | 1.07E-04 | -16.29 | 4.83E-04 |
| 209355_s_at  | PPAP2B                  | -11.09 | 1.63E-04 | -16.23 | 3.47E-04 |
| 49452_at     | ACACB                   | -20.14 | 2.54E-05 | -16.09 | 2.90E-04 |
| 207276_at    | CDR1                    | -15.60 | 5.33E-04 | -16.05 | 4.85E-06 |
| 214040_s_at  | GSN                     | -4.44  | 1.42E-03 | -15.89 | 1.22E-04 |
| 212148_at    | PBX1                    | -10.84 | 2.62E-03 | -15.89 | 1.68E-05 |
| 216048_s_at  | RHOBTB3                 | -10.85 | 8.91E-04 | -15.60 | 3.07E-04 |
| 203680_at    | PRKAR2B                 | -8.95  | 1.59E-03 | -15.17 | 3.02E-05 |

|              |                                 |        |          |        |          |
|--------------|---------------------------------|--------|----------|--------|----------|
| 212713_at    | MFAP4                           | -9.68  | 9.32E-04 | -15.09 | 2.06E-05 |
| 212667_at    | SPARC                           | -7.00  | 4.12E-02 | -14.91 | 1.49E-03 |
| 204223_at    | PRELP                           | -4.63  | 2.90E-02 | -14.82 | 1.32E-04 |
| 43427_at     | ACACB                           | -14.13 | 2.32E-05 | -14.76 | 9.21E-05 |
| 201150_s_at  | TIMP3                           | -5.74  | 2.11E-02 | -14.75 | 1.46E-03 |
| 201785_at    | RNASE1                          | -5.99  | 8.03E-04 | -14.62 | 4.10E-04 |
| 204141_at    | TUBB2A                          | -9.16  | 9.21E-03 | -14.58 | 1.45E-04 |
| 212509_s_at  | MXRA7                           | -5.00  | 1.31E-02 | -14.57 | 9.87E-05 |
| 217889_s_at  | CYBRD1                          | -4.89  | 5.15E-03 | -14.49 | 9.50E-05 |
| 202035_s_at  | SFRP1                           | -21.78 | 3.17E-05 | -14.48 | 2.99E-05 |
| 203065_s_at  | CAV1                            | -11.12 | 1.07E-04 | -14.18 | 2.87E-04 |
| 236565_s_at  | LARP6                           | -6.56  | 4.87E-03 | -14.16 | 5.83E-06 |
| 226834_at    | ---                             | -9.44  | 3.72E-03 | -14.15 | 6.59E-05 |
| 209210_s_at  | FERMT2                          | -7.11  | 3.37E-02 | -14.09 | 1.16E-04 |
| 200672_x_at  | SPTBN1                          | -4.99  | 1.76E-03 | -14.06 | 2.35E-04 |
| 229839_at    | SCARA5                          | -22.63 | 4.47E-04 | -14.04 | 1.15E-06 |
| 1555997_s_at | IGFBP5                          | -5.21  | 3.01E-02 | -14.04 | 1.41E-03 |
| 201348_at    | GPX3                            | -5.71  | 3.51E-02 | -13.78 | 5.07E-03 |
| 212336_at    | EPB41L1                         | -9.10  | 7.17E-04 | -13.76 | 4.23E-05 |
| 205392_s_at  | CCL14 /// CCL15 /// CCL15-CCL14 | -8.76  | 3.15E-04 | -13.76 | 5.18E-05 |
| 215096_s_at  | ESD                             | -9.81  | 1.30E-02 | -13.71 | 2.57E-03 |
| 213800_at    | CFH                             | -12.71 | 1.38E-03 | -13.53 | 6.60E-07 |
| 214680_at    | NTRK2                           | -9.11  | 1.02E-04 | -13.44 | 4.79E-06 |
| 209686_at    | S100B                           | -9.86  | 1.05E-04 | -13.43 | 4.16E-06 |
| 222722_at    | OGN                             | -7.60  | 3.15E-02 | -13.28 | 1.02E-03 |
| 214110_s_at  | LOC654342                       | -8.51  | 3.65E-04 | -13.28 | 7.43E-07 |
| 225424_at    | GPAM                            | -14.23 | 2.30E-04 | -13.10 | 1.42E-04 |
| 210298_x_at  | FHL1                            | -11.14 | 1.51E-03 | -13.08 | 4.08E-03 |
| 226806_s_at  | NFIA                            | -17.02 | 2.22E-05 | -12.97 | 1.10E-06 |
| 1556919_at   | LEPR                            | -15.45 | 2.42E-04 | -12.79 | 1.03E-04 |
| 203002_at    | AMOTL2                          | -10.15 | 7.58E-04 | -12.74 | 1.57E-05 |
| 200602_at    | APP                             | -7.37  | 4.11E-02 | -12.61 | 1.36E-02 |
| 202481_at    | DHRS3                           | -5.28  | 1.38E-02 | -12.60 | 1.54E-04 |
| 205382_s_at  | CFD                             | -15.92 | 1.05E-05 | -12.43 | 8.42E-06 |
| 226625_at    | TGFBR3                          | -16.33 | 3.27E-04 | -12.33 | 4.79E-06 |
| 217731_s_at  | ITM2B                           | -9.24  | 2.84E-02 | -12.30 | 2.41E-03 |
| 218736_s_at  | PALMD                           | -5.98  | 1.25E-03 | -12.30 | 3.42E-05 |
| 205330_at    | MN1                             | -8.13  | 2.48E-03 | -12.28 | 6.18E-05 |
| 214584_x_at  | ACACB                           | -23.62 | 9.70E-05 | -12.12 | 2.46E-04 |
| 201425_at    | ALDH2                           | -10.58 | 1.05E-05 | -12.08 | 8.50E-04 |
| 203549_s_at  | LPL                             | -9.08  | 3.95E-02 | -12.05 | 4.58E-04 |
| 1556069_s_at | HIF3A                           | -5.76  | 4.36E-02 | -12.02 | 3.37E-04 |
| 204154_at    | CDO1                            | -7.63  | 1.53E-03 | -12.01 | 1.57E-05 |

|              |                         |        |          |        |          |
|--------------|-------------------------|--------|----------|--------|----------|
| 207761_s_at  | METTL7A                 | -6.70  | 2.09E-02 | -11.93 | 1.55E-03 |
| 213397_x_at  | RNASE4                  | -10.31 | 2.54E-03 | -11.91 | 1.96E-06 |
| 219059_s_at  | LYVE1                   | -10.55 | 9.36E-03 | -11.89 | 6.88E-05 |
| 228949_at    | WLS                     | -6.57  | 2.17E-02 | -11.88 | 1.20E-04 |
| 235849_at    | SCARA5                  | -10.45 | 1.06E-03 | -11.87 | 1.28E-06 |
| 219304_s_at  | PDGFD                   | -6.06  | 4.98E-02 | -11.85 | 8.86E-05 |
| 216191_s_at  | TRDV3                   | -8.36  | 4.40E-03 | -11.63 | 1.75E-06 |
| 204388_s_at  | MAOA                    | -15.06 | 1.23E-04 | -11.52 | 1.35E-05 |
| 210964_s_at  | GYG2                    | -8.72  | 3.38E-03 | -11.49 | 8.82E-05 |
| 219153_s_at  | THSD4                   | -13.06 | 3.11E-04 | -11.44 | 3.18E-04 |
| 201984_s_at  | EGFR                    | -8.49  | 2.64E-03 | -11.37 | 9.87E-05 |
| 219295_s_at  | PCOLCE2                 | -6.36  | 1.04E-02 | -11.35 | 3.31E-05 |
| 229487_at    | EBF1                    | -8.93  | 6.65E-04 | -11.32 | 9.63E-06 |
| 218730_s_at  | OGN                     | -8.11  | 1.86E-02 | -11.32 | 1.23E-03 |
| 203425_s_at  | IGFBP5                  | -3.51  | 1.12E-02 | -11.31 | 6.97E-04 |
| 207057_at    | SLC16A7                 | -8.94  | 3.94E-03 | -11.21 | 6.70E-04 |
| 200718_s_at  | SKP1                    | -6.74  | 1.43E-02 | -11.21 | 6.53E-03 |
| 222453_at    | CYBRD1                  | -4.92  | 1.28E-02 | -11.18 | 1.31E-05 |
| 201149_s_at  | TIMP3                   | -3.15  | 4.32E-02 | -11.12 | 2.90E-03 |
| 214143_x_at  | RPL24                   | -3.56  | 3.65E-02 | -11.10 | 8.95E-03 |
| 227400_at    | NFIX                    | -5.68  | 2.92E-03 | -11.00 | 3.52E-05 |
| 211458_s_at  | GABARAPL1 /// GABARAPL3 | -7.09  | 1.22E-02 | -10.83 | 7.64E-04 |
| 225627_s_at  | CACHD1                  | -17.82 | 1.93E-05 | -10.80 | 1.40E-06 |
| 238718_at    | ---                     | -11.76 | 4.33E-04 | -10.74 | 1.89E-06 |
| 203430_at    | HEBP2                   | -7.31  | 1.91E-03 | -10.72 | 5.91E-05 |
| 210946_at    | PPAP2A                  | -8.98  | 7.87E-03 | -10.71 | 2.54E-04 |
| 202260_s_at  | STXBP1                  | -6.54  | 8.32E-05 | -10.61 | 1.28E-05 |
| 201885_s_at  | CYB5R3                  | -4.38  | 3.33E-03 | -10.54 | 9.36E-04 |
| 201983_s_at  | EGFR                    | -9.23  | 4.16E-04 | -10.48 | 1.18E-05 |
| 202336_s_at  | PAM                     | -5.20  | 4.99E-02 | -10.48 | 4.66E-04 |
| 217800_s_at  | NDFIP1                  | -8.02  | 8.82E-03 | -10.46 | 1.15E-03 |
| 1560698_a_at | TRHDE-AS1               | -13.69 | 1.29E-03 | -10.38 | 6.53E-05 |
| 202973_x_at  | FAM13A                  | -6.11  | 2.60E-02 | -10.36 | 9.81E-07 |
| 224435_at    | FAM213A                 | -7.63  | 1.46E-03 | -10.35 | 9.09E-05 |
| 204755_x_at  | HLF                     | -7.55  | 1.69E-03 | -10.32 | 5.45E-07 |
| 205236_x_at  | SOD3                    | -3.62  | 1.25E-03 | -10.32 | 1.39E-04 |
| 214003_x_at  | RPS20 /// SNORD54       | -3.14  | 4.11E-02 | -10.31 | 1.45E-02 |
| 1556427_s_at | LRRN4CL                 | -12.47 | 6.15E-03 | -10.31 | 5.84E-07 |
| 209488_s_at  | RBPMS                   | -9.83  | 1.40E-03 | -10.28 | 4.96E-03 |
| 217890_s_at  | PARVA                   | -5.97  | 2.84E-03 | -10.28 | 1.16E-04 |
| 209160_at    | AKR1C3                  | -10.26 | 2.21E-04 | -10.25 | 5.44E-04 |
| 224975_at    | NFIA                    | -7.00  | 1.20E-02 | -10.23 | 1.18E-04 |
| 202409_at    | IGF2                    | -7.85  | 8.62E-04 | -10.22 | 1.95E-03 |

|             |                                    |        |          |        |          |
|-------------|------------------------------------|--------|----------|--------|----------|
| 215039_at   | LOC339524                          | -12.69 | 9.07E-04 | -10.16 | 1.62E-06 |
| 209543_s_at | CD34                               | -8.02  | 3.06E-04 | -10.14 | 6.14E-06 |
| 211958_at   | IGFBP5                             | -4.21  | 3.83E-03 | -10.10 | 9.25E-05 |
| 221814_at   | GPR124                             | -5.02  | 1.26E-02 | -10.09 | 1.44E-03 |
| 235708_at   | KLB                                | -12.62 | 8.31E-05 | -10.05 | 1.97E-05 |
| 223623_at   | C2orf40                            | -11.33 | 5.22E-03 | -10.01 | 3.18E-04 |
| 226377_at   | NFIC                               | -5.32  | 9.73E-03 | -9.98  | 1.56E-04 |
| 224743_at   | IMPAD1                             | -6.59  | 2.37E-03 | -9.94  | 8.99E-04 |
| 226763_at   | SESTD1                             | -4.89  | 8.02E-03 | -9.87  | 1.07E-04 |
| 232712_at   | ---                                | -9.34  | 1.18E-03 | -9.85  | 8.88E-08 |
| 209289_at   | NFIB                               | -5.94  | 3.90E-02 | -9.83  | 1.56E-04 |
| 225202_at   | RHOBTB3                            | -8.41  | 6.84E-03 | -9.82  | 6.70E-05 |
| 229563_s_at | RPL10A                             | -3.68  | 3.71E-02 | -9.77  | 1.89E-02 |
| 207302_at   | SGCG                               | -11.05 | 1.84E-04 | -9.76  | 9.87E-05 |
| 201061_s_at | STOM                               | -4.42  | 2.20E-02 | -9.74  | 3.08E-03 |
| 220037_s_at | LYVE1                              | -15.82 | 8.59E-03 | -9.72  | 8.43E-04 |
| 200845_s_at | PRDX6                              | -6.94  | 9.68E-03 | -9.69  | 4.03E-04 |
| 201963_at   | ACSL1                              | -11.03 | 6.22E-03 | -9.63  | 5.70E-04 |
| 203400_s_at | TF                                 | -11.21 | 7.87E-03 | -9.60  | 3.34E-03 |
| 227530_at   | AKAP12                             | -8.30  | 1.34E-02 | -9.60  | 1.29E-05 |
| 205083_at   | AOX1                               | -14.68 | 3.46E-03 | -9.60  | 3.86E-06 |
| 202017_at   | EPHX1                              | -7.02  | 1.05E-05 | -9.53  | 1.90E-04 |
| 219747_at   | NDNF                               | -11.52 | 2.43E-03 | -9.52  | 1.40E-05 |
| 218175_at   | CCDC92                             | -4.27  | 4.48E-02 | -9.49  | 2.36E-04 |
| 228155_at   | FAM213A                            | -6.51  | 7.50E-04 | -9.35  | 1.70E-04 |
| 1555854_at  | AKR1C1 /// AKR1C2 /// LOC101060798 | -5.90  | 1.51E-02 | -9.34  | 8.72E-06 |
| 204731_at   | TGFBR3                             | -12.78 | 8.46E-04 | -9.34  | 2.44E-05 |
| 205410_s_at | ATP2B4                             | -4.86  | 2.70E-02 | -9.26  | 4.47E-04 |
| 202565_s_at | SVIL                               | -5.26  | 1.46E-02 | -9.23  | 8.54E-05 |
| 213348_at   | CDKN1C                             | -10.90 | 5.91E-04 | -9.22  | 2.58E-05 |
| 204753_s_at | HLF                                | -6.40  | 1.14E-02 | -9.21  | 1.12E-06 |
| 221016_s_at | TCF7L1                             | -13.39 | 1.32E-05 | -9.21  | 1.79E-05 |
| 212339_at   | EPB41L1                            | -6.13  | 4.33E-04 | -9.15  | 7.06E-06 |
| 217525_at   | OLFML1                             | -5.16  | 1.40E-02 | -9.09  | 1.01E-05 |
| 227334_at   | USP54                              | -5.35  | 8.63E-03 | -9.02  | 1.97E-06 |
| 214629_x_at | RTN4                               | -5.63  | 1.86E-02 | -9.02  | 5.24E-03 |
| 210139_s_at | PMP22                              | -6.14  | 2.79E-02 | -9.02  | 2.56E-04 |
| 209541_at   | IGF1                               | -6.54  | 4.61E-02 | -9.01  | 3.73E-03 |
| 211110_s_at | AR                                 | -8.37  | 4.75E-04 | -9.01  | 4.28E-05 |
| 225381_at   | MIR100HG                           | -8.52  | 1.49E-02 | -9.00  | 6.97E-05 |
| 209343_at   | EFHD1                              | -8.03  | 1.50E-03 | -9.00  | 7.50E-06 |
| 201429_s_at | RPL37A                             | -2.92  | 3.61E-02 | -8.98  | 1.93E-02 |
| 213855_s_at | LIPE                               | -11.72 | 2.10E-04 | -8.91  | 4.72E-04 |

|              |                                      |        |          |       |          |
|--------------|--------------------------------------|--------|----------|-------|----------|
| 1552509_a_at | CD300LG                              | -9.30  | 6.31E-03 | -8.89 | 3.52E-03 |
| 205960_at    | PDK4                                 | -7.93  | 1.25E-02 | -8.88 | 1.00E-03 |
| 221747_at    | TNS1                                 | -7.71  | 3.30E-04 | -8.83 | 1.17E-04 |
| 206481_s_at  | LDB2                                 | -10.29 | 4.23E-03 | -8.77 | 2.38E-06 |
| 227373_at    | ATXN1L                               | -8.46  | 1.14E-02 | -8.74 | 2.08E-04 |
| 215726_s_at  | CYB5A                                | -7.44  | 6.54E-04 | -8.68 | 2.24E-03 |
| 239262_at    | OTTHUMG00000167230 /// RP11-736K20.4 | -6.81  | 5.69E-04 | -8.65 | 1.08E-05 |
| 229800_at    | DCLK1                                | -7.83  | 2.06E-02 | -8.62 | 1.61E-04 |
| 211922_s_at  | CAT                                  | -6.00  | 1.46E-03 | -8.60 | 8.47E-05 |
| 203424_s_at  | IGFBP5                               | -5.71  | 2.79E-03 | -8.59 | 1.04E-03 |
| 224996_at    | ASPH                                 | -6.03  | 3.93E-02 | -8.58 | 4.74E-04 |
| 211945_s_at  | ITGB1                                | -4.96  | 4.23E-02 | -8.55 | 4.53E-02 |
| 223727_at    | KCNIP2                               | -4.66  | 9.43E-03 | -8.52 | 1.86E-05 |
| 200878_at    | EPAS1                                | -6.22  | 1.27E-02 | -8.46 | 4.58E-03 |
| 201034_at    | ADD3                                 | -6.64  | 3.05E-02 | -8.42 | 3.97E-03 |
| 221246_x_at  | TNS1                                 | -5.13  | 1.51E-04 | -8.41 | 3.65E-03 |
| 1554574_a_at | CYB5R3                               | -3.35  | 3.44E-03 | -8.36 | 4.98E-04 |
| 228347_at    | SIX1                                 | -9.09  | 1.37E-04 | -8.35 | 2.75E-06 |
| 224895_at    | YAP1                                 | -8.10  | 1.88E-03 | -8.35 | 9.95E-04 |
| 211726_s_at  | FMO2                                 | -5.62  | 2.07E-02 | -8.33 | 1.52E-04 |
| 213706_at    | GPD1                                 | -5.55  | 6.79E-04 | -8.33 | 3.27E-04 |
| 227561_at    | DDR2                                 | -7.57  | 9.61E-04 | -8.32 | 2.87E-06 |
| 206767_at    | RBMS3                                | -6.04  | 2.44E-03 | -8.25 | 2.84E-05 |
| 225442_at    | DDR2                                 | -6.45  | 9.16E-04 | -8.24 | 3.99E-05 |
| 211819_s_at  | SORBS1                               | -7.15  | 2.99E-03 | -8.22 | 5.18E-04 |
| 201539_s_at  | FHL1                                 | -9.72  | 2.54E-03 | -8.21 | 2.99E-03 |
| 209807_s_at  | NFIX                                 | -4.98  | 6.75E-04 | -8.19 | 1.54E-04 |
| 202935_s_at  | SOX9                                 | -8.21  | 1.31E-03 | -8.17 | 4.05E-05 |
| 201106_at    | GPX4                                 | -3.31  | 5.28E-04 | -8.13 | 4.58E-05 |
| 209487_at    | RBPMS                                | -9.26  | 1.05E-03 | -8.10 | 1.20E-04 |
| 242197_x_at  | CD36                                 | -10.76 | 2.63E-02 | -8.06 | 6.21E-03 |
| 202976_s_at  | RHOBTB3                              | -7.77  | 2.03E-03 | -8.06 | 6.12E-04 |
| 207275_s_at  | ACSL1                                | -5.49  | 2.10E-02 | -8.04 | 7.78E-03 |
| 204688_at    | SGCE                                 | -5.99  | 8.27E-03 | -8.03 | 1.74E-04 |
| 1555230_a_at | KCNIP2                               | -11.41 | 4.02E-03 | -8.02 | 3.10E-04 |
| 219064_at    | ITIH5                                | -5.71  | 1.18E-03 | -8.02 | 4.27E-04 |
| 212650_at    | EHBP1                                | -5.49  | 5.83E-03 | -8.02 | 2.05E-03 |
| 235570_at    | RBMS3                                | -7.15  | 5.77E-03 | -8.00 | 9.30E-06 |
| 1558647_at   | SH3D19                               | -5.80  | 1.56E-03 | -7.95 | 1.08E-05 |
| 213068_at    | DPT                                  | -4.40  | 2.35E-02 | -7.93 | 1.98E-03 |
| 221012_s_at  | TRIM8                                | -4.99  | 6.94E-03 | -7.89 | 1.02E-04 |
| 227899_at    | VIT                                  | -8.95  | 2.48E-03 | -7.85 | 7.39E-06 |

|             |                                       |        |        |          |       |          |
|-------------|---------------------------------------|--------|--------|----------|-------|----------|
| 205908_s_at | OMD                                   |        | -6.72  | 2.65E-02 | -7.80 | 6.69E-05 |
| 226632_at   | CYGB                                  |        | -6.63  | 2.63E-03 | -7.79 | 3.73E-05 |
| 203632_s_at | GPRC5B                                |        | -6.42  | 2.05E-03 | -7.74 | 1.18E-04 |
| 201542_at   | SAR1A                                 |        | -5.39  | 1.83E-02 | -7.74 | 2.22E-03 |
| 208695_s_at | RPL39                                 |        | -3.77  | 1.49E-02 | -7.73 | 4.62E-02 |
|             | PCDHGA1 /// PCDHGA10 /// PCDHGA11 /// |        |        |          |       |          |
|             | PCDHGA12 /// PCDHGA2 /// PCDHGA3 ///  |        |        |          |       |          |
|             | PCDHGA4 /// PCDHGA5 /// PCDHGA6 ///   |        |        |          |       |          |
|             | PCDHGA7 /// PCDHGA8 /// PCDHGA9 ///   |        |        |          |       |          |
|             | PCDHGB1 /// PCDHGB2 /// PCDHGB3 ///   |        |        |          |       |          |
|             | PCDHGB4 /// PCDHGB5 /// PCDHGB6 ///   |        |        |          |       |          |
|             | PCDHGB7 /// PCDHGC3 /// PCDHGC4 ///   |        |        |          |       |          |
| 211066_x_at | PCDHGC5                               |        | -3.48  | 3.88E-02 | -7.72 | 1.58E-04 |
| 243368_at   | ---                                   |        | -6.18  | 3.95E-02 | -7.70 | 3.66E-03 |
| 225016_at   | APCDD1                                |        | -4.62  | 7.88E-03 | -7.69 | 1.81E-06 |
| 212218_s_at | FASN                                  |        | -4.35  | 4.30E-04 | -7.68 | 3.87E-02 |
| 201308_s_at |                                       | 11-Sep | -6.56  | 3.16E-03 | -7.64 | 3.01E-04 |
| 200872_at   | S100A10                               |        | -2.91  | 4.32E-02 | -7.61 | 2.63E-03 |
| 204955_at   | SRPX                                  |        | -5.79  | 1.65E-02 | -7.58 | 2.29E-04 |
|             | PCDHGA1 /// PCDHGA10 /// PCDHGA11 /// |        |        |          |       |          |
|             | PCDHGA12 /// PCDHGA2 /// PCDHGA3 ///  |        |        |          |       |          |
|             | PCDHGA4 /// PCDHGA5 /// PCDHGA6 ///   |        |        |          |       |          |
|             | PCDHGA7 /// PCDHGA8 /// PCDHGA9 ///   |        |        |          |       |          |
|             | PCDHGB1 /// PCDHGB2 /// PCDHGB3 ///   |        |        |          |       |          |
|             | PCDHGB4 /// PCDHGB5 /// PCDHGB6 ///   |        |        |          |       |          |
|             | PCDHGB7 /// PCDHGC3 /// PCDHGC4 ///   |        |        |          |       |          |
| 209079_x_at | PCDHGC5                               |        | -3.72  | 2.06E-02 | -7.54 | 1.33E-04 |
| 232204_at   | EBF1                                  |        | -8.59  | 8.78E-03 | -7.54 | 7.32E-05 |
| 212151_at   | PBX1                                  |        | -4.49  | 1.89E-02 | -7.51 | 1.70E-04 |
| 222116_s_at | TBC1D16                               |        | -6.36  | 2.53E-04 | -7.51 | 1.13E-07 |
| 214363_s_at | MATR3 /// SNHG4                       |        | -6.44  | 4.76E-02 | -7.49 | 3.45E-02 |
| 209154_at   | P2RX5-TAX1BP3 /// TAX1BP3             |        | -4.43  | 4.93E-02 | -7.47 | 2.14E-02 |
| 212670_at   | ELN                                   |        | -5.88  | 1.92E-03 | -7.47 | 8.38E-04 |
| 230319_at   | ---                                   |        | -11.85 | 7.39E-04 | -7.46 | 2.64E-05 |
| 207040_s_at | ST13                                  |        | -3.43  | 4.16E-02 | -7.45 | 4.39E-03 |
| 225162_at   | SH3D19                                |        | -5.81  | 2.12E-02 | -7.44 | 2.16E-05 |
| 200949_x_at | RPS20 /// SNORD54                     |        | -2.59  | 2.63E-02 | -7.44 | 1.37E-02 |
| 204112_s_at | HNMT                                  |        | -6.10  | 5.06E-03 | -7.39 | 3.52E-04 |
| 226169_at   | SBF2                                  |        | -7.50  | 7.84E-03 | -7.37 | 2.68E-04 |
| 212419_at   | ZCCHC24                               |        | -6.06  | 3.14E-04 | -7.37 | 1.67E-05 |
| 217892_s_at | LIMA1                                 |        | -6.21  | 1.54E-02 | -7.35 | 4.08E-03 |
| 211026_s_at | MGLL                                  |        | -5.90  | 7.18E-05 | -7.33 | 1.42E-03 |
| 208383_s_at | PCK1                                  |        | -14.29 | 5.66E-03 | -7.33 | 1.77E-03 |
| 212372_at   | MYH10                                 |        | -6.62  | 2.54E-03 | -7.32 | 4.46E-05 |
| 222423_at   | NDFIP1                                |        | -3.35  | 6.73E-03 | -7.31 | 6.59E-06 |
| 224881_at   | VKORC1L1                              |        | -6.29  | 1.48E-03 | -7.31 | 3.65E-05 |

|              |                                     |        |          |       |          |
|--------------|-------------------------------------|--------|----------|-------|----------|
| 209687_at    | CXCL12                              | -4.53  | 3.33E-02 | -7.31 | 8.75E-04 |
| 219689_at    | SEMA3G                              | -8.96  | 8.38E-04 | -7.30 | 8.18E-05 |
| 226018_at    | C7orf41                             | -7.13  | 3.93E-03 | -7.26 | 8.63E-06 |
| 209581_at    | PLA2G16                             | -8.51  | 2.61E-04 | -7.25 | 6.94E-05 |
| 1566472_s_at | LOC100996506 /// RETSAT             | -7.60  | 1.24E-04 | -7.23 | 4.10E-04 |
| 228728_at    | CPED1                               | -4.55  | 3.78E-02 | -7.19 | 1.31E-04 |
| 220736_at    | SLC19A3                             | -10.23 | 2.55E-03 | -7.19 | 3.95E-03 |
| 219779_at    | ZFHX4                               | -6.29  | 1.57E-02 | -7.14 | 6.09E-04 |
| 218665_at    | FZD4                                | -4.85  | 5.61E-03 | -7.14 | 2.40E-04 |
| 204235_s_at  | GULP1                               | -5.90  | 1.20E-03 | -7.14 | 4.28E-06 |
| 207092_at    | LEP                                 | -3.90  | 1.00E-02 | -7.13 | 8.40E-03 |
| 209047_at    | AQP1                                | -4.94  | 7.18E-03 | -7.12 | 1.21E-02 |
| 214761_at    | ZNF423                              | -5.75  | 1.47E-02 | -7.09 | 2.05E-05 |
| 229357_at    | ADAMTS5                             | -6.56  | 3.27E-02 | -7.08 | 3.28E-05 |
| 201324_at    | EMP1                                | -6.39  | 2.12E-02 | -7.08 | 5.17E-04 |
| 213075_at    | OLFML2A                             | -5.68  | 2.64E-02 | -7.06 | 3.28E-05 |
| 218656_s_at  | LHFP                                | -5.17  | 4.75E-02 | -7.04 | 2.24E-05 |
| 213347_x_at  | RPS4X                               | -3.23  | 3.40E-02 | -7.03 | 1.63E-02 |
| 224822_at    | DLC1                                | -6.47  | 1.81E-03 | -7.01 | 3.48E-05 |
| 204041_at    | MAOB                                | -7.79  | 4.20E-05 | -7.00 | 1.04E-04 |
| 218864_at    | TNS1                                | -4.92  | 3.37E-03 | -7.00 | 4.44E-04 |
| 201116_s_at  | CPE                                 | -4.31  | 3.13E-02 | -6.99 | 9.18E-05 |
| 237351_at    | LOC100652994                        | -6.81  | 9.10E-05 | -6.98 | 8.56E-06 |
| 203088_at    | FBLN5                               | -5.76  | 3.21E-03 | -6.97 | 1.08E-04 |
| 233571_x_at  | PPDPF                               | -2.42  | 4.70E-02 | -6.97 | 5.76E-03 |
| 205779_at    | RAMP2                               | -4.40  | 3.70E-03 | -6.97 | 1.59E-05 |
| 200026_at    | RPL34                               | -2.90  | 4.03E-02 | -6.97 | 4.09E-02 |
| 224970_at    | NFIA                                | -5.89  | 3.12E-03 | -6.96 | 1.67E-05 |
| 205883_at    | ZBTB16                              | -5.86  | 4.32E-03 | -6.93 | 3.59E-04 |
| 229319_at    | OTTHUMG00000175939 /// RP3-425C14.4 | -5.49  | 8.80E-03 | -6.89 | 1.55E-05 |
| 215617_at    | SPATS2L                             | -3.96  | 4.49E-02 | -6.88 | 5.18E-05 |
| 216321_s_at  | NR3C1                               | -6.98  | 2.11E-02 | -6.88 | 3.69E-03 |
| 220751_s_at  | FAXDC2                              | -3.30  | 5.80E-03 | -6.87 | 5.09E-06 |
| 209513_s_at  | HSDL2                               | -4.67  | 4.21E-03 | -6.86 | 1.76E-06 |
| 224597_at    | LINC00657                           | -5.06  | 4.46E-02 | -6.86 | 3.52E-04 |
| 204424_s_at  | LMO3                                | -7.61  | 2.21E-04 | -6.85 | 4.08E-05 |
| 201036_s_at  | HADH                                | -4.06  | 7.07E-03 | -6.84 | 5.89E-05 |
| 230418_s_at  | GALNT16                             | -9.87  | 9.80E-03 | -6.84 | 1.36E-04 |
| 219563_at    | LINC00341                           | -5.05  | 5.28E-04 | -6.83 | 1.15E-05 |
| 223349_s_at  | BOK                                 | -6.87  | 6.81E-05 | -6.83 | 3.38E-04 |
| 211453_s_at  | AKT2                                | -3.27  | 6.63E-03 | -6.82 | 1.33E-04 |
| 58780_s_at   | ARHGEF40                            | -5.36  | 1.05E-02 | -6.81 | 3.47E-05 |
| 202921_s_at  | ANK2                                | -6.76  | 1.08E-02 | -6.81 | 6.45E-04 |

|              |                                       |       |          |       |          |
|--------------|---------------------------------------|-------|----------|-------|----------|
| 204971_at    | CSTA                                  | -5.28 | 2.22E-02 | -6.80 | 1.82E-03 |
| 205082_s_at  | AOX1                                  | -4.79 | 2.74E-02 | -6.79 | 5.44E-05 |
| 1559388_a_at | LYNX1                                 | -4.26 | 5.81E-03 | -6.78 | 9.22E-05 |
| 223276_at    | SMIM3                                 | -6.43 | 6.52E-03 | -6.76 | 1.54E-03 |
| 207030_s_at  | CSRP2                                 | -4.40 | 3.19E-02 | -6.76 | 3.51E-04 |
| 200673_at    | LAPTM4A                               | -4.55 | 1.05E-02 | -6.75 | 7.69E-03 |
| 211698_at    | EID1                                  | -5.20 | 2.40E-02 | -6.71 | 2.89E-03 |
| 223601_at    | OLFM2                                 | -6.23 | 9.44E-04 | -6.70 | 2.63E-03 |
| 224604_at    | C4orf3                                | -3.51 | 4.43E-02 | -6.70 | 1.53E-04 |
| 212158_at    | SDC2                                  | -5.63 | 3.43E-02 | -6.70 | 1.21E-04 |
| 201828_x_at  | FAM127A                               | -3.20 | 2.67E-02 | -6.69 | 6.37E-04 |
| 225534_at    | SMIM19                                | -5.31 | 2.09E-02 | -6.68 | 8.65E-04 |
| 202551_s_at  | CRIM1                                 | -5.61 | 3.16E-02 | -6.67 | 4.35E-04 |
| 210519_s_at  | NQO1                                  | -4.50 | 2.54E-03 | -6.66 | 7.05E-05 |
| 227041_at    | SESTD1                                | -4.64 | 1.07E-02 | -6.65 | 1.47E-05 |
| 207764_s_at  | HIPK3                                 | -3.66 | 2.72E-02 | -6.64 | 1.55E-02 |
| 207076_s_at  | ASS1                                  | -6.25 | 2.95E-04 | -6.62 | 1.82E-04 |
| 200795_at    | SPARCL1                               | -4.76 | 1.47E-02 | -6.56 | 4.38E-02 |
| 227529_s_at  | AKAP12                                | -7.47 | 3.80E-03 | -6.56 | 8.67E-05 |
| 228082_at    | CLMP                                  | -5.52 | 5.39E-03 | -6.55 | 2.58E-03 |
|              | PCDHGA1 /// PCDHGA10 /// PCDHGA11 /// |       |          |       |          |
|              | PCDHGA12 /// PCDHGA2 /// PCDHGA3 ///  |       |          |       |          |
|              | PCDHGA4 /// PCDHGA5 /// PCDHGA6 ///   |       |          |       |          |
|              | PCDHGA7 /// PCDHGA8 /// PCDHGA9 ///   |       |          |       |          |
|              | PCDHGB1 /// PCDHGB2 /// PCDHGB3 ///   |       |          |       |          |
|              | PCDHGB4 /// PCDHGB5 /// PCDHGB6 ///   |       |          |       |          |
|              | PCDHGB7 /// PCDHGC3 /// PCDHGC4 ///   |       |          |       |          |
| 205717_x_at  | PCDHGC5                               | -4.49 | 1.46E-02 | -6.54 | 1.48E-04 |
| 213004_at    | ANGPTL2                               | -4.33 | 2.56E-02 | -6.51 | 6.71E-04 |
| 205168_at    | DDR2                                  | -6.50 | 4.96E-04 | -6.49 | 8.89E-05 |
| 202410_x_at  | IGF2 /// INS-IGF2                     | -6.63 | 1.09E-03 | -6.46 | 5.43E-03 |
| 201022_s_at  | DSTN                                  | -4.61 | 2.34E-02 | -6.46 | 4.20E-03 |
| 1559840_s_at | TBX18                                 | -5.56 | 8.29E-03 | -6.45 | 7.06E-06 |
| 200758_s_at  | NFE2L1                                | -2.96 | 2.75E-02 | -6.45 | 9.33E-04 |
| 222725_s_at  | PALMD                                 | -8.79 | 2.10E-04 | -6.44 | 5.58E-05 |
| 223044_at    | SLC40A1                               | -6.39 | 4.24E-02 | -6.42 | 2.17E-02 |
| 200025_s_at  | RPL27                                 | -3.11 | 4.70E-02 | -6.42 | 4.00E-02 |
| 45297_at     | EHD2                                  | -5.20 | 4.84E-04 | -6.41 | 8.29E-05 |
| 219549_s_at  | RTN3                                  | -4.51 | 4.96E-03 | -6.40 | 1.06E-03 |
| 220298_s_at  | SPATA6                                | -4.81 | 3.82E-03 | -6.38 | 2.14E-06 |
| 211730_s_at  | POLR2L                                | -2.47 | 5.63E-03 | -6.38 | 3.62E-04 |
| 210996_s_at  | YWHAE                                 | -3.48 | 2.52E-02 | -6.38 | 2.82E-02 |
| 212653_s_at  | EHBP1                                 | -7.82 | 1.81E-04 | -6.34 | 2.06E-05 |
| 242541_at    | ABCA9                                 | -6.35 | 1.02E-02 | -6.32 | 6.04E-04 |



|              |                                |        |          |          |          |          |
|--------------|--------------------------------|--------|----------|----------|----------|----------|
| 200637_s_at  | PTPRF                          | -7.29  | 1.51E-05 | -6.32    | 6.09E-04 |          |
| 212759_s_at  | TCF7L2                         | -4.59  | 5.49E-03 | -6.31    | 1.02E-03 |          |
| 202975_s_at  | RHOBTB3                        | -6.97  | 2.23E-03 | -6.31    | 2.49E-03 |          |
| 204115_at    | GNG11                          | -10.68 | 1.39E-03 | -6.30    | 1.61E-04 |          |
| 203394_s_at  | HES1                           | -8.80  | 1.78E-03 | -6.30    | 2.21E-03 |          |
| 206101_at    | ECM2                           | -5.50  | 2.36E-02 | -6.29    | 1.01E-04 |          |
| 201336_at    | VAMP3                          | -3.69  | 3.65E-02 | -6.29    | 5.12E-03 |          |
| 201366_at    | ANXA7                          | -5.81  | 2.36E-02 | -6.28    | 1.16E-02 |          |
| 207255_at    | LEPR                           | -7.61  | 3.12E-04 | -6.28    | 1.17E-04 |          |
| 210990_s_at  | LAMA4                          | -4.51  | 2.70E-03 | -6.26    | 8.87E-04 |          |
| 224593_at    | ZNF664                         | -7.11  | 2.88E-03 | -6.25    | 5.05E-04 |          |
| 217837_s_at  | CHMP3 /// RNF103-CHMP3         | -4.83  | 5.77E-03 | -6.25    | 4.46E-05 |          |
| 201860_s_at  | PLAT                           | -9.89  | 2.98E-03 | -6.24    | 4.43E-04 |          |
| 217963_s_at  | NGFRAP1                        | -5.97  | 1.04E-03 | -6.22    | 1.71E-04 |          |
| 212136_at    | ATP2B4                         | -4.89  | 4.23E-03 | -6.21    | 4.18E-03 |          |
| 226677_at    | ZNF521                         | -7.71  | 3.43E-02 | -6.21    | 3.52E-05 |          |
| 227466_at    | FAM200B                        | -3.11  | 4.68E-02 | -6.19    | 1.35E-03 |          |
| 218245_at    | TSKU                           | -7.85  | 1.64E-04 | -6.17    | 1.39E-04 |          |
| 221321_s_at  | KCNIP2                         | -11.94 | 8.17E-04 | -6.17    | 2.31E-04 |          |
| 200007_at    | SRP14                          | -4.20  | 4.97E-02 | -6.16    | 2.04E-02 |          |
| 226895_at    | NFIC                           | -4.34  | 2.90E-02 | -6.16    | 6.09E-03 |          |
| 224976_at    | NFIA                           | -6.80  | 4.37E-04 | -6.16    | 6.45E-04 |          |
| 203813_s_at  | SLIT3                          | -6.78  | 1.86E-04 | -6.16    | 1.44E-04 |          |
| 209616_s_at  | CES1 /// LOC100653057          | -7.84  | 8.10E-04 | -6.16    | 6.44E-03 |          |
| 1552616_a_at | ACACB                          | -5.90  | 3.22E-03 | -6.15    | 1.24E-03 |          |
| 223063_at    | C1orf198                       | -5.10  | 3.52E-04 | -6.15    | 5.30E-06 |          |
| 225274_at    | PCYOX1                         | -5.16  | 4.12E-03 | -6.11    | 1.35E-04 |          |
| 216339_s_at  | LOC101060681 /// TNXA /// TNXB | -6.26  | 8.03E-04 | -6.11    | 2.95E-03 |          |
| 226448_at    | FAM89A /// MIR1182             | -4.54  | 7.90E-04 | -6.10    | 8.74E-06 |          |
| 213151_s_at  |                                | 7-Sep  | -5.45    | 4.47E-02 | -6.08    | 2.26E-02 |
| 238151_at    | ---                            |        | -3.83    | 1.05E-03 | -6.05    | 7.81E-07 |
| 208790_s_at  | PTRF                           | -4.30  | 7.89E-04 | -6.04    | 2.35E-04 |          |
| 210825_s_at  | PEBP1                          | -3.77  | 1.58E-02 | -6.02    | 3.12E-04 |          |
| 1555889_a_at | CRTAP /// LOC100653071         | -3.44  | 2.41E-02 | -6.02    | 2.05E-02 |          |
| 213247_at    | SVEP1                          | -4.66  | 1.73E-03 | -6.01    | 1.86E-05 |          |
| 202920_at    | ANK2                           | -6.02  | 1.69E-02 | -6.01    | 1.37E-03 |          |
| 208789_at    | PTRF                           | -3.31  | 6.63E-04 | -5.98    | 2.08E-05 |          |
| 212494_at    | TENC1                          | -2.61  | 2.62E-02 | -5.98    | 7.88E-06 |          |
| 220477_s_at  | TMEM230                        | -4.75  | 2.57E-02 | -5.98    | 1.19E-02 |          |
| 213342_at    | YAP1                           | -6.07  | 5.99E-03 | -5.96    | 1.66E-03 |          |
| 202202_s_at  | LAMA4                          | -6.23  | 3.46E-03 | -5.95    | 3.91E-04 |          |
| 221478_at    | BNIP3L                         | -5.81  | 3.57E-03 | -5.94    | 1.67E-03 |          |
| 204389_at    | MAOA                           | -6.70  | 4.16E-03 | -5.93    | 2.40E-04 |          |

|              |                             |       |          |       |          |
|--------------|-----------------------------|-------|----------|-------|----------|
| 209185_s_at  | IRS2                        | -3.70 | 4.40E-02 | -5.90 | 1.61E-04 |
| 202686_s_at  | AXL                         | -4.69 | 3.05E-02 | -5.90 | 3.56E-04 |
| 212239_at    | PIK3R1                      | -3.65 | 3.78E-02 | -5.89 | 3.05E-05 |
| 212135_s_at  | ATP2B4                      | -3.86 | 5.03E-03 | -5.88 | 8.06E-03 |
| 214433_s_at  | SELENBP1                    | -7.66 | 1.60E-05 | -5.87 | 2.65E-05 |
| 225102_at    | MGLL                        | -5.62 | 1.92E-05 | -5.87 | 1.45E-04 |
| 209348_s_at  | MAF                         | -8.90 | 1.94E-02 | -5.84 | 2.19E-03 |
| 213702_x_at  | ASAH1                       | -4.60 | 4.12E-02 | -5.83 | 4.29E-02 |
| 223132_s_at  | TRIM8                       | -3.59 | 1.55E-02 | -5.82 | 5.81E-04 |
| 1560697_at   | TRHDE-AS1                   | -9.71 | 1.04E-03 | -5.81 | 1.41E-03 |
| 202371_at    | TCEAL4                      | -5.00 | 2.83E-02 | -5.81 | 9.30E-04 |
| 209135_at    | ASPH                        | -3.96 | 3.31E-02 | -5.81 | 8.87E-04 |
| 218010_x_at  | PPDPF                       | -2.41 | 2.95E-02 | -5.80 | 3.05E-03 |
| 1553961_s_at | SNX21                       | -4.09 | 6.21E-03 | -5.80 | 2.88E-05 |
| 208770_s_at  | EIF4EBP2                    | -3.51 | 7.70E-03 | -5.79 | 1.80E-03 |
| 210869_s_at  | MCAM                        | -6.23 | 1.44E-03 | -5.77 | 2.23E-03 |
| 226932_at    | SSPN                        | -4.13 | 3.00E-02 | -5.76 | 7.04E-05 |
| 212566_at    | MAP4                        | -4.81 | 2.28E-02 | -5.75 | 1.18E-03 |
| 205726_at    | DIAPH2                      | -3.93 | 2.13E-02 | -5.73 | 1.55E-04 |
| 202053_s_at  | ALDH3A2                     | -4.17 | 2.31E-02 | -5.72 | 3.68E-04 |
| 209298_s_at  | ITSN1                       | -5.42 | 2.91E-02 | -5.71 | 1.63E-03 |
| 210896_s_at  | ASPH                        | -3.78 | 2.04E-02 | -5.70 | 8.60E-04 |
| 204537_s_at  | GABRE /// MIR224 /// MIR452 | -7.42 | 4.95E-05 | -5.69 | 4.69E-04 |
| 1553102_a_at | CCDC69                      | -4.40 | 4.88E-02 | -5.68 | 2.40E-03 |
| 209309_at    | AZGP1                       | -9.95 | 2.09E-03 | -5.66 | 3.11E-03 |
| 201968_s_at  | PGM1                        | -3.97 | 3.95E-03 | -5.65 | 2.64E-05 |
| 203335_at    | PHYH                        | -5.38 | 2.28E-03 | -5.64 | 6.47E-05 |
| 210517_s_at  | AKAP12                      | -6.65 | 5.57E-03 | -5.64 | 3.59E-05 |
| 213029_at    | NFIB                        | -5.21 | 6.54E-03 | -5.64 | 9.01E-05 |
| 201387_s_at  | UCHL1                       | -4.03 | 5.59E-03 | -5.63 | 8.39E-05 |
| 227419_x_at  | PLAC9                       | -3.58 | 9.35E-03 | -5.63 | 6.21E-06 |
| 1557938_s_at | PTRF                        | -4.00 | 8.15E-03 | -5.63 | 4.71E-04 |
| 200985_s_at  | CD59                        | -4.15 | 4.07E-02 | -5.62 | 6.87E-03 |
| 223087_at    | ECHDC1                      | -6.19 | 6.03E-03 | -5.60 | 7.76E-03 |
| 214279_s_at  | NDRG2                       | -2.89 | 2.59E-02 | -5.59 | 9.95E-05 |
| 201701_s_at  | PGRMC2                      | -4.81 | 3.79E-03 | -5.55 | 1.05E-03 |
| 205341_at    | EHD2                        | -3.76 | 4.10E-03 | -5.54 | 1.03E-04 |
| 201787_at    | FBLN1                       | -4.02 | 8.01E-03 | -5.52 | 4.81E-03 |
| 204823_at    | NAV3                        | -5.53 | 1.28E-02 | -5.51 | 1.72E-06 |
| 212154_at    | SDC2                        | -3.85 | 3.62E-02 | -5.49 | 2.07E-03 |
| 213032_at    | NFIB                        | -8.79 | 9.42E-03 | -5.48 | 8.09E-04 |
| 209702_at    | FTO                         | -5.02 | 9.61E-03 | -5.47 | 3.96E-04 |
| 224581_s_at  | NUCKS1                      | -4.38 | 6.71E-03 | -5.46 | 8.91E-04 |

|              |                       |       |          |       |          |
|--------------|-----------------------|-------|----------|-------|----------|
| 227957_at    | GSN                   | -2.95 | 1.62E-02 | -5.46 | 1.26E-05 |
| 201812_s_at  | C4orf46 /// TOMM7     | -3.00 | 6.50E-03 | -5.45 | 3.36E-04 |
| 57588_at     | SLC24A3               | -4.90 | 6.10E-03 | -5.43 | 4.31E-05 |
| 210881_s_at  | IGF2 /// INS-IGF2     | -4.87 | 3.33E-03 | -5.42 | 3.45E-03 |
| 227958_s_at  | GSN                   | -4.60 | 6.10E-03 | -5.41 | 2.38E-05 |
| 228186_s_at  | RSPO3                 | -7.67 | 2.99E-03 | -5.40 | 7.84E-05 |
| 208847_s_at  | ADH5                  | -5.62 | 2.05E-04 | -5.39 | 2.08E-03 |
| 206929_s_at  | NFIC                  | -2.33 | 3.62E-02 | -5.38 | 4.96E-04 |
| 208732_at    | RAB2A                 | -3.72 | 4.06E-02 | -5.38 | 2.58E-04 |
| 224999_at    | EGFR                  | -4.27 | 1.91E-02 | -5.35 | 2.55E-04 |
| 213419_at    | APBB2                 | -4.55 | 2.80E-02 | -5.35 | 5.43E-03 |
| 201628_s_at  | RRAGA                 | -4.57 | 2.07E-02 | -5.35 | 6.80E-03 |
| 206930_at    | GLYAT                 | -4.54 | 2.37E-03 | -5.35 | 4.94E-03 |
| 221619_s_at  | MTCH1                 | -3.24 | 4.36E-02 | -5.34 | 9.00E-03 |
| 212646_at    | RFTN1                 | -3.56 | 2.88E-02 | -5.33 | 4.69E-03 |
| 202133_at    | WWTR1                 | -5.18 | 2.09E-02 | -5.32 | 2.37E-03 |
| 205253_at    | PBX1                  | -5.08 | 1.65E-03 | -5.30 | 2.82E-04 |
| 223836_at    | FGFBP2                | -4.01 | 4.47E-02 | -5.30 | 3.88E-04 |
| 222457_s_at  | LIMA1                 | -4.98 | 3.26E-02 | -5.30 | 4.34E-03 |
| 203562_at    | FEZ1                  | -3.99 | 9.26E-03 | -5.29 | 3.67E-05 |
| 203414_at    | MMD                   | -8.39 | 1.11E-03 | -5.28 | 3.29E-04 |
| 204963_at    | SSPN                  | -5.53 | 1.19E-02 | -5.28 | 1.86E-05 |
| 208660_at    | CS                    | -3.24 | 3.94E-02 | -5.27 | 3.24E-02 |
| 225352_at    | SEC62                 | -4.87 | 1.13E-02 | -5.27 | 5.69E-04 |
| 203336_s_at  | ITGB1BP1              | -3.87 | 4.34E-03 | -5.26 | 2.61E-06 |
| 39729_at     | PRDX2                 | -4.29 | 5.72E-03 | -5.24 | 1.07E-03 |
| 213895_at    | EMP1                  | -7.16 | 7.66E-03 | -5.24 | 1.59E-03 |
| 224445_s_at  | ZFYVE21               | -3.47 | 7.84E-03 | -5.23 | 1.34E-05 |
| 206955_at    | AQP7 /// LOC100509620 | -6.39 | 2.47E-03 | -5.22 | 3.02E-04 |
| 216331_at    | ITGA7                 | -3.74 | 6.21E-03 | -5.22 | 4.66E-03 |
| 202123_s_at  | ABL1                  | -3.95 | 1.48E-03 | -5.21 | 1.36E-03 |
| 209290_s_at  | NFIB                  | -5.41 | 2.29E-02 | -5.21 | 9.25E-03 |
| 229011_at    | ---                   | -5.09 | 1.08E-02 | -5.20 | 3.52E-05 |
| 203859_s_at  | PALM                  | -4.14 | 5.79E-04 | -5.19 | 7.47E-05 |
| 201412_at    | LRP10                 | -3.58 | 2.23E-02 | -5.19 | 2.24E-02 |
| 222454_s_at  | PARVA                 | -3.72 | 1.87E-02 | -5.18 | 6.40E-04 |
| 212977_at    | CXCR7                 | -6.04 | 3.71E-03 | -5.17 | 6.21E-05 |
| 201148_s_at  | TIMP3                 | -3.31 | 1.63E-02 | -5.17 | 3.19E-04 |
| 213001_at    | ANGPTL2               | -3.69 | 3.10E-02 | -5.16 | 2.06E-04 |
| 226694_at    | AKAP2 /// PALM2-AKAP2 | -5.21 | 1.24E-02 | -5.14 | 4.16E-03 |
| 212690_at    | DDHD2                 | -4.89 | 2.22E-02 | -5.14 | 3.36E-04 |
| 1570202_a_at | MKL2                  | -3.70 | 3.12E-02 | -5.14 | 3.83E-03 |
| 209106_at    | NCOA1                 | -4.19 | 1.07E-02 | -5.13 | 2.13E-03 |

|              |                          |       |          |       |          |
|--------------|--------------------------|-------|----------|-------|----------|
| 1555240_s_at | GNG12                    | -3.61 | 3.29E-02 | -5.12 | 1.31E-06 |
| 201403_s_at  | LOC100505828 /// MGST3   | -3.18 | 5.30E-03 | -5.12 | 1.41E-03 |
| 221870_at    | EHD2                     | -2.79 | 4.24E-03 | -5.11 | 1.90E-04 |
| 218901_at    | PLSCR4                   | -4.89 | 2.83E-02 | -5.11 | 4.67E-04 |
| 222860_s_at  | PDGFD                    | -5.15 | 2.01E-02 | -5.10 | 1.13E-03 |
| 209303_at    | NDUFS4                   | -3.23 | 3.98E-02 | -5.08 | 4.77E-04 |
| 201121_s_at  | PGRMC1                   | -3.19 | 3.72E-02 | -5.07 | 7.47E-05 |
| 222669_s_at  | SBDS /// SBDSP1          | -3.85 | 3.79E-02 | -5.05 | 1.11E-05 |
| 213156_at    | ---                      | -4.23 | 2.22E-02 | -5.05 | 3.13E-03 |
| 219737_s_at  | PCDH9                    | -6.42 | 7.01E-04 | -5.04 | 5.80E-05 |
| 200911_s_at  | TACC1                    | -3.08 | 4.07E-02 | -5.02 | 1.71E-03 |
| 229404_at    | TWIST2                   | -5.65 | 8.45E-04 | -5.01 | 2.11E-04 |
| 227522_at    | CMBL                     | -4.33 | 7.54E-03 | -5.01 | 2.87E-06 |
| 208796_s_at  | CCNG1                    | -4.74 | 4.70E-02 | -5.01 | 4.40E-03 |
| 226192_at    | AR                       | -3.15 | 4.75E-02 | -4.99 | 1.47E-04 |
| 209147_s_at  | PPAP2A                   | -4.22 | 2.65E-02 | -4.99 | 1.35E-04 |
| 1562234_a_at | NAV3                     | -8.56 | 7.63E-04 | -4.99 | 1.92E-05 |
| 226751_at    | CNRIP1                   | -3.59 | 1.90E-02 | -4.99 | 1.41E-04 |
| 213568_at    | OSR2                     | -6.52 | 3.68E-03 | -4.96 | 3.45E-04 |
| 205141_at    | ANG                      | -3.66 | 7.28E-03 | -4.96 | 3.84E-04 |
| 212761_at    | TCF7L2                   | -4.43 | 1.90E-02 | -4.95 | 1.22E-02 |
| 40665_at     | FMO3                     | -4.15 | 1.74E-02 | -4.94 | 7.67E-03 |
| 203812_at    | SLIT3                    | -4.96 | 9.53E-04 | -4.94 | 6.44E-05 |
| 219561_at    | COPZ2                    | -3.47 | 1.44E-02 | -4.94 | 1.43E-05 |
| 218546_at    | C1orf115                 | -3.59 | 5.11E-03 | -4.93 | 1.03E-04 |
| 200090_at    | FNTA                     | -2.99 | 4.84E-02 | -4.91 | 1.89E-03 |
| 205353_s_at  | PEBP1                    | -3.64 | 1.43E-02 | -4.91 | 8.86E-04 |
| 203131_at    | PDGFRA                   | -5.77 | 1.55E-02 | -4.90 | 5.39E-03 |
| 200844_s_at  | PRDX6                    | -6.23 | 2.83E-04 | -4.90 | 9.66E-05 |
| 202377_at    | LEPROT                   | -4.90 | 1.92E-02 | -4.89 | 3.42E-03 |
| 212987_at    | FBXO9                    | -2.70 | 4.96E-02 | -4.88 | 7.48E-03 |
| 215913_s_at  | GULP1                    | -7.49 | 1.75E-05 | -4.87 | 1.73E-04 |
| 219213_at    | JAM2                     | -3.77 | 3.65E-02 | -4.86 | 1.00E-03 |
| 206030_at    | ASPA                     | -5.53 | 5.55E-04 | -4.86 | 4.75E-04 |
| 215388_s_at  | CFH /// CFHR1            | -6.08 | 2.24E-02 | -4.84 | 1.29E-02 |
| 219054_at    | NPR3                     | -6.87 | 7.67E-04 | -4.83 | 1.18E-04 |
| 213176_s_at  | LTBP4                    | -4.09 | 1.00E-03 | -4.83 | 4.31E-05 |
| 233375_at    | EFCAB2                   | -3.71 | 1.95E-02 | -4.81 | 4.33E-04 |
| 200711_s_at  | SKP1                     | -4.33 | 2.04E-02 | -4.81 | 3.59E-05 |
| 202399_s_at  | AP3S2 /// C15orf38-AP3S2 | -3.61 | 1.81E-02 | -4.79 | 1.15E-03 |
| 218418_s_at  | KANK2                    | -4.89 | 2.20E-03 | -4.78 | 1.88E-04 |
| 211467_s_at  | NFIB                     | -3.09 | 3.29E-02 | -4.77 | 2.81E-03 |
| 208848_at    | ADH5                     | -2.92 | 3.78E-02 | -4.77 | 1.52E-07 |

|              |               |        |          |       |          |
|--------------|---------------|--------|----------|-------|----------|
| 235129_at    | PPP1R1A       | -10.34 | 5.00E-05 | -4.76 | 2.69E-05 |
| 215235_at    | SPTAN1        | -3.56  | 2.61E-02 | -4.75 | 1.11E-02 |
| 227243_s_at  | EBF3          | -5.65  | 5.30E-03 | -4.74 | 2.75E-04 |
| 1554044_a_at | MRAP          | -3.96  | 1.05E-02 | -4.72 | 6.44E-04 |
| 221983_at    | FAM134A       | -3.96  | 6.90E-03 | -4.71 | 5.20E-04 |
| 202092_s_at  | ARL2BP        | -3.51  | 4.24E-02 | -4.71 | 2.88E-02 |
| 210757_x_at  | DAB2          | -5.13  | 1.37E-02 | -4.71 | 1.90E-02 |
| 201801_s_at  | SLC29A1       | -6.01  | 1.65E-04 | -4.71 | 1.20E-03 |
| 218552_at    | ECHDC2        | -3.54  | 7.03E-03 | -4.71 | 1.62E-04 |
| 209357_at    | CITED2        | -4.61  | 1.59E-02 | -4.68 | 6.87E-03 |
| 224481_s_at  | HECTD1        | -4.64  | 2.55E-02 | -4.68 | 9.80E-03 |
| 217143_s_at  | TRDC /// TRDC | -5.39  | 6.95E-04 | -4.68 | 1.47E-04 |
| 209512_at    | HSDL2         | -4.54  | 3.02E-02 | -4.67 | 2.83E-04 |
| 200771_at    | LAMC1         | -4.51  | 4.33E-02 | -4.67 | 4.81E-03 |
| 211340_s_at  | MCAM          | -4.77  | 1.78E-03 | -4.67 | 6.22E-04 |
| 233889_at    | TBX18         | -5.70  | 3.07E-04 | -4.67 | 1.39E-04 |
| 209366_x_at  | CYB5A         | -5.84  | 1.41E-04 | -4.67 | 3.99E-04 |
| 203329_at    | PTPRM         | -2.84  | 1.88E-02 | -4.67 | 8.24E-04 |
| 215116_s_at  | DNM1          | -3.73  | 4.27E-02 | -4.67 | 1.22E-03 |
| 213488_at    | SNED1         | -4.24  | 4.78E-02 | -4.66 | 3.65E-03 |
| 203641_s_at  | COBL1         | -5.13  | 6.48E-04 | -4.66 | 5.96E-04 |
| 204039_at    | CEBPA         | -4.37  | 1.25E-02 | -4.65 | 1.60E-03 |
| 241963_at    | ZNF704        | -4.14  | 4.52E-03 | -4.64 | 2.64E-05 |
| 213285_at    | TMEM30B       | -4.44  | 2.59E-02 | -4.64 | 4.73E-05 |
| 226282_at    | PTPN14        | -3.08  | 3.61E-02 | -4.62 | 3.77E-04 |
| 203803_at    | PCYOX1        | -5.99  | 6.41E-03 | -4.62 | 7.48E-04 |
| 225914_s_at  | CAB39L        | -4.25  | 8.61E-03 | -4.62 | 3.55E-05 |
| 202995_s_at  | FBLN1         | -3.44  | 3.73E-02 | -4.61 | 2.05E-02 |
| 213357_at    | GTF2H5        | -3.81  | 3.59E-02 | -4.61 | 1.36E-03 |
| 235747_at    | LINC00849     | -4.50  | 2.30E-03 | -4.61 | 6.82E-04 |
| 231862_at    | CBX5          | -4.60  | 4.21E-02 | -4.60 | 2.96E-02 |
| 202747_s_at  | ITM2A         | -5.26  | 3.59E-02 | -4.59 | 1.17E-02 |
| 224690_at    | FAM210B       | -3.51  | 1.80E-02 | -4.59 | 4.43E-03 |
| 212793_at    | DAAM2         | -2.92  | 4.58E-02 | -4.59 | 3.10E-06 |
| 218062_x_at  | CDC42EP4      | -3.88  | 8.12E-04 | -4.58 | 3.06E-06 |
| 224821_at    | ABHD14B       | -3.64  | 6.57E-03 | -4.58 | 7.74E-04 |
| 219025_at    | CD248         | -4.34  | 3.32E-04 | -4.58 | 5.37E-04 |
| 217761_at    | ADI1          | -5.09  | 1.27E-02 | -4.58 | 2.01E-04 |
| 202187_s_at  | PPP2R5A       | -3.44  | 4.84E-03 | -4.56 | 7.92E-03 |
| 202341_s_at  | TRIM2         | -6.69  | 1.59E-03 | -4.56 | 8.84E-05 |
| 212093_s_at  | MTUS1         | -7.00  | 2.23E-03 | -4.55 | 5.00E-04 |
| 202930_s_at  | SUCLA2        | -4.50  | 3.26E-02 | -4.55 | 1.26E-03 |
| 200879_s_at  | EPAS1         | -2.96  | 1.56E-02 | -4.54 | 2.13E-02 |

|              |                                                                                                                                                                                                                                                                |       |          |       |          |
|--------------|----------------------------------------------------------------------------------------------------------------------------------------------------------------------------------------------------------------------------------------------------------------|-------|----------|-------|----------|
| 218061_at    | MEA1                                                                                                                                                                                                                                                           | -2.71 | 3.41E-02 | -4.54 | 2.09E-03 |
| 208820_at    | PTK2                                                                                                                                                                                                                                                           | -4.45 | 4.14E-02 | -4.54 | 1.50E-03 |
| 212675_s_at  | CEP68                                                                                                                                                                                                                                                          | -3.89 | 2.76E-02 | -4.53 | 9.59E-05 |
| 210010_s_at  | SLC25A1                                                                                                                                                                                                                                                        | -3.22 | 2.61E-03 | -4.53 | 1.65E-03 |
| 219090_at    | SLC24A3                                                                                                                                                                                                                                                        | -4.24 | 6.29E-03 | -4.52 | 8.88E-06 |
| 227386_s_at  | TMEM200B                                                                                                                                                                                                                                                       | -4.70 | 2.34E-03 | -4.51 | 4.99E-04 |
| 219552_at    | SVEP1                                                                                                                                                                                                                                                          | -5.06 | 3.63E-03 | -4.49 | 2.00E-04 |
| 225080_at    | MYO1C                                                                                                                                                                                                                                                          | -4.28 | 3.93E-04 | -4.49 | 6.16E-05 |
| 213737_x_at  | GOLGA8I /// GOLGA8O                                                                                                                                                                                                                                            | -3.47 | 4.27E-02 | -4.48 | 8.47E-04 |
| 209086_x_at  | MCAM                                                                                                                                                                                                                                                           | -3.70 | 3.29E-03 | -4.48 | 3.24E-03 |
| 226705_at    | FGFR1                                                                                                                                                                                                                                                          | -5.01 | 6.92E-04 | -4.47 | 5.84E-04 |
| 204454_at    | LDOC1                                                                                                                                                                                                                                                          | -3.34 | 2.37E-02 | -4.47 | 5.72E-05 |
| 218651_s_at  | LARP6                                                                                                                                                                                                                                                          | -5.14 | 1.47E-03 | -4.47 | 1.58E-05 |
| 205723_at    | CNTFR                                                                                                                                                                                                                                                          | -7.70 | 1.35E-04 | -4.43 | 1.08E-05 |
| 226113_at    | ZNF436                                                                                                                                                                                                                                                         | -4.89 | 2.02E-03 | -4.43 | 1.37E-03 |
| 201278_at    | DAB2                                                                                                                                                                                                                                                           | -5.01 | 2.07E-02 | -4.42 | 3.95E-03 |
| 204964_s_at  | SSPN                                                                                                                                                                                                                                                           | -3.82 | 1.51E-02 | -4.41 | 1.89E-06 |
| 204442_x_at  | LTBP4                                                                                                                                                                                                                                                          | -3.25 | 1.12E-02 | -4.41 | 1.92E-05 |
| 212169_at    | FKBP9                                                                                                                                                                                                                                                          | -3.31 | 2.84E-02 | -4.41 | 4.31E-03 |
| 202008_s_at  | NID1                                                                                                                                                                                                                                                           | -4.35 | 4.48E-02 | -4.40 | 2.34E-02 |
| 212096_s_at  | MTUS1                                                                                                                                                                                                                                                          | -5.91 | 3.04E-03 | -4.40 | 5.35E-04 |
| 209123_at    | QDPR                                                                                                                                                                                                                                                           | -3.58 | 3.12E-04 | -4.40 | 1.08E-04 |
| 225677_at    | BCAP29                                                                                                                                                                                                                                                         | -4.48 | 9.88E-03 | -4.40 | 7.46E-04 |
| 221496_s_at  | TOB2                                                                                                                                                                                                                                                           | -3.19 | 1.10E-02 | -4.40 | 2.59E-03 |
| 205529_s_at  | RUNX1T1                                                                                                                                                                                                                                                        | -4.01 | 4.11E-02 | -4.40 | 5.83E-04 |
| 1555754_s_at | ATN1                                                                                                                                                                                                                                                           | -1.99 | 3.79E-02 | -4.39 | 4.56E-03 |
| 239220_at    | OTTHUMG00000167229 /// RP11-736K20.5                                                                                                                                                                                                                           | -4.76 | 9.97E-04 | -4.39 | 3.98E-04 |
| 222455_s_at  | PARVA                                                                                                                                                                                                                                                          | -9.64 | 1.16E-03 | -4.38 | 1.94E-05 |
| 244741_s_at  | ZNF667-AS1                                                                                                                                                                                                                                                     | -3.77 | 3.40E-02 | -4.37 | 5.63E-06 |
| 213122_at    | TSPYL5                                                                                                                                                                                                                                                         | -5.52 | 1.41E-03 | -4.37 | 2.25E-04 |
|              | PCDHGA1 /// PCDHGA10 /// PCDHGA11 /// PCDHGA12 /// PCDHGA2 /// PCDHGA3 /// PCDHGA4 /// PCDHGA5 /// PCDHGA6 /// PCDHGA7 /// PCDHGA8 /// PCDHGA9 /// PCDHGB1 /// PCDHGB2 /// PCDHGB3 /// PCDHGB4 /// PCDHGB5 /// PCDHGB6 /// PCDHGB7 /// PCDHGC3 /// PCDHGC4 /// |       |          |       |          |
| 215836_s_at  | PCDHGC5                                                                                                                                                                                                                                                        | -2.63 | 4.17E-02 | -4.37 | 8.48E-05 |
| 202007_at    | NID1                                                                                                                                                                                                                                                           | -5.42 | 4.70E-02 | -4.37 | 4.85E-03 |
| 218007_s_at  | RPS27L                                                                                                                                                                                                                                                         | -4.55 | 1.99E-02 | -4.36 | 2.31E-02 |
| 1553644_at   | SYNE3                                                                                                                                                                                                                                                          | -3.06 | 1.38E-04 | -4.35 | 8.59E-06 |
| 201380_at    | CRTAP /// LOC100653071                                                                                                                                                                                                                                         | -3.42 | 2.32E-02 | -4.34 | 5.94E-04 |
| 242137_at    | RBMS3                                                                                                                                                                                                                                                          | -4.05 | 2.54E-02 | -4.34 | 5.44E-04 |
| 233261_at    | EBF1                                                                                                                                                                                                                                                           | -4.42 | 4.34E-02 | -4.33 | 2.27E-03 |

|              |                        |        |       |          |       |          |
|--------------|------------------------|--------|-------|----------|-------|----------|
| 214890_s_at  | FAM149A                |        | -2.97 | 1.68E-02 | -4.33 | 3.58E-05 |
| 201060_x_at  | STOM                   |        | -3.69 | 3.53E-02 | -4.33 | 2.07E-02 |
| 212701_at    | TLN2                   |        | -3.52 | 2.20E-03 | -4.32 | 2.52E-04 |
| 217047_s_at  | FAM13A                 |        | -4.96 | 1.40E-02 | -4.31 | 7.91E-05 |
| 213364_s_at  | SNX1                   |        | -4.03 | 1.91E-02 | -4.31 | 1.06E-03 |
| 205399_at    | DCLK1                  |        | -4.39 | 1.78E-02 | -4.31 | 2.65E-04 |
| 225629_s_at  | ZBTB4                  |        | -3.62 | 4.43E-02 | -4.31 | 9.45E-05 |
| 226188_at    | LGALS1                 |        | -3.58 | 1.86E-02 | -4.29 | 1.96E-04 |
| 212970_at    | APBB2                  |        | -6.15 | 5.78E-05 | -4.29 | 9.69E-05 |
| 235281_x_at  | AHNAK                  |        | -2.82 | 1.75E-02 | -4.29 | 4.31E-02 |
| 232313_at    | TMEM132C               |        | -7.85 | 8.63E-05 | -4.29 | 8.91E-05 |
| 209868_s_at  | RBMS1                  |        | -3.33 | 4.77E-02 | -4.29 | 3.99E-02 |
| 205609_at    | ANGPT1                 |        | -5.59 | 6.28E-05 | -4.27 | 2.93E-05 |
| 208626_s_at  | VAT1                   |        | -2.49 | 6.07E-03 | -4.27 | 2.24E-04 |
| 205384_at    | FXD1                   |        | -3.66 | 1.53E-03 | -4.27 | 1.02E-04 |
| 206837_at    | ALX1                   |        | -5.74 | 2.68E-02 | -4.27 | 2.65E-03 |
| 201706_s_at  | PEX19                  |        | -3.90 | 9.24E-03 | -4.27 | 7.60E-06 |
| 225185_at    | MRAS                   |        | -3.14 | 1.54E-02 | -4.26 | 2.12E-05 |
| 211986_at    | AHNAK                  |        | -2.56 | 2.69E-02 | -4.25 | 2.53E-03 |
| 207277_at    | CD209                  |        | -7.08 | 1.92E-02 | -4.24 | 1.89E-03 |
| 222209_s_at  | TMEM135                |        | -5.71 | 1.78E-03 | -4.24 | 1.44E-03 |
| 1557400_at   | ---                    |        | -4.20 | 2.37E-02 | -4.24 | 5.82E-05 |
| 201307_at    |                        | 11-Sep | -3.11 | 1.10E-02 | -4.24 | 8.40E-04 |
| 225576_at    | GINM1                  |        | -4.03 | 1.33E-02 | -4.24 | 1.26E-03 |
| 219616_at    | ACSS3                  |        | -2.76 | 4.77E-02 | -4.23 | 5.12E-04 |
| 224707_at    | CYSTM1                 |        | -3.71 | 6.06E-03 | -4.23 | 1.20E-03 |
| 227388_at    | TUSC1                  |        | -5.79 | 1.47E-03 | -4.22 | 5.85E-05 |
| 219935_at    | ADAMTS5                |        | -5.17 | 2.56E-02 | -4.21 | 4.82E-03 |
| 1553322_s_at | TEAD1                  |        | -4.07 | 2.36E-02 | -4.21 | 6.51E-05 |
| 201009_s_at  | LOC101060503 /// TXNIP |        | -2.54 | 4.99E-02 | -4.20 | 4.70E-02 |
| 209212_s_at  | KLF5                   |        | -3.82 | 2.45E-02 | -4.19 | 3.75E-04 |
| 200862_at    | DHCR24                 |        | -2.73 | 2.95E-02 | -4.19 | 2.75E-03 |
| 202564_x_at  | ARL2                   |        | -2.64 | 5.66E-03 | -4.18 | 4.81E-05 |
| 204997_at    | GPD1                   |        | -8.07 | 2.67E-04 | -4.18 | 7.77E-03 |
| 218450_at    | HEBP1                  |        | -3.08 | 4.81E-02 | -4.18 | 4.94E-03 |
| 200671_s_at  | SPTBN1                 |        | -3.11 | 3.63E-03 | -4.17 | 3.49E-04 |
| 219091_s_at  | MMRN2                  |        | -3.52 | 2.45E-02 | -4.16 | 3.98E-03 |
| 211607_x_at  | EGFR                   |        | -3.86 | 4.81E-03 | -4.15 | 2.88E-04 |
| 200923_at    | LGALS3BP               |        | -3.13 | 1.84E-02 | -4.15 | 2.96E-02 |
| 209834_at    | CHST3                  |        | -3.66 | 2.00E-02 | -4.14 | 4.46E-03 |
| 204418_x_at  | GSTM2                  |        | -2.62 | 2.17E-02 | -4.14 | 3.88E-04 |
| 218259_at    | MKL2                   |        | -4.94 | 1.19E-02 | -4.14 | 5.86E-04 |
| 203758_at    | CTSO                   |        | -5.06 | 4.13E-02 | -4.14 | 2.79E-02 |

|             |                                   |        |       |          |       |          |
|-------------|-----------------------------------|--------|-------|----------|-------|----------|
| 203282_at   | GBE1                              |        | -4.11 | 3.57E-02 | -4.13 | 7.93E-04 |
| 1557820_at  | AFG3L2                            |        | -4.65 | 4.86E-02 | -4.13 | 1.36E-02 |
| 228027_at   | ARMCX5-GPRASP2 /// GPRASP2        |        | -3.90 | 4.66E-02 | -4.12 | 3.02E-04 |
| 224894_at   | YAP1                              |        | -4.11 | 1.14E-02 | -4.11 | 3.35E-05 |
| 203245_s_at | LINC00094                         |        | -3.17 | 7.18E-03 | -4.11 | 2.46E-05 |
| 225949_at   | NRBP2                             |        | -3.30 | 2.63E-02 | -4.10 | 5.11E-04 |
| 207843_x_at | CYB5A                             |        | -4.70 | 2.03E-04 | -4.10 | 1.10E-03 |
| 200681_at   | GLO1                              |        | -2.77 | 4.00E-02 | -4.09 | 1.44E-03 |
| 1556056_at  | SIK2                              |        | -4.04 | 9.41E-05 | -4.09 | 4.09E-05 |
| 223131_s_at | TRIM8                             |        | -3.26 | 8.56E-03 | -4.09 | 1.35E-03 |
| 201124_at   | ITGB5                             |        | -6.23 | 6.43E-03 | -4.09 | 1.20E-03 |
| 215016_x_at | DST                               |        | -4.53 | 1.46E-02 | -4.09 | 3.21E-03 |
| 226813_at   | NTPCR                             |        | -4.63 | 6.03E-03 | -4.09 | 1.40E-03 |
| 202378_s_at | LEPROT                            |        | -4.20 | 1.38E-02 | -4.07 | 9.04E-03 |
| 212647_at   | RRAS                              |        | -3.51 | 6.06E-04 | -4.06 | 6.19E-05 |
| 229127_at   | JAM2                              |        | -3.47 | 3.04E-02 | -4.06 | 2.34E-04 |
| 213236_at   | SASH1                             |        | -2.95 | 1.04E-02 | -4.06 | 6.00E-04 |
| 212224_at   | ALDH1A1                           |        | -5.21 | 1.77E-03 | -4.06 | 1.14E-03 |
| 207937_x_at | FGFR1                             |        | -2.90 | 1.56E-02 | -4.05 | 8.10E-04 |
| 218865_at   |                                   | 1-Mar  | -5.66 | 1.00E-03 | -4.05 | 3.74E-03 |
| 205200_at   | CLEC3B /// EXOSC7                 |        | -3.08 | 2.85E-02 | -4.05 | 3.28E-03 |
| 201778_s_at | EFCAB14                           |        | -2.93 | 4.38E-02 | -4.03 | 1.31E-03 |
| 212056_at   | GSE1                              |        | -4.08 | 2.46E-02 | -4.03 | 2.58E-02 |
| 219790_s_at | NPR3                              |        | -6.71 | 3.12E-03 | -4.03 | 2.08E-03 |
| 201117_s_at | CPE                               |        | -4.52 | 6.87E-03 | -4.02 | 9.96E-05 |
| 213033_s_at | NFIB                              |        | -2.84 | 2.96E-02 | -4.02 | 1.47E-03 |
| 224337_s_at | FZD4                              |        | -7.06 | 7.71E-05 | -4.01 | 2.74E-03 |
| 237517_at   | ---                               |        | -4.25 | 4.84E-02 | -4.00 | 1.44E-02 |
| 223000_s_at | F11R                              |        | -4.73 | 1.92E-03 | -4.00 | 6.99E-03 |
| 209220_at   | GPC3                              |        | -3.39 | 2.48E-02 | -4.00 | 5.23E-04 |
| 231846_at   | FOXRED2                           |        | -3.73 | 2.26E-02 | -4.00 | 3.27E-04 |
| 228693_at   | CCDC50                            |        | -4.39 | 3.72E-02 | -4.00 | 1.73E-03 |
| 224755_at   | TM9SF3                            |        | -5.37 | 1.15E-02 | -3.99 | 5.20E-03 |
| 208591_s_at | PDE3B                             |        | -5.34 | 2.13E-02 | -3.99 | 2.77E-03 |
|             | LOC100996732 /// LOC100996735 /// |        |       |          |       |          |
|             | LOC101060590 /// LOC645166 ///    |        |       |          |       |          |
| 228158_at   | LOC654342                         |        | -5.26 | 2.19E-03 | -3.98 | 8.70E-04 |
| 208944_at   | TGFBR2                            |        | -4.01 | 2.11E-02 | -3.97 | 1.98E-03 |
| 230071_at   |                                   | 11-Sep | -4.73 | 1.19E-02 | -3.97 | 2.00E-04 |
| 210823_s_at | PTPRS                             |        | -2.75 | 3.33E-03 | -3.97 | 8.22E-05 |
| 200636_s_at | PTPRF                             |        | -5.07 | 1.17E-05 | -3.97 | 2.57E-05 |
| 218101_s_at | NDUFC2 /// NDUFC2-KCTD14          |        | -4.03 | 9.52E-03 | -3.96 | 3.66E-03 |
| 212062_at   | ATP9A                             |        | -7.01 | 5.86E-06 | -3.95 | 1.63E-04 |



|             |                                    |       |          |       |          |
|-------------|------------------------------------|-------|----------|-------|----------|
| 204754_at   | HLF                                | -3.32 | 3.25E-02 | -3.95 | 1.45E-05 |
| 236291_at   | RDH5                               | -3.96 | 6.19E-03 | -3.94 | 2.02E-03 |
| 202136_at   | ZMYND11                            | -4.20 | 1.29E-02 | -3.94 | 1.73E-03 |
| 218494_s_at | SLC2A4RG                           | -3.75 | 1.81E-03 | -3.93 | 3.55E-05 |
| 225698_at   | EPB41L4A-AS1                       | -2.74 | 4.20E-02 | -3.93 | 5.31E-06 |
| 231452_at   | HRASLS5                            | -4.05 | 2.12E-02 | -3.92 | 1.89E-03 |
| 212240_s_at | PIK3R1                             | -5.59 | 2.58E-03 | -3.92 | 1.76E-04 |
| 202457_s_at | PPP3CA                             | -5.85 | 1.60E-02 | -3.91 | 1.40E-02 |
| 212985_at   | APBB2                              | -4.14 | 3.02E-02 | -3.91 | 8.10E-05 |
| 209600_s_at | ACOX1                              | -4.13 | 9.93E-03 | -3.90 | 2.67E-03 |
| 212558_at   | SPRY1                              | -3.32 | 4.03E-02 | -3.90 | 1.59E-02 |
| 226522_at   | PODN                               | -3.62 | 2.56E-03 | -3.89 | 2.83E-04 |
| 202994_s_at | FBLN1                              | -4.01 | 3.54E-02 | -3.89 | 8.97E-03 |
| 239370_at   | LOC100505633                       | -3.82 | 1.19E-02 | -3.89 | 1.20E-03 |
| 226165_at   | C8orf59                            | -4.69 | 3.12E-02 | -3.89 | 4.04E-02 |
| 213058_at   | TTC28                              | -3.77 | 2.52E-02 | -3.89 | 3.63E-04 |
| 218487_at   | ALAD                               | -4.70 | 2.11E-03 | -3.88 | 4.61E-05 |
| 212875_s_at | C2CD2                              | -2.97 | 7.50E-03 | -3.88 | 2.55E-04 |
| 224543_at   | SVEP1                              | -4.42 | 1.96E-05 | -3.87 | 8.09E-04 |
| 202912_at   | ADM                                | -5.54 | 8.46E-04 | -3.87 | 6.04E-03 |
| 212233_at   | MAP1B                              | -5.52 | 3.54E-02 | -3.87 | 1.31E-03 |
| 211717_at   | ANKRD40                            | -3.16 | 6.69E-03 | -3.87 | 2.24E-03 |
| 210984_x_at | EGFR                               | -4.75 | 1.49E-04 | -3.87 | 3.97E-04 |
| 209663_s_at | ITGA7                              | -4.88 | 1.07E-02 | -3.87 | 1.91E-02 |
| 214063_s_at | TF                                 | -4.77 | 2.69E-03 | -3.87 | 3.80E-02 |
| 227917_at   | LOC100506990                       | -4.25 | 1.02E-02 | -3.86 | 1.53E-02 |
| 226084_at   | MAP1B                              | -4.63 | 3.50E-02 | -3.86 | 4.70E-03 |
| 211423_s_at | SC5D                               | -3.12 | 2.06E-02 | -3.86 | 7.23E-04 |
| 227923_at   | SHANK3                             | -4.47 | 4.77E-03 | -3.86 | 6.86E-03 |
| 213352_at   | TMCC1                              | -3.15 | 2.82E-02 | -3.85 | 5.65E-04 |
| 228256_s_at | EPB41L4A                           | -3.91 | 2.57E-03 | -3.84 | 2.42E-04 |
|             | PCDHA1 /// PCDHA10 /// PCDHA11 /// |       |          |       |          |
|             | PCDHA12 /// PCDHA13 /// PCDHA2 /// |       |          |       |          |
|             | PCDHA3 /// PCDHA4 /// PCDHA5 ///   |       |          |       |          |
|             | PCDHA6 /// PCDHA7 /// PCDHA8 ///   |       |          |       |          |
| 223435_s_at | PCDHA9 /// PCDHAC1 /// PCDHAC2     | -3.41 | 1.89E-02 | -3.84 | 3.30E-07 |
| 65718_at    | GPR124                             | -4.47 | 3.35E-02 | -3.83 | 4.27E-04 |
| 202566_s_at | SVIL                               | -3.42 | 4.47E-02 | -3.82 | 3.95E-03 |
| 235382_at   | AQPEP                              | -4.74 | 1.40E-02 | -3.82 | 5.57E-03 |
| 226820_at   | ZNF362                             | -3.32 | 4.33E-02 | -3.82 | 1.93E-03 |
| 213830_at   | YME1L1                             | -3.66 | 6.46E-03 | -3.82 | 2.88E-05 |
| 228950_s_at | WLS                                | -4.45 | 2.29E-03 | -3.82 | 1.67E-04 |
| 207191_s_at | ISLR                               | -3.11 | 3.27E-02 | -3.82 | 1.42E-03 |
| 243880_at   | GOSR2                              | -4.52 | 1.48E-02 | -3.82 | 3.87E-03 |

|              |                                |       |          |       |          |
|--------------|--------------------------------|-------|----------|-------|----------|
| 209908_s_at  | TGFB2                          | -6.03 | 2.68E-03 | -3.81 | 1.43E-04 |
| 224689_at    | MANBAL                         | -3.07 | 6.41E-03 | -3.81 | 1.38E-05 |
| 214665_s_at  | CHP1                           | -3.17 | 2.88E-03 | -3.80 | 3.10E-03 |
| 213865_at    | DCBLD2                         | -3.48 | 3.16E-02 | -3.80 | 2.54E-03 |
| 47560_at     | LPHN1                          | -3.70 | 9.96E-04 | -3.80 | 2.06E-04 |
| 205817_at    | SIX1                           | -2.88 | 5.67E-03 | -3.79 | 5.22E-05 |
| 214066_x_at  | NPR2                           | -3.19 | 8.21E-03 | -3.78 | 3.08E-04 |
| 223449_at    | SEMA6A                         | -3.24 | 3.74E-02 | -3.77 | 2.10E-04 |
| 211941_s_at  | PEBP1                          | -2.23 | 4.26E-02 | -3.77 | 3.14E-03 |
| 228411_at    | PARD3B                         | -3.27 | 2.95E-02 | -3.74 | 6.33E-05 |
| 235371_at    | GXYLT2                         | -7.02 | 3.25E-03 | -3.74 | 1.63E-02 |
| 205752_s_at  | GSTM5                          | -4.28 | 2.30E-02 | -3.74 | 3.18E-04 |
| 1563621_at   | ---                            | -2.92 | 2.93E-02 | -3.72 | 7.50E-03 |
| 229512_at    | FAM120C                        | -4.49 | 8.60E-04 | -3.72 | 2.96E-05 |
| 218467_at    | PSMG2                          | -4.46 | 1.12E-02 | -3.72 | 2.81E-02 |
| 213005_s_at  | KANK1                          | -3.10 | 3.93E-02 | -3.72 | 1.65E-03 |
| 210168_at    | C6                             | -6.54 | 2.43E-02 | -3.71 | 1.82E-02 |
| 208666_s_at  | ST13                           | -3.71 | 7.66E-03 | -3.71 | 1.02E-02 |
| 218284_at    | SMAD3                          | -3.55 | 2.77E-03 | -3.69 | 7.89E-05 |
| 226095_s_at  | ATXN1L                         | -2.44 | 4.72E-02 | -3.69 | 4.76E-04 |
| 208158_s_at  | OSBPL1A                        | -3.46 | 2.52E-02 | -3.69 | 1.61E-04 |
| 224871_at    | TPRG1L                         | -4.56 | 2.19E-04 | -3.68 | 5.00E-06 |
| 40093_at     | BCAM                           | -3.14 | 1.89E-02 | -3.68 | 2.32E-03 |
| 210832_x_at  | PTGER3                         | -4.53 | 4.61E-03 | -3.68 | 5.76E-03 |
| 225900_at    | EXOC6B                         | -5.49 | 2.50E-04 | -3.67 | 1.89E-04 |
| 40148_at     | APBB2                          | -4.65 | 7.07E-03 | -3.66 | 5.07E-03 |
| 218417_s_at  | SLC48A1                        | -2.98 | 2.01E-02 | -3.65 | 9.95E-05 |
| 221589_s_at  | ALDH6A1                        | -4.12 | 5.81E-03 | -3.65 | 5.66E-04 |
| 226676_at    | ZNF521                         | -4.42 | 1.53E-02 | -3.64 | 1.62E-04 |
| 213451_x_at  | LOC101060681 /// TNXA /// TNXB | -4.48 | 6.65E-03 | -3.64 | 1.44E-03 |
| 225941_at    | EIF4E3                         | -3.74 | 1.04E-02 | -3.63 | 1.28E-03 |
| 1558941_at   | ZNF704                         | -5.47 | 2.01E-04 | -3.63 | 5.78E-04 |
| 217802_s_at  | NUCKS1                         | -3.89 | 2.07E-02 | -3.63 | 2.98E-02 |
| 235368_at    | ADAMTS5                        | -4.52 | 3.95E-02 | -3.62 | 5.69E-04 |
| 235538_at    | ---                            | -4.22 | 2.19E-02 | -3.62 | 4.02E-03 |
| 232235_at    | DSEL                           | -4.24 | 3.27E-03 | -3.62 | 1.59E-05 |
| 222834_s_at  | GNG12                          | -3.08 | 4.30E-02 | -3.62 | 1.64E-04 |
| 210089_s_at  | LAMA4                          | -2.67 | 1.14E-02 | -3.61 | 4.77E-04 |
| 38918_at     | SOX13                          | -4.92 | 8.33E-03 | -3.61 | 7.25E-04 |
| 1554701_a_at | TBC1D16                        | -3.94 | 2.12E-03 | -3.61 | 8.81E-05 |
| 204237_at    | GULP1                          | -3.05 | 3.22E-02 | -3.61 | 2.02E-04 |
| 214749_s_at  | ARMCX6                         | -4.72 | 3.49E-02 | -3.60 | 2.95E-02 |
| 1553194_at   | NEGR1                          | -6.99 | 7.42E-03 | -3.60 | 9.98E-04 |

|              |          |       |          |       |          |
|--------------|----------|-------|----------|-------|----------|
| 228772_at    | HNMT     | -3.88 | 8.37E-03 | -3.60 | 1.78E-04 |
| 209485_s_at  | OSBPL1A  | -3.86 | 8.07E-03 | -3.59 | 1.02E-04 |
| 208788_at    | ELOVL5   | -3.94 | 3.07E-02 | -3.59 | 3.20E-02 |
| 201658_at    | ARL1     | -4.33 | 1.79E-02 | -3.58 | 3.06E-03 |
| 224903_at    | CIRH1A   | -3.91 | 1.95E-02 | -3.58 | 2.25E-03 |
| 223983_s_at  | C19orf12 | -2.91 | 3.39E-02 | -3.58 | 6.84E-03 |
| 201830_s_at  | NET1     | -4.75 | 4.44E-02 | -3.57 | 8.56E-03 |
| 224812_at    | HIBADH   | -3.74 | 2.53E-02 | -3.56 | 4.04E-04 |
| 242323_at    | PLA2G12A | -4.27 | 5.38E-03 | -3.56 | 5.11E-04 |
| 201612_at    | ALDH9A1  | -3.83 | 3.86E-02 | -3.56 | 3.01E-02 |
| 212120_at    | RHOQ     | -3.66 | 1.36E-02 | -3.55 | 2.34E-02 |
| 1562139_a_at | FOXP2    | -4.27 | 9.75E-03 | -3.55 | 2.63E-03 |
| 242181_at    | ---      | -2.34 | 3.38E-02 | -3.55 | 6.83E-05 |
| 209909_s_at  | TGFB2    | -3.98 | 1.84E-02 | -3.55 | 1.86E-04 |
| 225778_at    | RBMS2    | -3.29 | 4.13E-02 | -3.54 | 4.22E-04 |
| 46270_at     | UBAP1    | -3.68 | 2.49E-02 | -3.53 | 6.83E-03 |
| 226723_at    | CCDC23   | -4.04 | 7.42E-03 | -3.52 | 1.04E-03 |
| 1555729_a_at | CD209    | -3.23 | 3.82E-02 | -3.52 | 9.06E-03 |
| 212851_at    | DCUN1D4  | -2.98 | 4.77E-02 | -3.52 | 8.80E-03 |
| 208970_s_at  | UROD     | -3.99 | 1.40E-02 | -3.52 | 1.73E-03 |
| 200649_at    | NUCB1    | -2.47 | 3.30E-02 | -3.52 | 3.93E-02 |
| 208186_s_at  | LIPE     | -2.64 | 4.55E-02 | -3.52 | 2.34E-02 |
| 203631_s_at  | GPRC5B   | -2.89 | 4.81E-02 | -3.51 | 2.83E-04 |
| 201397_at    | PHGDH    | -4.78 | 7.70E-05 | -3.51 | 5.07E-04 |
| 217813_s_at  | SPIN1    | -4.15 | 1.46E-02 | -3.51 | 1.47E-02 |
| 242133_s_at  | ---      | -4.81 | 2.10E-02 | -3.50 | 1.87E-04 |
| 226683_at    | SNX18    | -3.93 | 8.45E-03 | -3.50 | 2.47E-02 |
| 1569640_s_at | EEPD1    | -4.22 | 8.15E-04 | -3.50 | 1.67E-03 |
| 228006_at    | PTEN     | -3.86 | 3.71E-02 | -3.50 | 8.33E-04 |
| 226388_at    | TCEA3    | -2.99 | 7.96E-03 | -3.50 | 1.27E-05 |
| 226571_s_at  | PTPRS    | -4.54 | 4.68E-04 | -3.49 | 1.68E-04 |
| 32259_at     | EZH1     | -3.72 | 1.97E-04 | -3.49 | 3.29E-04 |
| 202134_s_at  | WWTR1    | -3.33 | 2.06E-02 | -3.49 | 3.11E-03 |
| 202554_s_at  | GSTM3    | -5.00 | 2.34E-03 | -3.49 | 9.74E-04 |
| 239185_at    | ABCA9    | -5.86 | 1.77E-03 | -3.49 | 2.13E-03 |
| 212513_s_at  | USP33    | -3.86 | 1.34E-02 | -3.49 | 1.46E-03 |
| 237867_s_at  | PID1     | -3.59 | 3.56E-03 | -3.49 | 5.51E-05 |
| 206355_at    | GNAL     | -3.76 | 2.69E-02 | -3.48 | 2.05E-03 |
| 223005_s_at  | TMEM245  | -3.63 | 2.61E-02 | -3.48 | 5.21E-03 |
| 216081_at    | LAMA4    | -4.05 | 3.77E-02 | -3.47 | 8.07E-04 |
| 202634_at    | POLR2K   | -2.20 | 4.58E-02 | -3.47 | 5.93E-04 |
| 223193_x_at  | FAM162A  | -3.27 | 2.30E-02 | -3.47 | 1.08E-02 |
| 202807_s_at  | TOM1     | -4.64 | 1.19E-03 | -3.46 | 2.24E-03 |

|             |                                |       |          |          |          |          |
|-------------|--------------------------------|-------|----------|----------|----------|----------|
| 213455_at   | FAM114A1                       | -2.94 | 2.28E-02 | -3.46    | 9.45E-05 |          |
| 220511_s_at | DLC1                           | -3.74 | 2.23E-03 | -3.45    | 2.65E-03 |          |
| 204111_at   | HNMT                           | -2.75 | 5.27E-03 | -3.44    | 7.16E-05 |          |
| 214721_x_at | CDC42EP4                       | -4.35 | 6.24E-04 | -3.44    | 4.14E-05 |          |
| 218718_at   | PDGFC                          | -3.86 | 4.60E-02 | -3.44    | 9.28E-03 |          |
| 216352_x_at | PCDHGA3                        | -3.39 | 5.66E-03 | -3.43    | 4.76E-04 |          |
| 244111_at   | KRT222                         | -3.57 | 3.15E-02 | -3.43    | 1.16E-04 |          |
| 226731_at   | ITGA1                          | -3.55 | 1.46E-02 | -3.43    | 6.90E-04 |          |
| 223519_at   | ZAK                            | -4.61 | 4.85E-02 | -3.43    | 1.62E-02 |          |
| 218773_s_at | MSRB2                          | -2.91 | 1.72E-02 | -3.43    | 1.29E-04 |          |
| 223467_at   | RASD1                          | -3.45 | 4.16E-02 | -3.43    | 4.40E-03 |          |
| 242338_at   | TMEM64                         | -2.76 | 3.19E-02 | -3.42    | 1.38E-03 |          |
| 215059_at   | ---                            | -3.42 | 3.26E-03 | -3.42    | 1.22E-04 |          |
| 1558101_at  | NFIA                           | -3.01 | 1.12E-02 | -3.42    | 3.23E-04 |          |
| 206726_at   | HPGDS                          | -2.52 | 4.71E-02 | -3.41    | 1.28E-04 |          |
| 212249_at   | PIK3R1                         | -4.26 | 2.92E-03 | -3.40    | 2.09E-04 |          |
| 229106_at   | DYNLL2                         | -2.59 | 4.11E-02 | -3.39    | 1.40E-03 |          |
| 203426_s_at | IGFBP5                         | -3.35 | 6.30E-03 | -3.39    | 1.10E-03 |          |
| 222573_s_at | SAV1                           | -3.87 | 2.32E-05 | -3.38    | 1.28E-05 |          |
| 208510_s_at | PPARG                          | -4.92 | 5.71E-03 | -3.38    | 1.52E-03 |          |
| 203337_x_at | ITGB1BP1                       | -4.08 | 1.49E-02 | -3.37    | 9.04E-03 |          |
| 213198_at   | ACVR1B                         | -3.72 | 1.54E-02 | -3.37    | 1.96E-02 |          |
| 209614_at   | ADH1B                          | -3.66 | 2.34E-02 | -3.37    | 2.29E-04 |          |
| 231993_at   | ITGBL1                         | -3.49 | 4.99E-02 | -3.37    | 1.18E-03 |          |
| 228716_at   | THRB                           | -4.04 | 4.50E-03 | -3.37    | 1.85E-04 |          |
| 1553960_at  | SNX21                          | -3.37 | 5.00E-03 | -3.36    | 2.18E-04 |          |
| 210249_s_at | NCOA1                          | -2.63 | 4.17E-02 | -3.36    | 7.66E-03 |          |
| 224645_at   | EIF4EBP2                       | -3.38 | 1.55E-03 | -3.36    | 3.21E-06 |          |
| 220952_s_at | PLEKHA5                        | -5.75 | 1.39E-02 | -3.35    | 3.68E-04 |          |
| 226148_at   | ZBTB44                         | -3.95 | 3.39E-02 | -3.35    | 9.54E-03 |          |
| 224131_at   | HCAR1                          | -4.57 | 5.75E-05 | -3.34    | 3.23E-04 |          |
| 225977_at   | PCDH18                         | -4.16 | 1.02E-03 | -3.34    | 1.99E-05 |          |
| 213486_at   | COPG2IT1                       | -3.82 | 1.02E-02 | -3.34    | 8.14E-03 |          |
| 202245_at   | LSS                            | -2.56 | 4.44E-03 | -3.33    | 4.18E-03 |          |
| 210762_s_at | DLC1                           | -3.82 | 1.29E-02 | -3.33    | 3.12E-03 |          |
| 216333_x_at | LOC101060681 /// TNXA /// TNXB | -4.61 | 4.38E-03 | -3.33    | 1.09E-03 |          |
| 225924_at   | FNIP2                          | -2.92 | 4.82E-02 | -3.33    | 9.05E-03 |          |
| 214496_x_at | KAT6B                          | -3.18 | 1.49E-02 | -3.32    | 1.25E-04 |          |
| 214383_x_at | KLHDC3                         | -2.44 | 4.05E-03 | -3.32    | 1.56E-04 |          |
| 204400_at   | EFS                            | -4.94 | 6.78E-03 | -3.31    | 3.02E-05 |          |
| 221636_s_at |                                | 2-Mar | -3.70    | 3.79E-02 | -3.30    | 7.80E-03 |
| 41644_at    | SASH1                          | -3.68 | 1.48E-02 | -3.30    | 1.06E-02 |          |
| 218025_s_at | ECI2                           | -4.02 | 7.34E-03 | -3.29    | 1.81E-03 |          |

|              |                        |       |          |       |          |
|--------------|------------------------|-------|----------|-------|----------|
| 202863_at    | SP100                  | -3.78 | 2.85E-02 | -3.29 | 1.07E-02 |
| 201035_s_at  | HADH                   | -5.06 | 4.29E-04 | -3.28 | 1.36E-03 |
| 215870_s_at  | PLA2G5                 | -4.06 | 2.11E-02 | -3.28 | 4.80E-03 |
| 238003_at    | HEPACAM /// HEPN1      | -2.53 | 7.46E-03 | -3.28 | 1.72E-04 |
| 221928_at    | ACACB                  | -3.76 | 2.23E-03 | -3.28 | 5.34E-03 |
| 212441_at    | KIAA0232               | -2.17 | 4.69E-02 | -3.27 | 6.62E-06 |
| 218966_at    | MYO5C                  | -3.23 | 4.54E-02 | -3.27 | 1.89E-03 |
| 213675_at    | PARVA                  | -3.69 | 3.53E-04 | -3.27 | 6.89E-06 |
| 228839_s_at  | LOC642361              | -3.71 | 1.22E-02 | -3.26 | 1.31E-03 |
| 1552476_s_at | PLCD3                  | -4.23 | 8.51E-03 | -3.25 | 4.45E-04 |
| 225613_at    | MAST4                  | -4.55 | 5.46E-03 | -3.25 | 5.69E-04 |
| 222783_s_at  | SMOC1                  | -4.30 | 4.01E-03 | -3.25 | 4.79E-04 |
| 202562_s_at  | C14orf1                | -2.19 | 2.18E-02 | -3.24 | 6.66E-04 |
| 225915_at    | CAB39L                 | -3.68 | 1.81E-02 | -3.24 | 8.39E-04 |
| 205499_at    | SRPX2                  | -4.05 | 7.48E-03 | -3.23 | 2.83E-03 |
| 205608_s_at  | ANGPT1                 | -7.21 | 1.46E-03 | -3.23 | 1.07E-03 |
| 218440_at    | MCCC1                  | -4.15 | 1.18E-02 | -3.23 | 2.71E-03 |
| 211874_s_at  | KAT6B                  | -3.32 | 4.35E-02 | -3.22 | 4.31E-04 |
| 48106_at     | SLC48A1                | -2.48 | 5.42E-03 | -3.22 | 2.59E-04 |
| 213724_s_at  | PDK2                   | -3.34 | 6.33E-04 | -3.22 | 2.07E-05 |
| 207542_s_at  | AQP1                   | -2.95 | 2.44E-02 | -3.21 | 2.54E-02 |
| 201346_at    | ADIPOR2                | -3.51 | 8.03E-04 | -3.20 | 2.01E-04 |
| 221958_s_at  | WLS                    | -4.09 | 1.16E-02 | -3.20 | 2.19E-04 |
| 212294_at    | GNG12                  | -3.28 | 2.99E-03 | -3.20 | 1.23E-03 |
| 235631_at    | DDR2                   | -3.86 | 3.83E-03 | -3.20 | 6.09E-05 |
| 207808_s_at  | PROS1                  | -4.95 | 2.63E-02 | -3.19 | 4.78E-04 |
| 205079_s_at  | MPDZ                   | -3.53 | 4.00E-03 | -3.19 | 7.13E-04 |
| 1564876_s_at | FOXP2                  | -3.86 | 3.27E-03 | -3.19 | 5.08E-03 |
| 213617_s_at  | TPGS2                  | -2.60 | 2.11E-02 | -3.18 | 1.16E-02 |
| 209550_at    | NDN                    | -4.33 | 3.24E-04 | -3.18 | 5.34E-04 |
| 234233_s_at  | ---                    | -3.38 | 2.98E-02 | -3.17 | 4.14E-03 |
| 208647_at    | FDFT1                  | -2.95 | 1.74E-02 | -3.17 | 1.07E-03 |
| 235076_at    | CALCOCO2               | -3.94 | 1.42E-02 | -3.14 | 5.29E-05 |
| 39854_r_at   | PNPLA2                 | -2.89 | 5.39E-04 | -3.14 | 5.39E-03 |
| 205011_at    | VWA5A                  | -3.02 | 3.63E-02 | -3.13 | 8.87E-04 |
| 222437_s_at  | CHMP3 /// RNF103-CHMP3 | -3.67 | 2.07E-02 | -3.13 | 6.26E-03 |
| 217504_at    | ABCA6                  | -4.74 | 1.31E-02 | -3.13 | 2.37E-02 |
| 235201_at    | FOXP2                  | -4.02 | 8.03E-03 | -3.13 | 4.96E-03 |
| 223213_s_at  | ZHX1                   | -3.85 | 1.41E-02 | -3.12 | 3.83E-04 |
| 211569_s_at  | HADH                   | -3.45 | 3.19E-02 | -3.12 | 1.58E-03 |
| 225611_at    | MAST4                  | -3.43 | 4.40E-03 | -3.12 | 1.27E-03 |
| 200693_at    | YWHAQ                  | -3.58 | 1.15E-02 | -3.11 | 4.45E-03 |
| 201276_at    | RAB5B                  | -3.49 | 6.79E-05 | -3.11 | 1.75E-04 |

|              |                                         |       |          |       |          |
|--------------|-----------------------------------------|-------|----------|-------|----------|
| 210740_s_at  | ITPK1                                   | -2.34 | 1.25E-02 | -3.11 | 9.82E-03 |
| 209386_at    | TM4SF1                                  | -4.08 | 2.48E-02 | -3.11 | 1.34E-02 |
| 205315_s_at  | SNTB2                                   | -3.93 | 7.74E-04 | -3.11 | 6.01E-04 |
| 206093_x_at  | LOC101060681 /// TNXA /// TNXB          | -4.41 | 9.05E-03 | -3.11 | 3.87E-03 |
| 238066_at    | RBP7                                    | -3.80 | 1.23E-02 | -3.11 | 2.30E-02 |
| 212730_at    | SYNM                                    | -4.49 | 2.47E-02 | -3.10 | 3.51E-02 |
| 211954_s_at  | IPO5                                    | -2.32 | 2.47E-02 | -3.10 | 1.05E-04 |
| 207071_s_at  | ACO1                                    | -6.67 | 8.22E-05 | -3.10 | 2.12E-02 |
| 209087_x_at  | MCAM                                    | -4.07 | 3.47E-03 | -3.09 | 1.85E-02 |
| 217891_at    | C16orf58                                | -2.86 | 2.29E-02 | -3.08 | 4.30E-02 |
| 220326_s_at  | ARHGEF40                                | -2.49 | 3.73E-03 | -3.06 | 2.12E-04 |
| 202685_s_at  | AXL                                     | -2.23 | 4.96E-02 | -3.06 | 8.12E-04 |
| 217780_at    | WDR83OS                                 | -2.34 | 4.83E-02 | -3.06 | 1.02E-03 |
| 212451_at    | SECISBP2L                               | -4.10 | 3.63E-02 | -3.06 | 2.76E-02 |
| 218631_at    | AVPI1                                   | -5.14 | 9.08E-04 | -3.05 | 1.88E-03 |
| 221618_s_at  | TAF9B                                   | -3.38 | 3.07E-02 | -3.05 | 2.17E-04 |
| 209373_at    | MALL                                    | -2.97 | 4.34E-03 | -3.05 | 3.09E-03 |
| 226770_at    | MAGI3                                   | -3.97 | 1.54E-02 | -3.04 | 7.40E-04 |
| 228456_s_at  | CDS2                                    | -2.35 | 4.64E-02 | -3.04 | 2.94E-03 |
| 203638_s_at  | FGFR2                                   | -3.08 | 6.82E-03 | -3.03 | 1.22E-03 |
| 216511_s_at  | TCF7L2                                  | -4.36 | 1.30E-02 | -3.03 | 3.94E-03 |
| 218224_at    | PNMA1                                   | -4.01 | 1.87E-03 | -3.02 | 3.96E-04 |
| 1557116_at   | APOL6                                   | -3.81 | 1.02E-02 | -3.02 | 1.07E-04 |
| 224582_s_at  | NUCKS1                                  | -2.43 | 3.95E-02 | -3.01 | 1.77E-03 |
| 228807_at    | ASPA                                    | -3.96 | 3.67E-03 | -3.01 | 6.56E-03 |
| 219814_at    | MBNL3                                   | -2.67 | 2.91E-02 | -3.01 | 1.74E-04 |
| 226844_at    | MOB3B                                   | -3.12 | 4.26E-02 | -3.01 | 6.12E-03 |
| 209830_s_at  | SLC9A3R2                                | -2.59 | 4.05E-02 | -3.01 | 8.22E-04 |
| 218253_s_at  | EIF2D                                   | -3.02 | 2.75E-02 | -3.01 | 6.27E-03 |
| 208030_s_at  | ADD1                                    | -3.94 | 2.80E-03 | -3.00 | 1.00E-02 |
| 227121_at    | ---                                     | -2.80 | 4.57E-02 | -3.00 | 1.48E-03 |
| 231015_at    | KLF15                                   | -2.46 | 2.02E-02 | -3.00 | 1.50E-03 |
| 202967_at    | GSTA4                                   | -3.81 | 2.54E-04 | -2.99 | 4.35E-05 |
| 201575_at    | SNW1                                    | -2.50 | 2.47E-02 | -2.99 | 4.98E-03 |
| 212553_at    | RPRD2                                   | -3.98 | 4.55E-03 | -2.98 | 4.55E-03 |
| 202646_s_at  | CSDE1                                   | -2.36 | 2.44E-02 | -2.98 | 1.25E-03 |
| 203787_at    | SSBP2                                   | -4.31 | 1.71E-02 | -2.98 | 5.43E-03 |
| 205158_at    | RNASE4                                  | -3.34 | 2.08E-03 | -2.98 | 1.98E-03 |
| 204793_at    | GPRASP1                                 | -3.86 | 3.39E-02 | -2.98 | 7.62E-03 |
| 1557241_a_at | OTTHUMG00000175567 /// RP11-524D16__A.3 | -4.18 | 3.20E-03 | -2.97 | 8.24E-04 |
| 204290_s_at  | ALDH6A1                                 | -3.43 | 1.52E-02 | -2.97 | 1.54E-03 |
| 202443_x_at  | NOTCH2                                  | -2.95 | 2.84E-02 | -2.97 | 2.21E-02 |

|              |                        |       |          |       |          |
|--------------|------------------------|-------|----------|-------|----------|
| 219077_s_at  | WVOX                   | -2.45 | 3.51E-02 | -2.97 | 1.27E-03 |
| 236262_at    | MMRN2                  | -4.13 | 3.04E-02 | -2.97 | 3.26E-03 |
| 224744_at    | IMPAD1                 | -2.57 | 2.82E-02 | -2.96 | 5.16E-04 |
| 212253_x_at  | DST                    | -2.48 | 2.70E-02 | -2.96 | 5.04E-03 |
| 225276_at    | GSPT1                  | -2.82 | 2.52E-02 | -2.95 | 3.10E-03 |
| 229946_at    | FAM168B                | -2.43 | 3.03E-02 | -2.95 | 1.11E-02 |
| 202561_at    | TNKS                   | -2.99 | 1.08E-02 | -2.95 | 4.98E-04 |
| 242935_at    | SBF2                   | -2.64 | 4.26E-02 | -2.95 | 1.05E-04 |
| 212640_at    | PTPLB                  | -3.04 | 8.68E-03 | -2.94 | 9.55E-03 |
| 219902_at    | BHMT2                  | -3.49 | 1.44E-02 | -2.94 | 5.33E-03 |
| 216268_s_at  | JAG1                   | -3.64 | 2.98E-02 | -2.94 | 4.66E-03 |
| 226342_at    | SPTBN1                 | -4.57 | 8.47E-04 | -2.94 | 1.47E-03 |
| 212104_s_at  | RBFOX2                 | -2.27 | 4.52E-02 | -2.93 | 1.66E-03 |
| 204239_s_at  | NNAT                   | -3.12 | 2.77E-03 | -2.93 | 1.17E-03 |
| 226484_at    | ZBTB47                 | -2.90 | 4.32E-02 | -2.93 | 4.64E-06 |
| 34697_at     | LRP6                   | -3.31 | 1.89E-02 | -2.93 | 1.05E-03 |
| 218667_at    | PJA1                   | -3.24 | 8.39E-04 | -2.93 | 4.44E-04 |
| 32811_at     | MYO1C                  | -2.27 | 7.21E-04 | -2.93 | 1.18E-03 |
| 230174_at    | LYPLAL1                | -2.73 | 2.12E-02 | -2.92 | 8.38E-04 |
| 221452_s_at  | TMEM14B                | -3.15 | 4.05E-02 | -2.92 | 2.52E-03 |
| 231762_at    | FGF10                  | -4.58 | 1.22E-03 | -2.92 | 2.16E-04 |
| 225908_at    | IAH1                   | -2.83 | 3.94E-02 | -2.91 | 1.34E-03 |
| 1554485_s_at | TMEM37                 | -4.31 | 1.01E-02 | -2.90 | 2.79E-03 |
| 48031_r_at   | FAXDC2                 | -3.99 | 1.27E-03 | -2.90 | 6.78E-04 |
| 226190_at    | MAP3K13                | -3.19 | 3.56E-02 | -2.90 | 1.11E-02 |
| 202630_at    | APPBP2                 | -4.27 | 2.66E-02 | -2.89 | 1.60E-02 |
| 222436_s_at  | CHMP3 /// RNF103-CHMP3 | -2.88 | 6.82E-03 | -2.89 | 6.76E-03 |
| 209109_s_at  | TSPAN6                 | -3.03 | 1.39E-02 | -2.89 | 1.33E-02 |
| 219576_at    | MAP7D3                 | -3.51 | 1.09E-03 | -2.88 | 3.41E-04 |
| 227326_at    | MXRA7                  | -2.66 | 3.02E-02 | -2.88 | 6.25E-05 |
| 228291_s_at  | PLK1S1                 | -2.99 | 2.09E-02 | -2.88 | 1.10E-03 |
| 225426_at    | PPP6C                  | -3.51 | 5.96E-03 | -2.88 | 5.21E-04 |
| 211076_x_at  | ATN1                   | -1.80 | 2.11E-02 | -2.87 | 4.69E-02 |
| 210554_s_at  | CTBP2                  | -3.22 | 4.27E-02 | -2.87 | 9.90E-03 |
| 224415_s_at  | HINT2                  | -2.98 | 1.55E-03 | -2.87 | 4.47E-05 |
| 208335_s_at  | DARC                   | -2.96 | 8.80E-03 | -2.87 | 2.00E-03 |
| 202544_at    | GMFB                   | -3.22 | 4.33E-02 | -2.86 | 1.48E-02 |
| 200939_s_at  | RERE                   | -2.55 | 3.65E-02 | -2.86 | 7.78E-04 |
| 202003_s_at  | ACAA2                  | -3.31 | 8.93E-03 | -2.85 | 4.11E-03 |
| 202908_at    | WFS1                   | -2.30 | 1.65E-02 | -2.85 | 3.18E-04 |
| 223075_s_at  | AIF1L                  | -3.71 | 4.24E-03 | -2.85 | 2.69E-03 |
| 227962_at    | ACOX1                  | -3.00 | 1.34E-02 | -2.84 | 1.74E-04 |
| 227792_at    | ITPRIPL2               | -3.27 | 4.05E-02 | -2.84 | 2.31E-02 |

|              |                                                                                          |       |          |       |          |
|--------------|------------------------------------------------------------------------------------------|-------|----------|-------|----------|
| 223126_s_at  | C1orf21                                                                                  | -3.00 | 1.92E-02 | -2.84 | 6.67E-05 |
| 1562102_at   | ---                                                                                      | -3.78 | 1.37E-02 | -2.84 | 1.66E-02 |
| 225860_at    | MMP24-AS1                                                                                | -2.35 | 1.00E-02 | -2.83 | 3.71E-04 |
| 214889_at    | FAM149A                                                                                  | -2.72 | 7.18E-03 | -2.83 | 3.37E-04 |
| 228182_at    | ADCY5                                                                                    | -2.80 | 3.69E-02 | -2.83 | 6.49E-03 |
| 238353_at    | RASL11A                                                                                  | -2.66 | 2.77E-02 | -2.83 | 5.79E-03 |
| 228824_s_at  | PTGR1                                                                                    | -2.87 | 4.74E-02 | -2.82 | 2.90E-03 |
| 206178_at    | PLA2G5                                                                                   | -3.57 | 2.40E-03 | -2.82 | 2.20E-03 |
| 227997_at    | IL17RD                                                                                   | -3.91 | 2.19E-02 | -2.82 | 2.18E-03 |
| 211042_x_at  | MCAM                                                                                     | -2.58 | 1.03E-02 | -2.81 | 2.55E-03 |
| 200940_s_at  | RERE                                                                                     | -5.51 | 4.23E-03 | -2.81 | 1.16E-02 |
| 226989_at    | RGMB                                                                                     | -2.75 | 1.34E-02 | -2.81 | 3.52E-06 |
| 235471_at    | VSTM4                                                                                    | -3.55 | 2.70E-02 | -2.81 | 3.85E-03 |
| 224564_s_at  | RTN3                                                                                     | -2.25 | 3.74E-02 | -2.80 | 1.02E-02 |
| 201580_s_at  | TMX4                                                                                     | -2.69 | 4.87E-02 | -2.80 | 2.97E-02 |
| 229948_at    | ---                                                                                      | -3.11 | 1.48E-03 | -2.80 | 9.21E-05 |
| 203054_s_at  | TCTA                                                                                     | -2.44 | 2.96E-02 | -2.80 | 4.43E-03 |
| 206363_at    | MAF                                                                                      | -4.37 | 1.69E-02 | -2.80 | 1.65E-02 |
| 1554758_a_at | CD99L2                                                                                   | -2.72 | 1.01E-02 | -2.80 | 5.04E-03 |
| 228770_at    | GPR146                                                                                   | -3.39 | 6.07E-04 | -2.80 | 4.54E-04 |
| 1558420_at   | C14orf180                                                                                | -4.08 | 4.29E-04 | -2.79 | 5.67E-03 |
| 232501_at    | ---                                                                                      | -2.18 | 4.35E-02 | -2.79 | 2.33E-04 |
| 215963_x_at  | RPL3                                                                                     | -1.98 | 3.27E-02 | -2.79 | 4.05E-02 |
| 201707_at    | PEX19                                                                                    | -4.05 | 1.30E-05 | -2.79 | 1.25E-04 |
| 223468_s_at  | RGMA                                                                                     | -2.89 | 2.53E-02 | -2.79 | 1.02E-03 |
| 1565358_at   | RARA                                                                                     | -2.95 | 1.42E-02 | -2.78 | 7.15E-03 |
| 1555881_s_at | LZTS2                                                                                    | -2.53 | 6.29E-03 | -2.78 | 5.35E-04 |
| 241866_at    | SLC16A7                                                                                  | -3.88 | 2.76E-03 | -2.78 | 5.03E-04 |
| 226657_at    | C17orf103                                                                                | -2.01 | 4.98E-02 | -2.77 | 4.57E-04 |
| 211876_x_at  | PCDHGA10 /// PCDHGA11 /// PCDHGA12<br>/// PCDHGA3 /// PCDHGA5 /// PCDHGA6<br>/// PCDHGC3 | -2.67 | 1.12E-02 | -2.77 | 3.60E-03 |
| 207069_s_at  | SMAD6                                                                                    | -3.88 | 2.14E-02 | -2.77 | 1.94E-04 |
| 226216_at    | INSR                                                                                     | -3.76 | 2.67E-02 | -2.76 | 9.40E-03 |
| 242736_at    | ---                                                                                      | -4.96 | 1.55E-03 | -2.76 | 2.09E-02 |
| 203222_s_at  | TLE1                                                                                     | -3.42 | 2.38E-02 | -2.75 | 4.95E-03 |
| 205125_at    | PLCD1                                                                                    | -1.87 | 1.91E-02 | -2.75 | 6.33E-07 |
| 206132_at    | MCC                                                                                      | -2.97 | 2.67E-02 | -2.75 | 5.16E-03 |
| 233849_s_at  | ARHGAP5                                                                                  | -2.90 | 3.70E-02 | -2.74 | 7.99E-04 |
| 213010_at    | PRKCDBP                                                                                  | -3.25 | 2.63E-02 | -2.74 | 1.10E-03 |
| 215537_x_at  | DDAH2                                                                                    | -2.55 | 1.12E-03 | -2.73 | 1.31E-04 |
| 202623_at    | EAPP                                                                                     | -3.77 | 2.22E-02 | -2.73 | 1.78E-03 |
| 202762_at    | ROCK2                                                                                    | -2.99 | 4.47E-02 | -2.73 | 1.69E-02 |



|             |                       |       |          |       |          |
|-------------|-----------------------|-------|----------|-------|----------|
| 225494_at   | DYNLL2                | -2.49 | 3.28E-02 | -2.73 | 1.57E-02 |
| 223136_at   | AIG1                  | -4.03 | 9.06E-03 | -2.71 | 8.75E-04 |
| 203249_at   | EZH1                  | -2.81 | 3.83E-03 | -2.70 | 7.30E-03 |
| 228151_at   | ARL15                 | -3.94 | 2.41E-02 | -2.70 | 1.86E-02 |
| 217849_s_at | CDC42BPB              | -2.30 | 4.60E-02 | -2.70 | 3.77E-02 |
| 204134_at   | PDE2A                 | -3.01 | 2.31E-02 | -2.70 | 1.31E-02 |
| 1320_at     | PTPN21                | -2.82 | 6.43E-03 | -2.70 | 6.81E-05 |
| 208615_s_at | PTP4A2                | -3.59 | 2.57E-02 | -2.70 | 3.59E-02 |
| 226845_s_at | MYEOV2                | -4.72 | 2.05E-03 | -2.69 | 1.04E-02 |
| 218032_at   | SNN                   | -2.33 | 1.12E-02 | -2.69 | 3.87E-05 |
| 212590_at   | RRAS2                 | -2.86 | 3.83E-02 | -2.69 | 1.00E-02 |
| 226408_at   | TEAD2                 | -3.02 | 3.40E-02 | -2.69 | 5.65E-03 |
| 222911_s_at | CXorf36               | -3.46 | 2.17E-02 | -2.69 | 2.02E-02 |
| 32099_at    | SAFB2                 | -2.30 | 4.21E-02 | -2.67 | 2.71E-03 |
| 225863_s_at | C19orf12              | -3.05 | 1.03E-02 | -2.67 | 1.56E-02 |
| 210106_at   | BLOC1S1-RDH5 /// RDH5 | -3.04 | 8.68E-03 | -2.66 | 3.88E-03 |
| 219374_s_at | ALG9                  | -2.82 | 3.60E-02 | -2.66 | 3.51E-02 |
| 221295_at   | CIDEA                 | -6.62 | 3.02E-03 | -2.65 | 7.19E-03 |
| 228594_at   | NADK2                 | -2.85 | 3.56E-02 | -2.65 | 1.15E-03 |
| 202734_at   | TRIP10                | -2.78 | 1.35E-02 | -2.65 | 8.41E-05 |
| 221430_s_at | RNF146                | -2.37 | 4.11E-02 | -2.65 | 4.27E-03 |
| 217830_s_at | NSFL1C                | -2.14 | 4.40E-02 | -2.65 | 1.51E-04 |
| 223886_s_at | RNF146                | -3.36 | 2.74E-02 | -2.65 | 2.57E-02 |
| 224813_at   | WASL                  | -2.98 | 2.87E-02 | -2.65 | 1.35E-02 |
| 201810_s_at | SH3BP5                | -3.64 | 1.75E-02 | -2.64 | 9.11E-03 |
| 212186_at   | ACACA                 | -2.16 | 4.60E-02 | -2.64 | 6.22E-03 |
| 212504_at   | DIP2C                 | -2.79 | 1.74E-03 | -2.64 | 2.07E-03 |
| 209468_at   | LRP5                  | -2.33 | 4.07E-02 | -2.64 | 1.41E-04 |
| 218354_at   | TRAPPC2L              | -2.47 | 2.31E-02 | -2.64 | 1.20E-03 |
| 218561_s_at | LYRM4                 | -2.39 | 3.93E-02 | -2.64 | 8.18E-04 |
| 219929_s_at | ZFYVE21               | -3.29 | 1.02E-02 | -2.63 | 3.36E-04 |
| 214608_s_at | EYA1                  | -3.15 | 1.46E-02 | -2.63 | 1.43E-02 |
| 225203_at   | PPP1R16A              | -2.53 | 4.64E-03 | -2.63 | 4.29E-03 |
| 216215_s_at | RBFOX2                | -2.67 | 1.64E-03 | -2.63 | 1.67E-05 |
| 201056_at   | GOLGB1                | -2.44 | 2.84E-02 | -2.63 | 4.50E-03 |
| 201802_at   | SLC29A1               | -2.16 | 5.71E-03 | -2.63 | 2.64E-04 |
| 205528_s_at | RUNX1T1               | -3.53 | 1.76E-02 | -2.63 | 4.96E-03 |
| 205756_s_at | F8                    | -3.74 | 4.63E-02 | -2.63 | 1.91E-03 |
| 205139_s_at | UST                   | -3.72 | 2.92E-02 | -2.63 | 6.70E-04 |
| 213543_at   | SGCD                  | -2.95 | 4.73E-02 | -2.63 | 1.98E-03 |
| 216840_s_at | LAMA2                 | -3.24 | 3.55E-02 | -2.62 | 8.82E-03 |
| 214259_s_at | AKR7A2                | -2.65 | 5.79E-03 | -2.62 | 8.70E-04 |
| 235344_at   | PPM1A                 | -4.43 | 4.96E-03 | -2.62 | 2.55E-03 |

|              |                        |       |          |       |          |
|--------------|------------------------|-------|----------|-------|----------|
| 1558421_a_at | C14orf180              | -3.16 | 1.42E-02 | -2.62 | 4.11E-03 |
| 207044_at    | THRB                   | -2.75 | 8.54E-03 | -2.62 | 3.69E-05 |
| 241381_at    | CXorf36                | -4.38 | 2.12E-03 | -2.61 | 5.43E-03 |
| 226028_at    | ROBO4                  | -4.00 | 1.29E-03 | -2.61 | 1.51E-02 |
| 205503_at    | PTPN14                 | -2.52 | 2.95E-02 | -2.61 | 4.29E-03 |
| 210544_s_at  | ALDH3A2                | -3.70 | 1.42E-03 | -2.61 | 6.30E-04 |
| 1553572_a_at | CYGB                   | -2.79 | 4.92E-03 | -2.61 | 2.33E-03 |
| 218739_at    | ABHD5                  | -2.88 | 1.49E-02 | -2.61 | 1.16E-02 |
| 222422_s_at  | NDFIP1                 | -3.30 | 7.21E-03 | -2.60 | 6.03E-03 |
| 213071_at    | DPT                    | -2.39 | 3.27E-02 | -2.60 | 6.00E-03 |
| 208562_s_at  | ABCC9                  | -3.47 | 2.75E-02 | -2.60 | 4.68E-03 |
| 223283_s_at  | TSHZ1                  | -3.29 | 2.52E-02 | -2.60 | 1.41E-03 |
| 212796_s_at  | TBC1D2B                | -2.44 | 1.40E-02 | -2.60 | 2.96E-02 |
| 235110_at    | PLA2G16                | -3.27 | 1.49E-03 | -2.60 | 3.44E-03 |
| 227195_at    | ZNF503                 | -3.69 | 3.83E-03 | -2.58 | 8.90E-04 |
| 219599_at    | EIF4B                  | -3.48 | 1.91E-02 | -2.58 | 4.59E-02 |
| 218356_at    | FTSJ2                  | -3.05 | 3.91E-02 | -2.58 | 9.93E-03 |
| 213518_at    | PRKCI                  | -2.52 | 3.74E-02 | -2.58 | 8.52E-03 |
| 201865_x_at  | NR3C1                  | -2.73 | 1.22E-02 | -2.57 | 7.51E-03 |
| 229024_at    | ---                    | -4.45 | 1.80E-04 | -2.57 | 3.09E-02 |
| 220102_at    | FOXL2                  | -4.63 | 1.55E-03 | -2.57 | 4.04E-03 |
| 201223_s_at  | RAD23B                 | -3.21 | 1.84E-02 | -2.57 | 3.26E-02 |
| 228088_at    | SESTD1                 | -3.02 | 1.59E-02 | -2.56 | 1.46E-04 |
| 223279_s_at  | UACA                   | -2.97 | 3.65E-02 | -2.56 | 8.05E-03 |
| 235836_at    | MXRA7                  | -2.54 | 1.44E-02 | -2.56 | 6.13E-04 |
| 232837_at    | KIF13A                 | -2.38 | 1.86E-02 | -2.56 | 8.45E-04 |
| 202262_x_at  | DDAH2                  | -2.51 | 1.76E-03 | -2.55 | 6.67E-05 |
| 225729_at    | C6orf89                | -3.14 | 5.03E-04 | -2.55 | 2.39E-03 |
| 229764_at    | LOC101060141 /// TPRG1 | -3.38 | 2.97E-02 | -2.55 | 1.94E-03 |
| 211955_at    | IPO5                   | -2.71 | 3.31E-02 | -2.54 | 4.73E-03 |
| 212343_at    | YIPF6                  | -3.39 | 1.10E-02 | -2.54 | 1.65E-04 |
| 221543_s_at  | ERLIN2                 | -2.76 | 2.14E-02 | -2.54 | 2.53E-04 |
| 203910_at    | ARHGAP29               | -4.21 | 4.75E-02 | -2.54 | 4.97E-03 |
| 235335_at    | ABCA9                  | -2.84 | 3.70E-02 | -2.54 | 2.95E-03 |
| 202811_at    | STAMBP                 | -3.63 | 2.87E-04 | -2.54 | 4.89E-04 |
| 227190_at    | TMEM37                 | -3.30 | 3.14E-02 | -2.54 | 1.79E-02 |
| 216080_s_at  | FADS3                  | -2.24 | 2.67E-02 | -2.52 | 9.20E-03 |
| 218471_s_at  | BBS1                   | -2.99 | 2.66E-02 | -2.52 | 6.69E-03 |
| 243358_at    | IGF1R                  | -4.59 | 5.10E-03 | -2.52 | 5.43E-03 |
| 224879_at    | C9orf123               | -2.78 | 2.14E-02 | -2.51 | 4.50E-03 |
| 225974_at    | TMEM64                 | -2.56 | 3.85E-02 | -2.51 | 1.74E-04 |
| 214909_s_at  | DDAH2                  | -2.25 | 7.99E-03 | -2.51 | 3.74E-04 |
| 212101_at    | KPNA6                  | -2.63 | 3.37E-02 | -2.51 | 4.15E-02 |

|              |                                   |       |          |       |          |
|--------------|-----------------------------------|-------|----------|-------|----------|
| 1553679_s_at | VKORC1L1                          | -3.03 | 2.98E-02 | -2.51 | 1.46E-02 |
| 222456_s_at  | LIMA1                             | -3.71 | 5.88E-03 | -2.51 | 2.62E-03 |
| 225928_at    | VTI1B                             | -2.77 | 9.76E-03 | -2.51 | 2.50E-03 |
| 221274_s_at  | LMAN2L                            | -2.82 | 4.03E-03 | -2.51 | 2.04E-02 |
| 207537_at    | PFKFB1                            | -3.75 | 2.71E-03 | -2.51 | 1.93E-02 |
| 229984_at    | DTWD1                             | -4.63 | 8.84E-04 | -2.50 | 3.72E-02 |
| 202631_s_at  | APPBP2                            | -3.57 | 9.71E-03 | -2.50 | 1.42E-03 |
| 217973_at    | DCXR                              | -2.19 | 4.56E-02 | -2.50 | 5.99E-03 |
| 226638_at    | ARHGAP23                          | -3.43 | 4.17E-03 | -2.49 | 6.97E-03 |
| 212052_s_at  | TBC1D9B                           | -2.43 | 2.61E-02 | -2.49 | 5.87E-03 |
|              | PAR-SN /// SNORD107 /// SNRPN /// |       |          |       |          |
| 201522_x_at  | SNURF                             | -2.45 | 4.40E-02 | -2.49 | 3.23E-02 |
| 222760_at    | ZNF703                            | -2.02 | 3.09E-02 | -2.49 | 3.86E-04 |
| 242414_at    | QPRT                              | -2.56 | 2.38E-02 | -2.49 | 1.11E-03 |
| 228384_s_at  | PYROXD2                           | -2.66 | 4.41E-03 | -2.48 | 7.32E-04 |
| 226992_at    | NOSTRIN                           | -3.09 | 2.51E-03 | -2.48 | 1.02E-02 |
| 201092_at    | RBBP7                             | -2.67 | 3.19E-02 | -2.47 | 2.60E-05 |
| 227536_at    | ZC3H13                            | -2.40 | 2.67E-02 | -2.46 | 1.40E-03 |
| 205545_x_at  | DNAJC8                            | -2.77 | 2.16E-02 | -2.46 | 2.27E-03 |
| 213298_at    | NFIC                              | -2.53 | 4.67E-03 | -2.46 | 1.02E-04 |
| 212423_at    | ZCCHC24                           | -3.28 | 4.38E-04 | -2.45 | 5.90E-03 |
| 206263_at    | FMO4                              | -2.41 | 2.55E-02 | -2.45 | 1.03E-02 |
| 202019_s_at  | LANCL1                            | -2.76 | 1.06E-02 | -2.44 | 9.81E-03 |
| 203733_at    | DEXI                              | -2.41 | 2.97E-02 | -2.44 | 6.10E-05 |
| 225133_at    | KLF3                              | -4.03 | 1.85E-02 | -2.44 | 1.81E-03 |
| 201328_at    | ETS2                              | -2.83 | 2.02E-02 | -2.44 | 3.34E-03 |
| 209409_at    | GRB10                             | -2.39 | 3.38E-02 | -2.44 | 2.69E-03 |
| 226506_at    | THSD4                             | -2.55 | 2.75E-02 | -2.44 | 1.26E-02 |
| 205606_at    | LRP6                              | -3.07 | 1.11E-02 | -2.43 | 2.22E-03 |
| 217874_at    | SUCLG1                            | -2.38 | 4.19E-02 | -2.43 | 1.99E-02 |
| 215918_s_at  | SPTBN1                            | -3.84 | 2.02E-02 | -2.43 | 8.08E-03 |
| 212771_at    | FAM171A1                          | -4.26 | 1.87E-03 | -2.42 | 7.09E-03 |
| 214239_x_at  | PCGF2                             | -3.27 | 1.40E-02 | -2.42 | 5.38E-04 |
| 212609_s_at  | AKT3                              | -2.48 | 3.77E-02 | -2.42 | 3.18E-04 |
| 222995_s_at  | RHBDD2                            | -2.52 | 7.74E-03 | -2.42 | 2.44E-03 |
| 225772_s_at  | COX14                             | -2.67 | 1.26E-03 | -2.41 | 4.20E-03 |
| 209002_s_at  | CALCOCO1                          | -2.76 | 3.42E-03 | -2.41 | 3.24E-03 |
| 201567_s_at  | GOLGA4                            | -2.35 | 4.74E-02 | -2.41 | 4.29E-03 |
| 207836_s_at  | RBPMS                             | -3.13 | 6.66E-03 | -2.41 | 7.66E-03 |
| 203768_s_at  | STS                               | -2.98 | 1.84E-03 | -2.41 | 1.25E-03 |
| 203588_s_at  | TFDP2                             | -3.38 | 1.22E-03 | -2.40 | 1.04E-03 |
| 206068_s_at  | ACADL                             | -2.81 | 6.43E-03 | -2.40 | 1.40E-02 |
| 222418_s_at  | TMEM43                            | -2.86 | 2.11E-02 | -2.40 | 2.63E-02 |

|             |          |       |          |       |          |
|-------------|----------|-------|----------|-------|----------|
| 223430_at   | SIK2     | -3.69 | 1.57E-03 | -2.39 | 7.72E-04 |
| 231050_at   | HRASLS5  | -3.72 | 2.09E-02 | -2.39 | 2.10E-02 |
| 238062_at   | GPIHBP1  | -3.84 | 2.51E-03 | -2.39 | 3.75E-02 |
| 203220_s_at | TLE1     | -3.56 | 2.84E-03 | -2.39 | 6.90E-04 |
| 209576_at   | GNAI1    | -3.53 | 3.24E-02 | -2.39 | 4.22E-02 |
| 205824_at   | HSPB2    | -3.38 | 3.22E-03 | -2.38 | 3.80E-03 |
| 229394_s_at | ARHGAP35 | -2.78 | 4.84E-02 | -2.38 | 7.73E-03 |
| 203767_s_at | STS      | -2.48 | 4.18E-02 | -2.38 | 1.50E-03 |
| 234936_s_at | CC2D2A   | -2.83 | 2.01E-02 | -2.38 | 1.48E-03 |
| 40489_at    | ATN1     | -2.18 | 1.68E-02 | -2.38 | 5.01E-03 |
| 226485_at   | VSIG10   | -3.67 | 1.04E-02 | -2.38 | 1.07E-02 |
| 202936_s_at | SOX9     | -3.37 | 2.89E-03 | -2.38 | 7.95E-04 |
| 32625_at    | NPR1     | -3.08 | 6.31E-03 | -2.37 | 6.14E-03 |
| 224280_s_at | MTFR1L   | -3.00 | 3.00E-02 | -2.37 | 1.86E-04 |
| 211535_s_at | FGFR1    | -2.68 | 1.44E-02 | -2.37 | 1.77E-03 |
| 201897_s_at | CKS1B    | -3.06 | 1.10E-03 | -2.37 | 3.15E-03 |
| 218149_s_at | ZNF395   | -4.23 | 4.37E-03 | -2.37 | 2.57E-03 |
| 218909_at   | RPS6KC1  | -3.85 | 3.30E-02 | -2.36 | 4.80E-02 |
| 215088_s_at | SDHC     | -2.47 | 2.44E-02 | -2.36 | 1.46E-02 |
| 218124_at   | RETSAT   | -4.55 | 7.10E-04 | -2.36 | 1.08E-02 |
| 232977_x_at | MYH14    | -2.95 | 7.51E-03 | -2.36 | 3.64E-03 |
| 223170_at   | TMEM98   | -2.42 | 2.44E-02 | -2.36 | 1.38E-02 |
| 1563560_at  | AHNAK    | -2.03 | 2.30E-02 | -2.35 | 9.41E-04 |
| 206856_at   | LILRB5   | -5.40 | 3.23E-03 | -2.35 | 2.29E-03 |
| 222269_at   | APOOL    | -3.05 | 3.33E-02 | -2.35 | 1.66E-03 |
| 208336_s_at | TECR     | -2.09 | 3.09E-02 | -2.35 | 1.26E-03 |
| 225354_s_at | SH3BGRL2 | -2.88 | 1.44E-02 | -2.35 | 3.42E-03 |
| 214843_s_at | USP33    | -2.70 | 1.03E-02 | -2.34 | 1.55E-02 |
| 208316_s_at | OCRL     | -3.26 | 6.86E-03 | -2.34 | 7.52E-04 |
| 212798_s_at | ANKMY2   | -2.66 | 4.42E-02 | -2.34 | 1.47E-02 |
| 217726_at   | COPZ1    | -3.04 | 6.19E-03 | -2.33 | 1.32E-02 |
| 200635_s_at | PTPRF    | -2.90 | 6.32E-03 | -2.33 | 3.09E-03 |
| 212705_x_at | PNPLA2   | -2.80 | 2.20E-03 | -2.33 | 6.87E-03 |
| 210006_at   | ABHD14A  | -2.30 | 1.29E-02 | -2.33 | 1.48E-04 |
| 218204_s_at | FYCO1    | -3.21 | 9.27E-03 | -2.32 | 1.82E-04 |
| 205383_s_at | ZBTB20   | -2.60 | 2.31E-02 | -2.32 | 4.99E-04 |
| 237217_at   | ADAMTSL1 | -3.15 | 1.17E-02 | -2.32 | 2.01E-02 |
| 224653_at   | EIF4EBP2 | -2.75 | 4.13E-03 | -2.32 | 5.44E-03 |
| 223007_s_at | TMEM245  | -2.58 | 3.65E-02 | -2.32 | 1.75E-02 |
| 204980_at   | CLOCK    | -2.82 | 1.33E-02 | -2.32 | 2.21E-02 |
| 218910_at   | ANO10    | -2.01 | 4.44E-02 | -2.32 | 5.12E-03 |
| 213181_s_at | MOCS1    | -2.86 | 9.19E-03 | -2.31 | 2.51E-03 |
| 222998_at   | MAF1     | -2.05 | 3.20E-02 | -2.31 | 1.36E-02 |

|              |                 |       |          |       |          |
|--------------|-----------------|-------|----------|-------|----------|
| 228568_at    | GCOM1 /// MYZAP | -2.18 | 2.39E-02 | -2.31 | 8.58E-03 |
| 242888_at    | PRRT3-AS1       | -3.63 | 2.01E-03 | -2.31 | 2.55E-03 |
| 230972_at    | ANKRD9          | -3.35 | 1.24E-02 | -2.30 | 1.83E-03 |
| 240112_at    | ---             | -4.68 | 1.36E-02 | -2.30 | 3.41E-02 |
| 237326_at    | LINC00310       | -3.61 | 1.38E-03 | -2.30 | 1.14E-02 |
| 214564_s_at  | PCDHGC3         | -2.39 | 1.60E-02 | -2.29 | 5.58E-03 |
| 205379_at    | CBR3            | -2.14 | 4.64E-02 | -2.29 | 3.40E-04 |
| 221599_at    | AAMDC           | -2.57 | 1.39E-02 | -2.29 | 2.62E-03 |
| 214585_s_at  | VPS52           | -2.43 | 2.91E-02 | -2.28 | 4.92E-02 |
| 221142_s_at  | PECR            | -2.85 | 3.04E-03 | -2.28 | 5.11E-03 |
| 209099_x_at  | JAG1            | -2.74 | 4.57E-02 | -2.28 | 1.41E-03 |
| 239273_s_at  | MMP28           | -2.98 | 2.07E-02 | -2.28 | 1.44E-02 |
| 227657_at    | RNF150          | -2.53 | 2.07E-02 | -2.28 | 1.71E-02 |
| 224750_at    | RNF185          | -2.25 | 4.96E-02 | -2.27 | 2.29E-04 |
| 244043_at    | TFDP2           | -2.39 | 4.10E-03 | -2.27 | 7.29E-04 |
| 235279_at    | PARVA           | -3.34 | 3.72E-03 | -2.26 | 5.23E-04 |
| 212153_at    | POGZ            | -4.01 | 5.35E-03 | -2.26 | 2.12E-02 |
| 203589_s_at  | TFDP2           | -3.30 | 7.77E-03 | -2.26 | 1.14E-03 |
| 219175_s_at  | SLC41A3         | -2.47 | 2.83E-03 | -2.26 | 1.98E-02 |
| 229910_at    | SHE             | -2.73 | 2.36E-02 | -2.26 | 1.03E-02 |
| 216954_x_at  | ATP5O           | -2.06 | 1.50E-02 | -2.26 | 4.25E-02 |
| 213792_s_at  | INSR            | -2.16 | 1.62E-02 | -2.25 | 4.50E-04 |
| 208871_at    | ATN1            | -1.99 | 2.09E-02 | -2.25 | 6.94E-03 |
| 202749_at    | WRB             | -2.88 | 4.92E-02 | -2.25 | 3.47E-03 |
| 40562_at     | GNA11           | -2.45 | 1.38E-02 | -2.25 | 8.81E-04 |
| 201032_at    | BLCAP           | -3.96 | 1.24E-04 | -2.24 | 1.58E-03 |
| 204045_at    | TCEAL1          | -2.48 | 3.05E-02 | -2.24 | 1.14E-02 |
| 228345_at    | CHIC1           | -3.07 | 3.79E-02 | -2.23 | 2.00E-02 |
| 224522_s_at  | DCAKD           | -2.89 | 2.90E-03 | -2.23 | 4.40E-03 |
| 211621_at    | AR              | -2.89 | 3.40E-02 | -2.22 | 4.61E-03 |
| 218194_at    | REXO2           | -3.24 | 3.07E-02 | -2.22 | 2.72E-02 |
| 242532_at    | ---             | -3.43 | 1.53E-02 | -2.22 | 2.90E-02 |
| 224993_at    | MLLT1           | -2.42 | 1.98E-02 | -2.21 | 4.76E-02 |
| 208769_at    | EIF4EBP2        | -4.02 | 6.70E-03 | -2.21 | 1.22E-03 |
| 209206_at    | ---             | -2.31 | 3.27E-02 | -2.21 | 5.81E-03 |
| 214480_at    | ETV3            | -2.54 | 1.05E-02 | -2.21 | 1.82E-02 |
| 1555270_a_at | WFS1            | -2.12 | 4.80E-02 | -2.21 | 2.00E-03 |
| 227692_at    | GNAI1           | -4.31 | 1.33E-04 | -2.20 | 4.38E-02 |
| 228813_at    | HDAC4           | -1.84 | 2.74E-02 | -2.20 | 7.25E-04 |
| 221473_x_at  | SERINC3         | -2.05 | 3.94E-02 | -2.20 | 3.08E-02 |
| 208093_s_at  | NDEL1           | -2.46 | 4.43E-02 | -2.19 | 1.51E-02 |
| 212872_s_at  | MED20           | -2.45 | 3.67E-02 | -2.19 | 4.44E-02 |
| 207230_at    | CDON            | -3.35 | 8.84E-03 | -2.19 | 2.87E-02 |

|              |                        |       |          |       |          |
|--------------|------------------------|-------|----------|-------|----------|
| 220911_s_at  | NYNRIN                 | -2.22 | 2.28E-02 | -2.19 | 1.09E-02 |
| 216308_x_at  | GRHPR                  | -2.31 | 2.74E-02 | -2.19 | 3.72E-03 |
| 218697_at    | NCKIPSD                | -2.69 | 7.76E-03 | -2.18 | 1.95E-02 |
| 204506_at    | PPP3R1                 | -2.63 | 1.40E-02 | -2.18 | 3.38E-03 |
| 201904_s_at  | CTDSPL                 | -2.49 | 1.49E-02 | -2.18 | 4.06E-03 |
| 36553_at     | ASMTL                  | -2.43 | 4.74E-02 | -2.17 | 1.63E-03 |
| 227780_s_at  | ECSCR                  | -2.67 | 4.34E-02 | -2.17 | 4.17E-04 |
| 202365_at    | UNC119B                | -2.67 | 8.29E-03 | -2.17 | 3.83E-03 |
| 223459_s_at  | C1orf56                | -2.70 | 1.92E-03 | -2.16 | 6.09E-04 |
| 219067_s_at  | NSMCE4A                | -2.67 | 2.58E-02 | -2.15 | 1.64E-02 |
| 207129_at    | CA5B                   | -3.85 | 5.13E-03 | -2.15 | 2.76E-03 |
| 213351_s_at  | TMCC1                  | -2.65 | 3.53E-02 | -2.15 | 2.00E-02 |
| 226112_at    | SGCB                   | -2.57 | 4.48E-02 | -2.15 | 1.28E-03 |
| 1552923_a_at | PITPNM2                | -2.69 | 4.62E-02 | -2.15 | 2.65E-02 |
| 218957_s_at  | PAAF1                  | -2.78 | 3.04E-02 | -2.14 | 8.30E-03 |
| 221864_at    | ORAI3                  | -2.37 | 2.72E-02 | -2.13 | 4.34E-04 |
| 1555668_a_at | PARK2                  | -2.42 | 2.04E-02 | -2.13 | 8.28E-03 |
| 1557380_at   | AGAP11                 | -2.72 | 2.73E-02 | -2.13 | 2.19E-02 |
| 223266_at    | STRADB                 | -2.39 | 3.31E-02 | -2.13 | 1.20E-02 |
| 209605_at    | TST                    | -2.28 | 1.99E-02 | -2.12 | 1.44E-03 |
| 35685_at     | RING1                  | -1.95 | 4.55E-02 | -2.12 | 1.96E-02 |
| 226157_at    | TFDP2                  | -2.79 | 2.11E-02 | -2.12 | 4.31E-03 |
| 219072_at    | BCL7C                  | -1.92 | 2.32E-02 | -2.11 | 4.44E-04 |
| 212739_s_at  | NME4                   | -2.23 | 1.46E-02 | -2.11 | 1.28E-03 |
| 1556116_s_at | TNPO1                  | -2.66 | 1.60E-02 | -2.11 | 3.20E-02 |
| 229698_at    | SHANK3                 | -2.35 | 4.92E-02 | -2.11 | 4.97E-02 |
| 53991_at     | DENND2A                | -2.80 | 1.92E-03 | -2.11 | 1.45E-02 |
| 203035_s_at  | LOC101060431 /// PIAS3 | -2.39 | 4.18E-02 | -2.10 | 1.09E-02 |
| 205854_at    | TULP3                  | -2.94 | 1.28E-02 | -2.10 | 9.29E-03 |
| 213264_at    | PCBP2                  | -2.17 | 3.13E-02 | -2.10 | 7.34E-03 |
| 227022_at    | GNPDA2                 | -2.59 | 1.79E-02 | -2.09 | 5.09E-03 |
| 226207_at    | RILPL1                 | -2.98 | 3.37E-02 | -2.09 | 6.23E-04 |
| 233882_s_at  | SEMA6D                 | -3.05 | 6.31E-03 | -2.09 | 7.31E-03 |
| 235293_at    | ---                    | -2.98 | 9.80E-04 | -2.09 | 7.37E-04 |
| 233825_s_at  | CD99L2                 | -2.43 | 1.93E-02 | -2.08 | 8.05E-03 |
| 204310_s_at  | NPR2                   | -2.21 | 3.33E-02 | -2.08 | 3.00E-03 |
| 237777_at    | PFKFB1                 | -2.58 | 2.07E-02 | -2.07 | 3.85E-02 |
| 219825_at    | CYP26B1                | -2.40 | 1.01E-02 | -2.07 | 1.88E-02 |
| 229410_at    | SLC35E1                | -2.47 | 3.02E-02 | -2.07 | 9.33E-03 |
| 220170_at    | FHL5                   | -4.06 | 2.80E-02 | -2.07 | 4.44E-02 |
| 226049_at    | ERC1                   | -1.89 | 1.26E-02 | -2.07 | 1.96E-03 |
| 243691_at    | ---                    | -4.27 | 4.05E-04 | -2.06 | 2.81E-03 |
| 208869_s_at  | GABARAPL1              | -2.51 | 9.78E-04 | -2.06 | 1.05E-04 |

|             |                                      |       |          |       |          |
|-------------|--------------------------------------|-------|----------|-------|----------|
| 222734_at   | WARS2                                | -3.41 | 1.04E-02 | -2.06 | 1.40E-02 |
| 219137_s_at | MFF                                  | -2.71 | 3.61E-02 | -2.06 | 4.35E-02 |
| 220261_s_at | ZDHHC4                               | -2.23 | 1.37E-02 | -2.05 | 2.26E-02 |
| 201732_s_at | CLCN3                                | -2.82 | 3.44E-02 | -2.04 | 1.18E-02 |
| 205120_s_at | SGCB                                 | -2.52 | 3.10E-02 | -2.04 | 7.91E-04 |
| 226257_x_at | MRPS22                               | -2.38 | 3.02E-03 | -2.04 | 3.60E-02 |
| 225389_at   | BTBD6                                | -2.43 | 3.70E-03 | -2.03 | 2.28E-02 |
| 228730_s_at | SCRN2                                | -2.14 | 1.24E-02 | -2.03 | 1.12E-02 |
| 219713_at   | SHPK                                 | -3.03 | 7.57E-04 | -2.03 | 1.92E-02 |
| 226114_at   | ZNF436                               | -2.73 | 3.77E-02 | -2.03 | 2.33E-03 |
| 1557954_at  | TXLNG                                | -3.25 | 2.44E-02 | -2.03 | 2.25E-02 |
| 216210_x_at | TRIOBP                               | -2.02 | 4.02E-02 | -2.03 | 2.35E-02 |
| 232570_s_at | ADAM33                               | -5.62 | 3.70E-03 | -2.03 | 2.41E-02 |
| 224197_s_at | C1QTNF1                              | -2.70 | 2.67E-02 | -2.02 | 3.25E-02 |
| 222425_s_at | POLDIP2                              | -1.97 | 2.46E-02 | -2.02 | 8.15E-03 |
| 210790_s_at | SAR1A                                | -2.57 | 3.38E-02 | -2.02 | 2.62E-02 |
| 223191_at   | COX16                                | -3.06 | 2.11E-02 | -2.02 | 2.75E-02 |
| 200083_at   | USP22                                | -2.45 | 5.06E-03 | -2.02 | 2.98E-02 |
| 201120_s_at | PGRMC1                               | -2.91 | 1.25E-02 | -2.02 | 3.16E-02 |
| 242264_at   | ---                                  | -3.03 | 3.08E-03 | -2.01 | 9.91E-03 |
| 210473_s_at | GPR125                               | -3.08 | 2.99E-02 | -2.01 | 1.99E-02 |
| 209256_s_at | KLHDC10                              | -3.49 | 2.84E-03 | -2.01 | 1.16E-02 |
| 225844_at   | POLE4                                | -1.92 | 1.64E-02 | -2.01 | 1.87E-03 |
| 211596_s_at | LRIG1                                | -3.57 | 4.83E-03 | -2.01 | 3.03E-02 |
| 202915_s_at | FAM20B                               | -2.76 | 4.59E-02 | -2.00 | 2.00E-02 |
| 234312_s_at | ACSS2                                | -1.85 | 2.05E-02 | -2.00 | 4.43E-02 |
| 201325_s_at | EMP1                                 | -2.96 | 4.38E-02 | -2.00 | 1.31E-02 |
| 224685_at   | MLLT4                                | -2.38 | 4.28E-02 | -2.00 | 2.26E-02 |
| 213627_at   | MAGED2                               | -2.44 | 3.36E-02 | -2.00 | 4.98E-03 |
| 35846_at    | THRA                                 | -1.96 | 4.55E-02 | -1.99 | 2.09E-03 |
| 239210_at   | OTTHUMG00000184145 /// RP11-477H21.2 | -3.29 | 1.18E-02 | -1.99 | 4.28E-03 |
| 211928_at   | DYNC1H1                              | -2.34 | 4.44E-02 | -1.99 | 3.33E-02 |
| 228740_at   | OTTHUMG00000172945 /// RP11-999E24.3 | -2.74 | 2.52E-02 | -1.99 | 6.34E-03 |
| 226656_at   | CRTAP                                | -2.17 | 1.60E-02 | -1.99 | 9.75E-04 |
| 33736_at    | STOML1                               | -1.96 | 1.40E-02 | -1.99 | 1.57E-03 |
| 219097_x_at | SMIM7                                | -2.21 | 1.87E-02 | -1.98 | 2.04E-02 |
| 226087_at   | LZIC                                 | -2.07 | 2.42E-02 | -1.98 | 1.42E-03 |
| 225968_at   | PRICKLE2                             | -2.20 | 1.53E-02 | -1.98 | 6.13E-04 |
| 231546_at   | ---                                  | -2.91 | 4.61E-02 | -1.98 | 3.77E-02 |
| 203450_at   | CBY1                                 | -2.20 | 2.00E-03 | -1.97 | 1.89E-03 |
| 241986_at   | BMPER                                | -2.45 | 3.68E-02 | -1.97 | 1.51E-02 |

|              |                   |       |          |       |          |
|--------------|-------------------|-------|----------|-------|----------|
| 44696_at     | TBC1D13           | -1.85 | 1.52E-02 | -1.97 | 1.42E-03 |
| 212912_at    | RPS6KA2           | -3.82 | 1.28E-02 | -1.97 | 4.52E-02 |
| 212992_at    | AHNAK2            | -2.70 | 1.40E-02 | -1.96 | 2.31E-02 |
| 203581_at    | RAB4A /// SPHAR   | -2.16 | 4.45E-02 | -1.96 | 2.18E-02 |
| 1552627_a_at | ARHGAP5           | -3.34 | 4.16E-04 | -1.96 | 2.60E-02 |
| 203860_at    | PCCA              | -2.75 | 7.19E-03 | -1.96 | 6.33E-03 |
| 214531_s_at  | SNX1              | -2.62 | 1.48E-02 | -1.96 | 6.38E-03 |
| 230644_at    | LRFN5             | -2.82 | 1.18E-03 | -1.95 | 1.59E-02 |
| 217707_x_at  | SMARCA2           | -2.94 | 2.25E-02 | -1.95 | 9.82E-03 |
| 219205_at    | SRR               | -2.25 | 2.63E-02 | -1.95 | 3.86E-03 |
| 215192_at    | PMS2P4            | -2.86 | 9.60E-03 | -1.95 | 3.44E-02 |
| 219418_at    | NHEJ1 /// SLC23A3 | -2.10 | 3.99E-02 | -1.95 | 7.07E-03 |
| 224792_at    | TNKS1BP1          | -2.54 | 3.26E-03 | -1.94 | 2.32E-03 |
| 217246_s_at  | DIAPH2            | -3.65 | 5.43E-03 | -1.94 | 2.56E-02 |
| 224704_at    | TNRC6A            | -2.62 | 2.81E-02 | -1.94 | 2.55E-02 |
| 215735_s_at  | TSC2              | -2.24 | 1.54E-02 | -1.93 | 4.17E-02 |
| 203006_at    | INPP5A            | -2.59 | 2.03E-02 | -1.93 | 1.65E-02 |
| 225590_at    | SH3RF1            | -2.10 | 2.76E-02 | -1.93 | 1.60E-03 |
| 1554424_at   | FIP1L1            | -3.05 | 6.00E-03 | -1.92 | 1.69E-02 |
| 229461_x_at  | NEGR1             | -2.76 | 1.51E-02 | -1.92 | 6.39E-03 |
| 212157_at    | SDC2              | -3.94 | 2.59E-03 | -1.91 | 1.41E-02 |
| 217025_s_at  | DBN1              | -2.49 | 4.11E-02 | -1.91 | 7.00E-03 |
| 220032_at    | CPED1             | -2.58 | 5.21E-03 | -1.91 | 7.76E-03 |
| 201361_at    | TMEM109           | -1.91 | 6.72E-03 | -1.91 | 2.34E-02 |
| 202261_at    | VPS72             | -2.44 | 3.45E-02 | -1.91 | 4.09E-02 |
| 225660_at    | SEMA6A            | -3.61 | 2.23E-03 | -1.91 | 2.77E-02 |
| 228942_s_at  | DAB2IP            | -2.25 | 4.99E-02 | -1.91 | 9.53E-03 |
| 205188_s_at  | SMAD5             | -1.99 | 3.95E-02 | -1.90 | 1.32E-03 |
| 228299_at    | KCTD20            | -2.27 | 2.48E-02 | -1.90 | 1.75E-02 |
| 203197_s_at  | C1orf123          | -2.19 | 5.40E-03 | -1.90 | 2.31E-02 |
| 226931_at    | TMTC1             | -2.66 | 3.04E-02 | -1.90 | 2.00E-02 |
| 207842_s_at  | CASC3             | -2.49 | 4.98E-03 | -1.90 | 7.06E-03 |
| 213272_s_at  | TMEM159           | -2.30 | 2.10E-02 | -1.90 | 1.99E-02 |
| 1555864_s_at | PDHA1             | -2.60 | 3.70E-03 | -1.90 | 2.67E-02 |
| 238032_at    | ---               | -2.37 | 6.69E-03 | -1.89 | 1.52E-02 |
| 210078_s_at  | KCNAB1            | -2.39 | 3.53E-02 | -1.89 | 2.47E-03 |
| 212677_s_at  | CEP68             | -2.31 | 3.73E-02 | -1.89 | 3.70E-02 |
| 232693_s_at  | FBXO16 /// ZNF395 | -2.23 | 4.43E-03 | -1.88 | 1.81E-02 |
| 224886_at    | JMJD8             | -1.74 | 4.38E-02 | -1.88 | 3.88E-03 |
| 208941_s_at  | SEPHS1            | -2.26 | 7.75E-03 | -1.88 | 1.34E-02 |
| 206352_s_at  | PEX10             | -2.31 | 3.89E-04 | -1.88 | 1.03E-03 |
| 215945_s_at  | TRIM2             | -2.96 | 2.74E-03 | -1.88 | 2.83E-02 |
| 201570_at    | SAMM50            | -2.57 | 1.17E-02 | -1.88 | 1.78E-02 |



|              |                                    |       |          |       |          |
|--------------|------------------------------------|-------|----------|-------|----------|
| 201256_at    | COX7A2L                            | -2.24 | 4.38E-02 | -1.87 | 2.79E-02 |
| 230326_s_at  | C11orf73                           | -3.06 | 2.48E-03 | -1.87 | 2.82E-02 |
| 209242_at    | PEG3                               | -2.45 | 1.99E-02 | -1.87 | 9.13E-03 |
| 40016_g_at   | MAST4                              | -2.39 | 4.11E-03 | -1.87 | 2.35E-02 |
| 203367_at    | DUSP14                             | -1.92 | 9.97E-03 | -1.86 | 2.34E-02 |
| 229844_at    | FOXP1                              | -2.77 | 2.66E-02 | -1.86 | 3.22E-02 |
| 227625_s_at  | STUB1                              | -1.85 | 3.09E-02 | -1.86 | 3.98E-02 |
| 203187_at    | DOCK1                              | -2.40 | 8.89E-03 | -1.86 | 9.00E-04 |
| 214736_s_at  | ADD1                               | -1.90 | 1.79E-02 | -1.85 | 4.21E-03 |
| 204829_s_at  | FOLR2                              | -2.57 | 3.69E-02 | -1.85 | 3.25E-02 |
| 237154_at    | OTTHUMG00000036478 /// RP1-28O10.1 | -2.96 | 5.03E-04 | -1.85 | 3.87E-02 |
| 242590_at    | ---                                | -3.22 | 2.98E-02 | -1.85 | 3.72E-03 |
| 201080_at    | PIP4K2B                            | -1.99 | 4.35E-02 | -1.85 | 1.38E-03 |
| 210276_s_at  | TRIOBP                             | -2.15 | 1.02E-02 | -1.85 | 2.77E-03 |
| 206684_s_at  | ATF7                               | -2.63 | 1.11E-03 | -1.85 | 2.96E-03 |
| 223066_at    | SNAPIN                             | -2.13 | 4.50E-02 | -1.84 | 2.44E-03 |
| 223311_s_at  | MTA3                               | -2.35 | 8.54E-04 | -1.83 | 1.82E-02 |
| 206649_s_at  | TFE3                               | -2.10 | 3.83E-02 | -1.83 | 1.19E-03 |
| 226728_at    | SLC27A1                            | -2.11 | 1.84E-02 | -1.83 | 3.00E-03 |
| 206870_at    | PPARA                              | -2.50 | 1.65E-02 | -1.82 | 5.53E-03 |
| 204505_s_at  | DMTN                               | -2.46 | 2.64E-03 | -1.82 | 1.10E-02 |
| 234937_x_at  | ZFP28                              | -3.22 | 1.69E-02 | -1.82 | 1.76E-02 |
| 1554429_a_at | DMWD                               | -1.85 | 4.31E-02 | -1.82 | 2.05E-02 |
| 202032_s_at  | MAN2A2                             | -1.95 | 3.06E-02 | -1.81 | 4.65E-04 |
| 214582_at    | PDE3B                              | -2.98 | 2.28E-02 | -1.81 | 3.19E-02 |
| 213501_at    | ACOX1                              | -2.49 | 2.80E-02 | -1.81 | 1.35E-02 |
| 222481_at    | TIMM10B                            | -1.86 | 2.87E-02 | -1.81 | 1.25E-02 |
| 221964_at    | TULP3                              | -1.90 | 2.53E-02 | -1.81 | 3.27E-03 |
| 212482_at    | RMND5A                             | -1.99 | 4.13E-02 | -1.81 | 6.72E-03 |
| 201905_s_at  | CTDSPL                             | -1.91 | 1.23E-02 | -1.81 | 7.07E-03 |
| 210438_x_at  | TROVE2                             | -2.55 | 1.10E-02 | -1.81 | 1.63E-02 |
| 223216_x_at  | FBXO16 /// ZNF395                  | -2.13 | 5.13E-03 | -1.80 | 2.20E-03 |
| 218208_at    | PQLC1                              | -1.94 | 1.16E-02 | -1.80 | 8.33E-03 |
| 207050_at    | CACNA2D1                           | -2.38 | 4.58E-02 | -1.80 | 2.71E-02 |
| 222841_s_at  | TIMM22                             | -2.01 | 2.70E-02 | -1.79 | 1.46E-03 |
| 202590_s_at  | PDK2                               | -2.72 | 1.24E-03 | -1.79 | 7.51E-03 |
| 211599_x_at  | MET                                | -2.84 | 1.19E-02 | -1.79 | 3.15E-02 |
| 227063_at    | TMEM256                            | -2.60 | 7.96E-03 | -1.78 | 5.45E-03 |
| 225422_at    | CDC26                              | -2.74 | 3.59E-02 | -1.78 | 1.68E-02 |
| 227151_at    | SNX33                              | -2.13 | 2.18E-02 | -1.78 | 2.59E-04 |
| 231963_at    | ANKRD33B                           | -1.91 | 2.80E-02 | -1.78 | 1.50E-02 |
| 225816_at    | PHF17                              | -2.83 | 3.16E-02 | -1.78 | 2.08E-02 |
| 212126_at    | CBX5                               | -1.93 | 3.84E-02 | -1.78 | 1.71E-02 |

|             |                   |       |          |       |          |
|-------------|-------------------|-------|----------|-------|----------|
| 212655_at   | ZCCHC14           | -2.37 | 3.94E-02 | -1.77 | 1.45E-02 |
| 204306_s_at | CD151             | -2.04 | 2.58E-02 | -1.77 | 8.94E-03 |
| 227727_at   | MRGPRF            | -2.03 | 4.81E-02 | -1.76 | 2.22E-02 |
| 223321_s_at | FGFRL1            | -1.93 | 3.40E-02 | -1.76 | 3.61E-03 |
| 207469_s_at | PIR               | -2.28 | 4.99E-02 | -1.76 | 9.94E-03 |
| 213103_at   | STARD13           | -2.05 | 4.85E-02 | -1.76 | 2.63E-02 |
| 242034_at   | FBXL17            | -3.67 | 1.75E-02 | -1.75 | 2.26E-02 |
| 222921_s_at | HEY2              | -2.46 | 3.54E-02 | -1.75 | 4.16E-02 |
| 220753_s_at | CRYL1             | -2.55 | 6.47E-03 | -1.75 | 8.66E-03 |
| 226360_at   | ZNRF3             | -3.05 | 2.78E-02 | -1.74 | 2.92E-02 |
| 220454_s_at | SEMA6A            | -2.25 | 4.68E-02 | -1.74 | 2.78E-02 |
| 209522_s_at | CRAT              | -2.14 | 3.35E-02 | -1.74 | 1.84E-02 |
| 204227_s_at | TK2               | -2.18 | 7.03E-03 | -1.72 | 2.20E-03 |
| 208446_s_at | ZFYVE9            | -2.32 | 2.43E-03 | -1.72 | 2.89E-02 |
| 223366_at   | ZNF704            | -1.97 | 3.83E-02 | -1.71 | 3.50E-02 |
| 204168_at   | MGST2             | -2.20 | 4.09E-02 | -1.71 | 2.29E-02 |
| 214082_at   | CA5B              | -1.95 | 4.03E-02 | -1.71 | 1.36E-02 |
| 212522_at   | PDE8A             | -1.92 | 8.50E-03 | -1.70 | 4.56E-02 |
| 221123_x_at | FBXO16 /// ZNF395 | -2.81 | 1.75E-04 | -1.70 | 1.91E-02 |
| 205981_s_at | ING2              | -2.17 | 4.17E-02 | -1.69 | 2.59E-02 |
| 212134_at   | PHLDB1            | -2.30 | 9.71E-03 | -1.69 | 1.92E-02 |
| 231826_at   | RALGAPA2          | -2.51 | 1.29E-02 | -1.69 | 1.07E-02 |
| 202227_s_at | BRD8              | -2.78 | 9.21E-03 | -1.67 | 4.77E-02 |
| 200759_x_at | NFE2L1            | -2.24 | 6.82E-03 | -1.67 | 4.12E-02 |
| 209482_at   | POP7              | -2.11 | 1.42E-02 | -1.67 | 1.83E-02 |
| 218882_s_at | WDR3              | -1.93 | 2.93E-02 | -1.66 | 2.32E-02 |
| 223305_at   | TMEM216           | -2.40 | 1.31E-02 | -1.66 | 2.43E-03 |
| 204800_s_at | DHRS12            | -1.96 | 1.20E-02 | -1.66 | 1.08E-02 |
| 225511_at   | GPRC5B            | -2.79 | 2.96E-03 | -1.66 | 2.45E-02 |
| 225972_at   | TMEM64            | -1.93 | 3.32E-02 | -1.62 | 2.47E-02 |
| 228605_at   | UBXN2A            | -2.61 | 2.64E-03 | -1.62 | 2.78E-02 |
| 202177_at   | GAS6              | -1.95 | 2.24E-02 | -1.61 | 3.18E-02 |
| 52005_at    | WIZ               | -1.79 | 3.79E-02 | -1.61 | 3.01E-02 |
| 226139_at   | CCDC149           | -2.67 | 2.73E-03 | -1.60 | 1.53E-02 |
| 222711_s_at | RHBDF1            | -1.94 | 2.21E-02 | -1.60 | 2.17E-02 |
| 202012_s_at | EXT2              | -2.20 | 3.24E-02 | -1.60 | 6.68E-03 |
| 226850_at   | SUMF1             | -2.52 | 2.14E-03 | -1.60 | 1.81E-02 |
| 218262_at   | RMND5B            | -1.72 | 2.87E-02 | -1.60 | 3.81E-02 |
| 223703_at   | C10orf11          | -2.08 | 3.26E-02 | -1.59 | 1.38E-02 |
| 215198_s_at | CALD1             | -2.44 | 2.40E-02 | -1.59 | 1.79E-02 |
| 201851_at   | SH3GL1            | -2.36 | 3.75E-03 | -1.58 | 2.22E-02 |
| 564_at      | GNA11             | -2.43 | 4.23E-03 | -1.58 | 4.66E-02 |
| 32836_at    | AGPAT1            | -1.82 | 4.00E-02 | -1.58 | 6.62E-03 |

## Supplement 43

|             |         |       |          |       |          |
|-------------|---------|-------|----------|-------|----------|
| 227054_at   | N6AMT2  | -1.90 | 3.16E-02 | -1.57 | 3.39E-02 |
| 225958_at   | PHC1    | -1.86 | 4.26E-02 | -1.57 | 4.27E-02 |
| 227113_at   | ADHFE1  | -1.88 | 2.81E-02 | -1.56 | 3.31E-02 |
| 218100_s_at | IFT57   | -2.40 | 2.12E-02 | -1.56 | 2.44E-02 |
| 219013_at   | GALNT11 | -2.65 | 1.58E-02 | -1.54 | 3.88E-02 |
| 225489_at   | TMEM18  | -2.23 | 8.35E-03 | -1.53 | 4.85E-02 |
| 203538_at   | CAMLG   | -2.88 | 3.26E-03 | -1.51 | 3.32E-02 |

**Supplemental Table 3.** Probe sets indicating increased expression of genes in anterior orbit tissues from subjects with GPA compared to tissues from subjects with sarcoidosis.

| Probe Set    | Gene Symbol                             | Fold Difference | FDR p-value |
|--------------|-----------------------------------------|-----------------|-------------|
| 210393_at    | LGR5                                    | 1.95            | 4.73E-02    |
| 239461_at    | GALNT15                                 | 1.89            | 4.42E-02    |
| 205968_at    | KCNS3                                   | 1.84            | 3.60E-02    |
| 210331_at    | HECW1                                   | 1.84            | 2.26E-02    |
| 214424_s_at  | ALDOB                                   | 1.83            | 4.43E-02    |
| 1558803_at   | ---                                     | 1.78            | 3.40E-02    |
| 1563590_at   | ---                                     | 1.77            | 2.51E-02    |
| 220244_at    | LINC00312                               | 1.75            | 1.35E-02    |
| 1554580_a_at | WWP2                                    | 1.75            | 1.42E-02    |
| 202895_s_at  | SIRPA                                   | 1.72            | 3.83E-02    |
| 1564251_at   | EMID1                                   | 1.72            | 2.32E-02    |
| 243955_at    | ---                                     | 1.72            | 6.36E-03    |
| 1561676_at   | PRICKLE2-AS3                            | 1.71            | 1.11E-02    |
| 1555225_at   | C1orf43                                 | 1.70            | 3.02E-02    |
| 1561961_at   | PHF2P1                                  | 1.69            | 4.88E-02    |
| 1554946_at   | LOC100506465                            | 1.69            | 2.38E-03    |
| 231621_at    | MPZL1                                   | 1.68            | 2.61E-02    |
| 1564000_at   | ANKRD31                                 | 1.67            | 5.85E-04    |
| 204738_s_at  | KRIT1                                   | 1.67            | 5.21E-03    |
| 231355_at    | CACNG8                                  | 1.67            | 2.83E-02    |
| 207309_at    | NOS1                                    | 1.67            | 4.41E-02    |
| 232768_at    | CCNB2                                   | 1.66            | 4.50E-03    |
| 1555332_at   | TPH2                                    | 1.63            | 1.47E-02    |
| 1552458_at   | MBD3L1                                  | 1.63            | 2.32E-02    |
| 230055_at    | KHDC1                                   | 1.63            | 4.31E-02    |
| 236543_at    | ---                                     | 1.62            | 3.43E-02    |
| 241030_at    | ---                                     | 1.61            | 4.04E-03    |
| 234683_at    | KRTAP4-11 /// KRTAP4-6 /// LOC100134267 | 1.61            | 3.08E-02    |
| 241733_at    | C18orf54                                | 1.59            | 2.61E-02    |
| 1562821_a_at | DSCAM-AS1                               | 1.59            | 3.81E-02    |
| 1557615_a_at | ARHGAP19                                | 1.59            | 2.80E-02    |
| 210957_s_at  | AFF2                                    | 1.58            | 3.62E-02    |
| 232956_at    | ---                                     | 1.58            | 2.60E-02    |
| 234546_at    | AC003973.4 /// OTTHUMG00000182925       | 1.58            | 3.78E-02    |
| 233858_at    | OTTHUMG00000173031 /// RP11-25E2.2      | 1.57            | 2.15E-02    |
| 1564758_at   | LOC643659                               | 1.57            | 4.47E-02    |
| 228116_at    | ---                                     | 1.57            | 2.25E-02    |
| 207268_x_at  | ABI2                                    | 1.56            | 3.86E-02    |

|              |                                     |      |          |
|--------------|-------------------------------------|------|----------|
| 243839_s_at  | ---                                 | 1.55 | 6.46E-03 |
| 1557837_a_at | ELMOD2                              | 1.55 | 2.00E-02 |
| 228235_at    | MIR503HG                            | 1.55 | 2.46E-02 |
| 219722_s_at  | GDPD3                               | 1.55 | 2.17E-02 |
| 236470_at    | ---                                 | 1.54 | 6.65E-03 |
| 238289_at    | ---                                 | 1.54 | 4.98E-02 |
| 1557513_a_at | ---                                 | 1.54 | 4.77E-02 |
| 201915_at    | SEC63                               | 1.54 | 4.38E-02 |
| 1557280_s_at | ITSN1                               | 1.53 | 3.80E-02 |
| 1557709_at   | OTTHUMG00000175952 /// RP1-140C12.2 | 1.53 | 2.92E-02 |
| 230153_at    | NEK9                                | 1.53 | 4.59E-02 |
| 244299_at    | ---                                 | 1.50 | 4.76E-02 |
| 223304_at    | SLC37A3                             | 1.50 | 2.56E-02 |
| 229762_at    | ---                                 | 1.50 | 4.06E-02 |
| 243484_x_at  | ---                                 | 1.50 | 4.77E-02 |
| 1566181_at   | ---                                 | 1.50 | 4.50E-02 |

**Supplemental Table 4.** Probe sets indicating decreased expression of genes in anterior orbit tissues from subjects with GPA compared to tissues from subjects with sarcoidosis.

| Probe Set    | Gene Symbol                                                             | Fold Difference | FDR p-value |
|--------------|-------------------------------------------------------------------------|-----------------|-------------|
| 218404_at    | SNX10                                                                   | -9.19           | 5.73E-03    |
| 1555745_a_at | LYZ                                                                     | -8.86           | 1.37E-02    |
| 209396_s_at  | CHI3L1                                                                  | -8.67           | 1.99E-02    |
| 32128_at     | CCL18 /// LOC101060271                                                  | -8.18           | 4.74E-02    |
| 209395_at    | CHI3L1                                                                  | -8.08           | 9.95E-04    |
| 203915_at    | CXCL9                                                                   | -7.65           | 3.41E-02    |
| 206227_at    | CILP                                                                    | -7.62           | 4.86E-04    |
| 1558034_s_at | CP                                                                      | -7.61           | 1.48E-02    |
| 206134_at    | ADAMDEC1                                                                | -7.57           | 1.49E-02    |
| 212671_s_at  | HLA-DQA1 /// HLA-DQA2 /// LOC100509457                                  | -7.30           | 1.13E-02    |
| 200887_s_at  | STAT1                                                                   | -7.22           | 4.58E-03    |
| 204846_at    | CP                                                                      | -6.97           | 2.84E-02    |
| 209924_at    | CCL18 /// LOC101060271                                                  | -6.90           | 4.46E-02    |
| 1566342_at   | SOD2                                                                    | -6.79           | 2.01E-02    |
| 336_at       | TBXA2R                                                                  | -6.77           | 1.17E-03    |
| 215891_s_at  | GM2A                                                                    | -6.70           | 1.10E-03    |
| 1567628_at   | CD74                                                                    | -6.65           | 4.02E-03    |
| 223484_at    | C15orf48                                                                | -6.51           | 6.70E-03    |
| 201141_at    | GPNMB                                                                   | -6.43           | 3.84E-02    |
| 205676_at    | CYP27B1                                                                 | -6.16           | 3.85E-03    |
| 211470_s_at  | SULT1C2                                                                 | -6.14           | 1.34E-02    |
| 208168_s_at  | CHIT1                                                                   | -6.08           | 1.25E-02    |
| 208691_at    | TFRC                                                                    | -5.86           | 3.69E-02    |
| 202269_x_at  | GBP1                                                                    | -5.82           | 2.47E-02    |
| 201201_at    | CSTB                                                                    | -5.65           | 1.41E-02    |
| 215223_s_at  | LOC100129518 /// SOD2                                                   | -5.53           | 1.26E-02    |
| 209969_s_at  | STAT1                                                                   | -5.45           | 1.01E-02    |
| 210982_s_at  | HLA-DRA                                                                 | -5.26           | 1.29E-02    |
| 225647_s_at  | CTSC                                                                    | -5.23           | 4.01E-02    |
| 206420_at    | IGSF6                                                                   | -5.16           | 1.47E-03    |
| 209696_at    | FBP1                                                                    | -5.16           | 7.31E-04    |
| 214211_at    | FTH1                                                                    | -4.81           | 1.81E-02    |
| 202902_s_at  | CTSS                                                                    | -4.69           | 1.72E-02    |
| 215193_x_at  | HLA-DRB1 /// HLA-DRB3 /// HLA-DRB4 ///<br>LOC100507709 /// LOC100507714 | -4.69           | 6.75E-03    |
| 201137_s_at  | HLA-DPB1                                                                | -4.67           | 3.94E-02    |
| 209823_x_at  | HLA-DQB1 /// LOC101060835                                               | -4.63           | 5.84E-03    |
| 208864_s_at  | TXN                                                                     | -4.59           | 3.28E-02    |
| 205633_s_at  | ALAS1                                                                   | -4.44           | 1.10E-02    |

|              |                                                                     |       |          |
|--------------|---------------------------------------------------------------------|-------|----------|
| 203922_s_at  | CYBB                                                                | -4.38 | 2.12E-02 |
| 200628_s_at  | WARS                                                                | -4.35 | 9.73E-03 |
| 212998_x_at  | HLA-DQB1 /// LOC101060835<br>HLA-DRB1 /// HLA-DRB4 /// HLA-DRB5 /// | -4.31 | 3.42E-02 |
| 209312_x_at  | LOC100507709 /// LOC100507714                                       | -4.31 | 2.98E-02 |
| 223502_s_at  | TNFSF13B                                                            | -4.31 | 4.33E-02 |
| 200629_at    | WARS                                                                | -4.27 | 1.06E-02 |
| 202953_at    | C1QB                                                                | -4.21 | 4.94E-02 |
| 224399_at    | PDCD1LG2                                                            | -4.19 | 4.31E-03 |
| 212737_at    | GM2A                                                                | -4.15 | 6.17E-05 |
| 218232_at    | C1QA                                                                | -4.11 | 3.43E-02 |
| 222868_s_at  | IL18BP                                                              | -4.07 | 1.00E-02 |
| 202901_x_at  | CTSS                                                                | -4.07 | 9.15E-03 |
| 206214_at    | PLA2G7                                                              | -4.06 | 5.47E-03 |
| 227253_at    | CP                                                                  | -4.02 | 4.98E-02 |
| 207332_s_at  | TFRC                                                                | -3.97 | 3.12E-02 |
| 208306_x_at  | HLA-DRB1 /// LOC100507709 /// LOC100507714                          | -3.92 | 1.85E-03 |
| 217933_s_at  | LAP3                                                                | -3.89 | 3.43E-02 |
| 209727_at    | GM2A                                                                | -3.85 | 2.95E-04 |
| 1553706_at   | HTRA4                                                               | -3.84 | 4.94E-03 |
| 220049_s_at  | PDCD1LG2                                                            | -3.84 | 1.24E-02 |
| 217388_s_at  | KYNU                                                                | -3.80 | 1.21E-02 |
| 201850_at    | CAPG                                                                | -3.76 | 3.69E-04 |
| 203936_s_at  | MMP9                                                                | -3.73 | 2.42E-02 |
| 226878_at    | HLA-DOA                                                             | -3.64 | 1.31E-02 |
| 232617_at    | CTSS                                                                | -3.56 | 4.43E-02 |
| 235706_at    | CPM                                                                 | -3.55 | 3.99E-02 |
| 1555565_s_at | TAPBP                                                               | -3.53 | 2.71E-02 |
| 209230_s_at  | NUPR1                                                               | -3.52 | 3.86E-03 |
| 203920_at    | NR1H3                                                               | -3.45 | 3.48E-02 |
| 201118_at    | PGD                                                                 | -3.45 | 1.02E-02 |
| 205342_s_at  | SULT1C2                                                             | -3.45 | 1.31E-02 |
| 221266_s_at  | DCSTAMP                                                             | -3.37 | 2.10E-03 |
| 210152_at    | LILRB4                                                              | -3.36 | 3.24E-02 |
| 218424_s_at  | STEAP3                                                              | -3.29 | 9.53E-04 |
| 35820_at     | GM2A                                                                | -3.19 | 3.75E-04 |
| 1559776_at   | ---                                                                 | -3.17 | 1.17E-02 |
| 237215_s_at  | TFRC                                                                | -3.16 | 1.93E-02 |
| 220423_at    | PLA2G2D                                                             | -3.16 | 4.88E-02 |
| 211138_s_at  | KMO                                                                 | -3.12 | 1.10E-02 |
| 211656_x_at  | HLA-DQB1 /// LOC101060835                                           | -3.11 | 3.18E-02 |
| 208680_at    | PRDX1                                                               | -3.10 | 3.32E-02 |
| 203828_s_at  | IL32                                                                | -3.08 | 1.69E-02 |

|              |                          |       |          |
|--------------|--------------------------|-------|----------|
| 217373_x_at  | MDM2                     | -3.07 | 3.89E-02 |
| 235678_at    | GM2A                     | -3.07 | 6.42E-04 |
| 213198_at    | ACVR1B                   | -3.04 | 1.69E-02 |
| 219648_at    | MREG                     | -3.03 | 3.25E-02 |
| 223451_s_at  | CKLF                     | -3.01 | 1.40E-02 |
| 205404_at    | HSD11B1                  | -3.01 | 1.11E-02 |
| 225171_at    | ARHGAP18                 | -2.97 | 4.09E-02 |
| 217995_at    | SQRDL                    | -2.97 | 1.34E-02 |
| 211991_s_at  | HLA-DPA1                 | -2.96 | 1.69E-02 |
| 221875_x_at  | HLA-F                    | -2.93 | 4.44E-02 |
| 227265_at    | FGL2                     | -2.93 | 2.68E-02 |
| 211529_x_at  | HLA-G                    | -2.92 | 1.01E-02 |
| 218454_at    | PLBD1                    | -2.92 | 3.59E-03 |
| 212862_at    | CDS2                     | -2.91 | 1.48E-02 |
| 225924_at    | FNIP2                    | -2.91 | 8.89E-03 |
| 209545_s_at  | RIPK2                    | -2.81 | 1.42E-02 |
| 203932_at    | HLA-DMB                  | -2.79 | 1.80E-02 |
| 202411_at    | IFI27                    | -2.78 | 8.28E-03 |
| 1553151_at   | ATP6V0D2                 | -2.75 | 2.96E-03 |
| 216041_x_at  | GRN                      | -2.74 | 5.84E-03 |
| 226460_at    | FNIP2                    | -2.74 | 4.19E-02 |
| 206100_at    | CPM                      | -2.72 | 3.91E-02 |
| 226255_at    | ZBTB33                   | -2.70 | 4.58E-02 |
| 204493_at    | BID                      | -2.69 | 3.81E-02 |
| 205306_x_at  | KMO                      | -2.68 | 1.62E-02 |
| 223640_at    | HCST                     | -2.66 | 1.24E-02 |
| 209166_s_at  | MAN2B1                   | -2.59 | 1.89E-02 |
| 206313_at    | HLA-DOA                  | -2.59 | 1.46E-02 |
| 211582_x_at  | LST1                     | -2.58 | 2.03E-02 |
| 211528_x_at  | HLA-G                    | -2.58 | 4.72E-02 |
| 200678_x_at  | GRN                      | -2.57 | 7.96E-03 |
| 202679_at    | NPC1                     | -2.54 | 2.00E-02 |
| 239598_s_at  | LPCAT2                   | -2.51 | 2.02E-02 |
| 209329_x_at  | HIGD2A                   | -2.47 | 4.92E-02 |
| 1553043_a_at | CD300LF                  | -2.46 | 1.37E-02 |
| 225956_at    | CREBRF                   | -2.45 | 3.46E-02 |
| 207809_s_at  | ATP6AP1                  | -2.45 | 3.28E-02 |
| 204961_s_at  | NCF1 /// NCF1B /// NCF1C | -2.43 | 4.85E-02 |
| 214390_s_at  | BCAT1                    | -2.42 | 4.32E-02 |
| 214430_at    | GLA                      | -2.41 | 3.18E-03 |
| 221561_at    | SOAT1                    | -2.41 | 2.27E-02 |
| 202071_at    | SDC4                     | -2.40 | 4.23E-02 |
| 221983_at    | FAM134A                  | -2.39 | 3.73E-02 |



|              |           |       |          |
|--------------|-----------|-------|----------|
| 201272_at    | AKR1B1    | -2.39 | 4.43E-02 |
| 205174_s_at  | QPCT      | -2.37 | 1.75E-02 |
| 203096_s_at  | RAPGEF2   | -2.36 | 3.61E-02 |
| 222816_s_at  | ZCCHC2    | -2.35 | 3.23E-02 |
| 1555416_a_at | ALOX15B   | -2.35 | 1.83E-03 |
| 202675_at    | SDHB      | -2.35 | 4.70E-02 |
| 235643_at    | SAMD9L    | -2.30 | 3.35E-02 |
| 203454_s_at  | ATOX1     | -2.30 | 3.19E-02 |
| 211284_s_at  | GRN       | -2.29 | 8.22E-04 |
| 223501_at    | TNFSF13B  | -2.29 | 4.21E-02 |
| 221524_s_at  | RRAGD     | -2.29 | 2.37E-02 |
| 215536_at    | HLA-DQB2  | -2.27 | 4.10E-03 |
| 213415_at    | CLIC2     | -2.23 | 3.24E-02 |
| 227135_at    | NAAA      | -2.23 | 2.50E-02 |
| 212658_at    | LHFPL2    | -2.22 | 3.83E-02 |
| 208002_s_at  | ACOT7     | -2.22 | 7.81E-04 |
| 201551_s_at  | LAMP1     | -2.21 | 9.74E-03 |
| 222550_at    | ARMC1     | -2.21 | 2.83E-02 |
| 220832_at    | TLR8      | -2.19 | 2.74E-02 |
| 208608_s_at  | SNTB1     | -2.15 | 8.48E-03 |
| 213246_at    | TMEM251   | -2.13 | 3.17E-02 |
| 206991_s_at  | CCR5      | -2.12 | 4.74E-02 |
| 209164_s_at  | CYB561    | -2.11 | 1.33E-02 |
| 214992_s_at  | DNASE2    | -2.11 | 8.08E-03 |
| 1554508_at   | PIK3AP1   | -2.11 | 4.71E-02 |
| 235059_at    | RAB12     | -2.08 | 3.95E-02 |
| 219593_at    | SLC15A3   | -2.08 | 3.79E-03 |
| 204084_s_at  | CLN5      | -2.08 | 4.79E-02 |
| 203619_s_at  | FAIM2     | -2.08 | 5.61E-03 |
| 211832_s_at  | MDM2      | -2.08 | 3.45E-02 |
| 202896_s_at  | SIRPA     | -2.07 | 1.70E-02 |
| 223465_at    | COL4A3BP  | -2.07 | 4.34E-02 |
| 209749_s_at  | ACE       | -2.07 | 2.61E-05 |
| 204638_at    | ACP5      | -2.06 | 1.15E-02 |
| 1555153_s_at | FCHO2     | -2.06 | 4.17E-02 |
| 219525_at    | SLC47A1   | -2.04 | 4.03E-03 |
| 209831_x_at  | DNASE2    | -2.03 | 3.44E-03 |
| 205153_s_at  | CD40      | -2.02 | 4.91E-02 |
| 225057_at    | SLC15A4   | -2.01 | 3.48E-02 |
| 205627_at    | CDA       | -1.98 | 9.73E-03 |
| 1555736_a_at | AGTRAP    | -1.98 | 2.62E-02 |
| 209911_x_at  | HIST1H2BD | -1.97 | 3.60E-02 |
| 201037_at    | PFKP      | -1.97 | 3.10E-02 |

|              |                                         |       |          |
|--------------|-----------------------------------------|-------|----------|
| 221503_s_at  | KPNA3                                   | -1.96 | 3.12E-02 |
| 200901_s_at  | M6PR                                    | -1.96 | 1.30E-02 |
| 235354_s_at  | RSRC1                                   | -1.95 | 4.21E-02 |
| 225390_s_at  | KLF13                                   | -1.94 | 4.70E-02 |
| 205921_s_at  | SLC6A6                                  | -1.93 | 4.76E-02 |
| 227712_at    | LYRM2                                   | -1.93 | 1.45E-02 |
| 222143_s_at  | MTMR14                                  | -1.92 | 8.24E-03 |
| 212802_s_at  | GAPVD1                                  | -1.91 | 3.67E-02 |
| 204385_at    | KYNU                                    | -1.91 | 2.98E-03 |
| 206637_at    | P2RY14                                  | -1.88 | 2.52E-02 |
| 232682_at    | MREG                                    | -1.88 | 8.90E-03 |
| 212500_at    | ADO                                     | -1.87 | 3.68E-02 |
| 226550_at    | SLC9A7                                  | -1.86 | 2.73E-02 |
| 206714_at    | ALOX15B                                 | -1.86 | 4.39E-02 |
| 206050_s_at  | RNH1                                    | -1.85 | 4.10E-02 |
| 224689_at    | MANBAL                                  | -1.83 | 2.43E-02 |
| 233936_s_at  | GGNBP2                                  | -1.82 | 1.82E-02 |
| 203971_at    | SLC31A1                                 | -1.81 | 2.04E-02 |
| 220731_s_at  | NECAP2                                  | -1.79 | 1.35E-02 |
| 201411_s_at  | PLEKHB2                                 | -1.79 | 3.46E-02 |
| 227970_at    | GPR157                                  | -1.78 | 3.71E-02 |
| 219788_at    | PILRA                                   | -1.77 | 1.79E-02 |
| 217976_s_at  | DYNC1LI1                                | -1.77 | 4.49E-02 |
| 210841_s_at  | NRP2                                    | -1.76 | 4.66E-02 |
| 224871_at    | TPRG1L                                  | -1.76 | 2.06E-02 |
| 209571_at    | CIR1                                    | -1.75 | 2.33E-02 |
| 200752_s_at  | CAPN1                                   | -1.75 | 4.66E-02 |
| 211495_x_at  | TNFSF12 /// TNFSF12-TNFSF13 /// TNFSF13 | -1.75 | 2.84E-02 |
| 201198_s_at  | PSMD1                                   | -1.74 | 4.66E-02 |
| 225965_at    | DDHD1                                   | -1.74 | 2.85E-02 |
| 244154_at    | DDHD1                                   | -1.72 | 4.01E-02 |
| 207565_s_at  | MR1                                     | -1.71 | 3.82E-02 |
| 235710_at    | VPS53                                   | -1.71 | 2.08E-02 |
| 200052_s_at  | ILF2                                    | -1.71 | 8.24E-03 |
| 222993_at    | MRPL37                                  | -1.69 | 3.98E-02 |
| 226679_at    | SLC26A11                                | -1.68 | 4.98E-02 |
| 217625_x_at  | LINC00963                               | -1.68 | 2.06E-02 |
| 216095_x_at  | MTMR1                                   | -1.68 | 3.74E-02 |
| 1558371_a_at | ---                                     | -1.67 | 3.32E-02 |
| 232490_s_at  | PRUNE                                   | -1.67 | 4.05E-02 |
| 229597_s_at  | WDFY4                                   | -1.66 | 1.68E-02 |
| 212648_at    | DHX29                                   | -1.66 | 3.72E-02 |
| 204543_at    | RAPGEF1                                 | -1.65 | 3.19E-02 |

|              |                       |       |          |
|--------------|-----------------------|-------|----------|
| 31874_at     | GAS2L1                | -1.65 | 4.34E-02 |
| 210838_s_at  | ACVRL1                | -1.64 | 2.05E-02 |
| 209375_at    | XPC                   | -1.64 | 4.77E-02 |
| 236108_at    | EPG5                  | -1.63 | 3.96E-02 |
| 219053_s_at  | VPS37C                | -1.62 | 4.62E-02 |
| 222157_s_at  | WDR48                 | -1.62 | 2.58E-02 |
| 204316_at    | RGS10                 | -1.61 | 2.32E-02 |
| 208830_s_at  | SUPT6H                | -1.60 | 3.52E-02 |
| 218567_x_at  | DPP3                  | -1.59 | 2.44E-02 |
| 209553_at    | LOC100505729 /// VPS8 | -1.59 | 2.93E-02 |
| 231913_s_at  | BRCC3                 | -1.58 | 1.98E-02 |
| 208021_s_at  | RFC1                  | -1.58 | 7.23E-03 |
| 227463_at    | ACE                   | -1.58 | 9.30E-03 |
| 203912_s_at  | DNASE1L1              | -1.57 | 3.05E-02 |
| 202703_at    | DUSP11                | -1.56 | 1.55E-03 |
| 203291_at    | CNOT4                 | -1.56 | 3.43E-02 |
| 209523_at    | TAF2                  | -1.56 | 2.86E-02 |
| 205248_at    | DOPEY2                | -1.55 | 2.22E-02 |
| 209629_s_at  | NXT2                  | -1.55 | 4.74E-02 |
| 1554780_a_at | PHTF2                 | -1.55 | 4.02E-02 |
| 205746_s_at  | ADAM17                | -1.54 | 3.42E-02 |
| 212497_at    | MAPK1IP1L             | -1.54 | 2.89E-02 |
| 214941_s_at  | PRPF40A               | -1.54 | 3.21E-02 |
| 217808_s_at  | MAPKAP1               | -1.53 | 1.29E-02 |
| 204601_at    | N4BP1                 | -1.53 | 4.08E-02 |
| 207847_s_at  | MUC1                  | -1.53 | 2.89E-02 |
| 36566_at     | CTNS                  | -1.53 | 2.96E-02 |
| 213039_at    | ARHGEF18              | -1.52 | 3.83E-02 |
| 214708_at    | SNTB1                 | -1.52 | 4.09E-02 |
| 241068_at    | ---                   | -1.51 | 1.38E-02 |
| 238539_at    | HPS3                  | -1.51 | 3.58E-02 |
| 209093_s_at  | GBA /// GBAP1         | -1.51 | 2.24E-02 |

\

**Supplemental Table 5.** Probe sets indicating decreased expression in GPA versus normal controls that are common to both our study of anterior orbit and a published study of leukocytes (Alcorta D, et al. Microarray studies of gene expression in circulating leukocytes in kidney diseases. *Experimental Nephrology*. 2002;10:139-49; Alcorta DA, et al. Leukocyte gene expression signatures in antineutrophil cytoplasmic autoantibody and lupus glomerulonephritis. *Kidney International*. 2007;72:853-64).

| <b>Probe Set</b>                      | <b>Gene Symbol</b> | <b>Gene Title</b>                                               |
|---------------------------------------|--------------------|-----------------------------------------------------------------|
| 207275_s_at                           | ACSL1              | acyl-CoA synthetase long-chain family member 1                  |
| 202912_at                             | ADM                | adrenomedullin                                                  |
| 220326_s_at<br>58780_s_at             | ARHGEF40           | Rho guanine nucleotide exchange factor (GEF) 40                 |
| 210896_s_at<br>209135_at<br>224996_at | ASPH               | aspartate beta-hydroxylase                                      |
| 224707_at                             | CYSTM1             | cysteine-rich transmembrane module containing 1                 |
| 201328_at                             | ETS2               | v-ets erythroblastosis virus E26 oncogene homolog 2 (avian)     |
| 227466_at                             | FAM200B            | family with sequence similarity 200, member B                   |
| 223836_at                             | FGFBP2             | fibroblast growth factor binding protein 2                      |
| 204115_at                             | GNG11              | guanine nucleotide binding protein (G protein), gamma 11        |
| 209409_at                             | GRB10              | growth factor receptor-bound protein 10                         |
| 209185_s_at                           | IRS2               | insulin receptor substrate 2                                    |
| 202747_s_at                           | ITM2A              | integral membrane protein 2A                                    |
| 200923_at                             | LGALS3BP           | lectin, galactoside-binding, soluble, 3 binding protein         |
| 202032_s_at                           | MAN2A2             | mannosidase, alpha, class 2A, member 2                          |
| 223044_at                             | SLC40A1            | solute carrier family 40 (iron-regulated transporter), member 1 |
| 202863_at                             | SP100              | SP100 nuclear antigen                                           |
| 216191_s_at                           | TRDV3              | T cell receptor delta variable 3                                |
| 217143_s_at                           | YME1L1             | YME1-like 1 ( <i>S. cerevisiae</i> )                            |
